# Supplementary material for: In Silico Characterization of blaNDM-Harboring Conjugative Plasmids in Acinetobacter Species
Source: PubMed Central journal article supplement (PMC9769834; doi:10.1128/spectrum.02102-22), 2022-10-27
Supplement: spectrum.02102-22-s0001.pdf [file spectrum.02102-22-s0001.pdf]

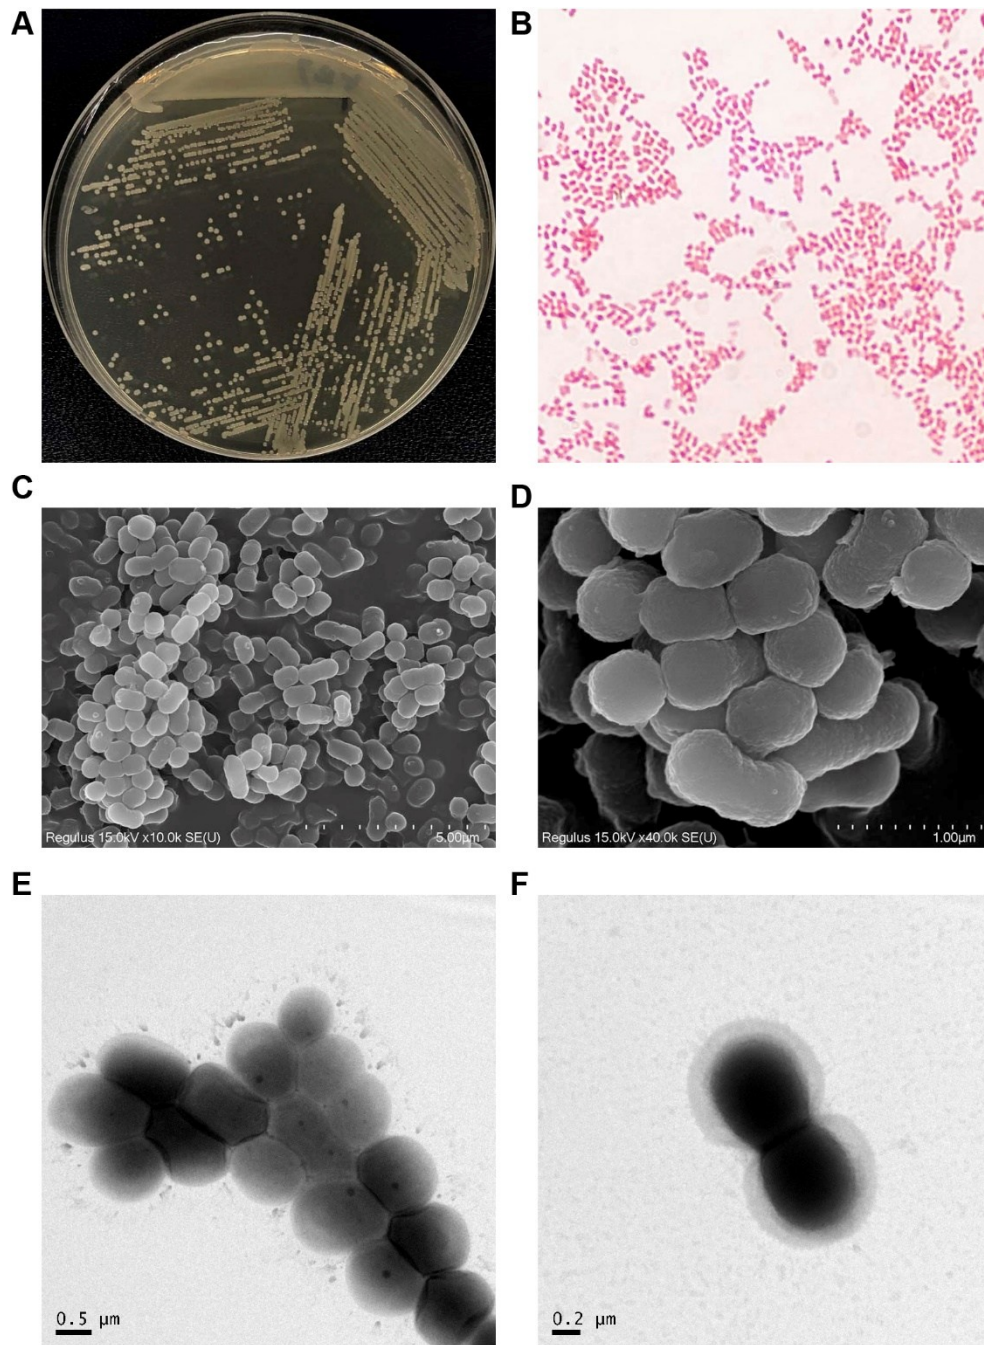

**Figure S1.** Microbial characterization of the strain YR7. (A) Colonial phenotype of the strain YR7 on MHA plates. (B) Gram-staining analysis of the strain YR7. (C&D) Scanning electron micrographs of the cell surface of strain YR7. (E&F) Transmission electron micrographs of the strain YR7.

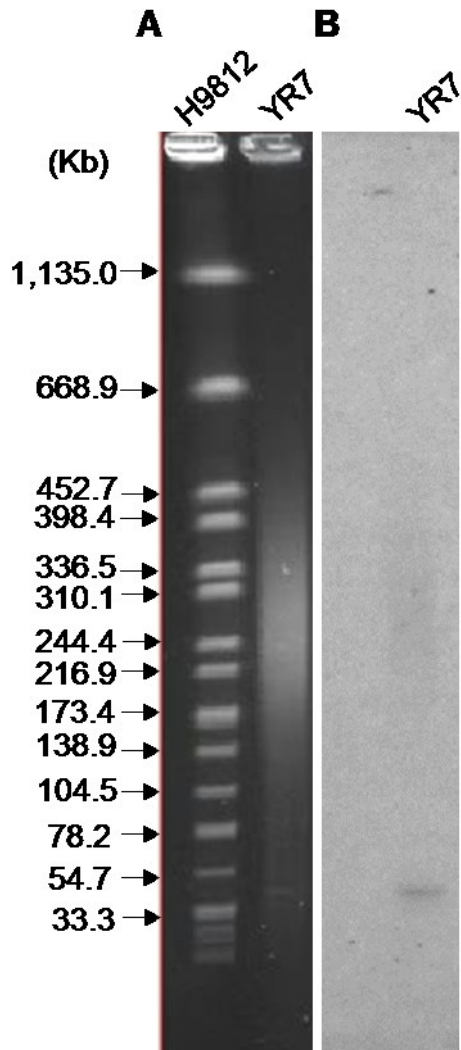

**Figure S2.** The plasmid size of pNDM-YR7 using an S1-PFGE (A) and confirmation the presence of *bla<sub>NDM</sub>* on plasmid using southern blotting (B).

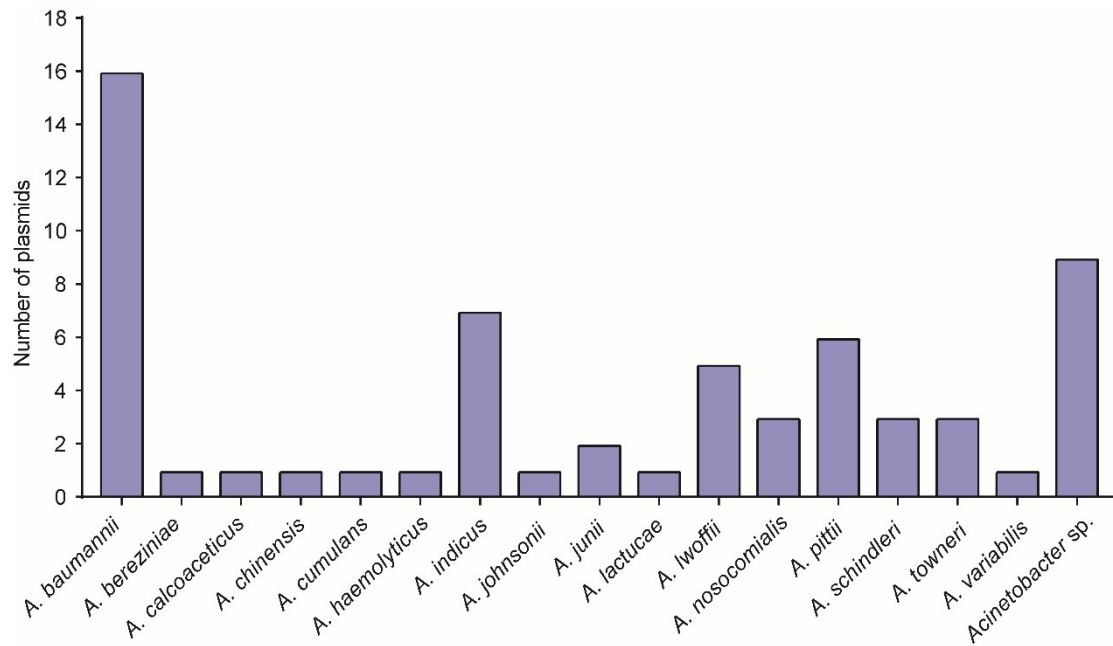

**Figure S3.** Histogram about number of plasmids distributed in different species for the 62 *bla*<sub>NDM</sub>-positive plasmids in *Acinetobacter* species.

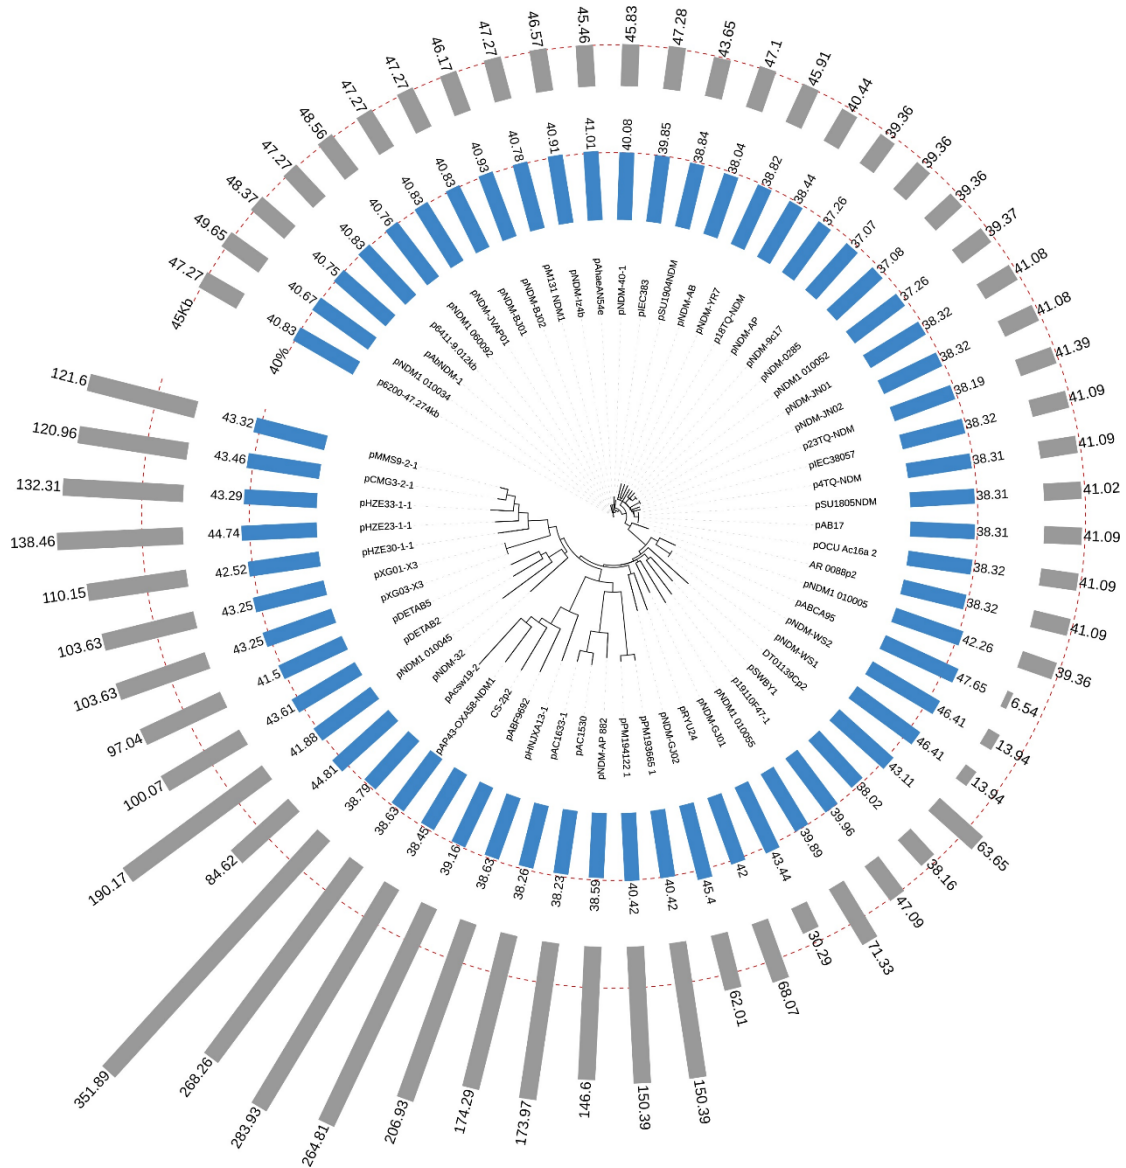

**Figure S4.** Length distribution of length and GC content of the 62 *bla*<sub>NDM</sub>-positive plasmids from 1191 plasmids of *Acinetobacter* species. (A) Length distribution of the 30 *bla*<sub>NDM</sub>-positive plasmids in *Acinetobacter* species. (B) GC content distribution of the 30 *bla*<sub>NDM</sub>-positive plasmids in *Acinetobacter* species.

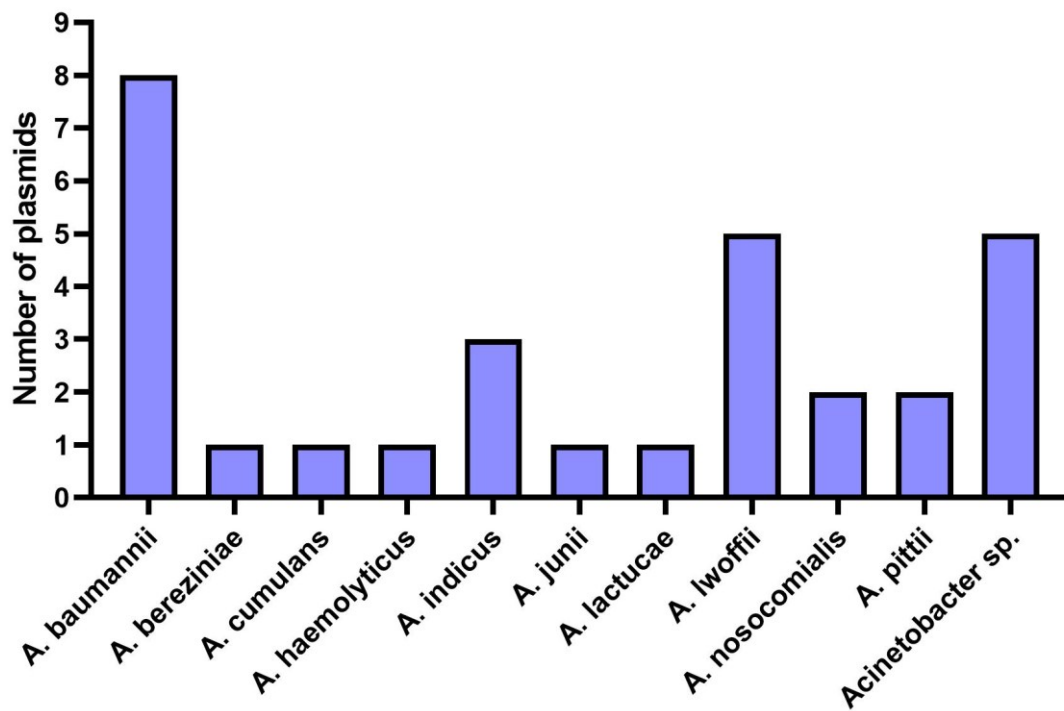

**Figure S5.** Histogram about number of plasmids distributed in different species for the 30 *bla*<sub>NDM</sub>-positive conjugative plasmids in *Acinetobacter* species.

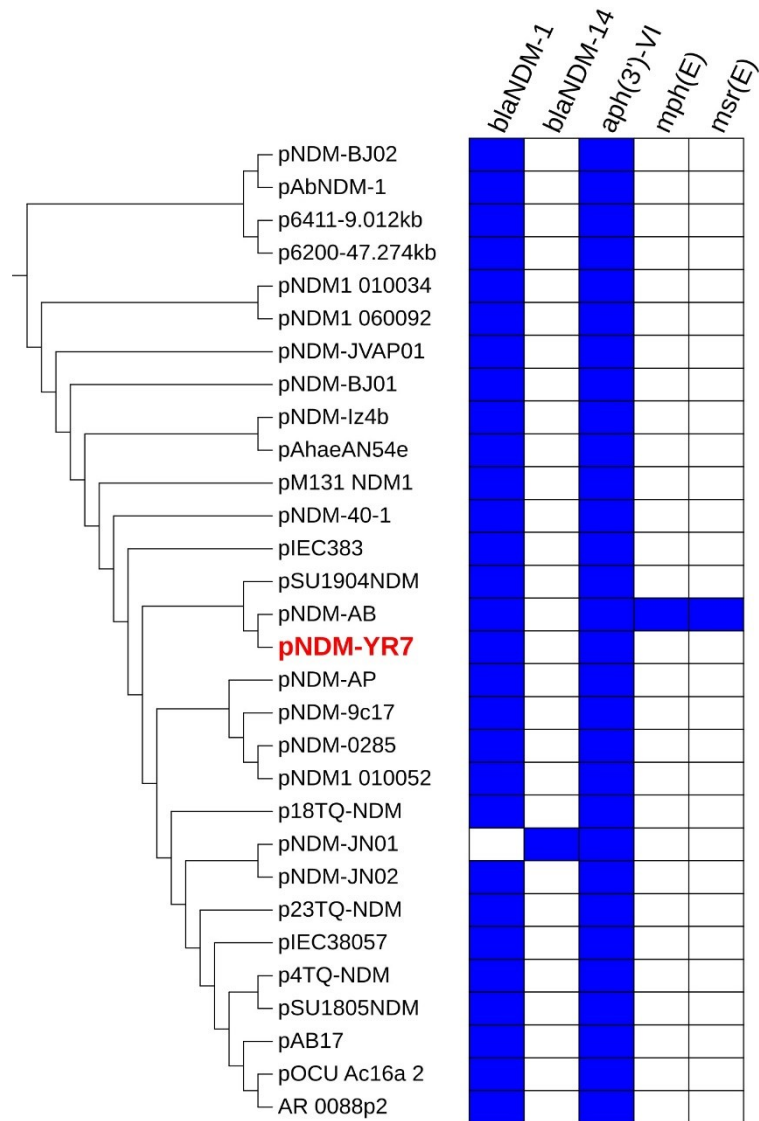

**Figure S6.** An overview of the ResFinder-facilitated detection of acquired antimicrobial resistance genes (ARGs) towards the 30 *bla*<sub>NDM</sub>-positive conjugative plasmids in *Acinetobacter* species.

### **Table legends :**

**Table S1.** Information of 1,191 plasmids from *Acinetobacter* species downloaded from the NCBI RefSeq database.

**Table S2.** Details of the results of software ResFinder based on the 1,191 plasmids of *Acinetobacter* species from the GenBank RefSeq database.

**Table S3.** Results of alignments of the genetic contexts associated with bla<sub>NDM-1</sub> and *aph(3')-VI* of plasmid pNDM-YR7 in *A. junii* YR7 against the nr database of GenBank (Top100 results).

| #ID | Accession number | Description                                                           |
|-----|------------------|-----------------------------------------------------------------------|
| 1   | NC_000923        | Acinetobacter sp. SUN plasmid pRAY, complete sequence                 |
| 2   | NC_002760        | Acinetobacter sp. EB104 plasmid pAC450, complete sequence             |
| 3   | NC_006877        | Acinetobacter baumannii plasmid pMAC, complete sequence               |
| 4   | NC_010309        | Acinetobacter venetianus plasmid pAV1, complete sequence              |
| 5   | NC_010310        | Acinetobacter venetianus plasmid pAV2, complete sequence              |
| 6   | NC_010401        | Acinetobacter baumannii AYE plasmid p1ABAYE, complete sequence        |
| 7   | NC_010402        | Acinetobacter baumannii AYE plasmid p2ABAYE, complete sequence        |
| 8   | NC_010403        | Acinetobacter baumannii AYE plasmid p4ABAYE, complete sequence        |
| 9   | NC_010404        | Acinetobacter baumannii AYE plasmid p3ABAYE, complete sequence        |
| 10  | NC_010481        | Acinetobacter baumannii plasmid pABIR, complete sequence              |
| 11  | NC_010605        | Acinetobacter baumannii ACICU plasmid pACICU1, complete sequence      |
| 12  | NC_010606        | Acinetobacter baumannii ACICU plasmid pACICU2, complete sequence      |
| 13  | NC_011585        | Acinetobacter baumannii AB0057 plasmid pAB0057, complete sequence     |
| 14  | NC_012813        | Acinetobacter baumannii plasmid pABVA01, complete sequence            |
| 15  | NC_013056        | Acinetobacter calcoaceticus plasmid pMMCU1, complete sequence         |
| 16  | NC_013277        | Acinetobacter baumannii plasmid pMMA2, complete sequence              |
| 17  | NC_013506        | Acinetobacter baumannii plasmid pMMCU2, complete sequence             |
| 18  | NC_016977        | Acinetobacter baumannii plasmid pTS236, complete sequence             |
| 19  | NC_017163        | Acinetobacter baumannii 1656-2 plasmid ABKp1, complete sequence       |
| 20  | NC_017164        | Acinetobacter baumannii 1656-2 plasmid ABKp2, complete sequence       |
| 21  | NC_017848        | Acinetobacter baumannii MDR-TJ plasmid pABTJ1, complete sequence      |
| 22  | NC_019199        | Acinetobacter baumannii plasmid pMMCU3, complete sequence             |
| 23  | NC_019268        | Acinetobacter lwoffii plasmid pNDM-BJ01, complete sequence            |
| 24  | NC_019280        | Acinetobacter baumannii plasmid pMMD, complete sequence               |
| 25  | NC_019281        | Acinetobacter lwoffii plasmid pNDM-BJ02, complete sequence            |
| 26  | NC_019311        | Acinetobacter baumannii plasmid pRAY*-v1, complete sequence           |
| 27  | NC_019345        | Acinetobacter baumannii plasmid pRAY*-v2, complete sequence           |
| 28  | NC_019359        | Acinetobacter baumannii plasmid pAB120, complete sequence             |
| 29  | NC_019985        | Acinetobacter baumannii ZW85-1 plasmid pAbNDM-1, complete sequence    |
| 30  | NC_020524        | Acinetobacter baumannii MDR-TJ plasmid pABTJ2, complete sequence      |
| 31  | NC_020525        | Acinetobacter baumannii D1279779 plasmid pD1279779, complete sequence |
| 32  | NC_020818        | Acinetobacter baumannii plasmid pNDM-AB, complete sequence            |



|    |           |                                                                                 |
|----|-----------|---------------------------------------------------------------------------------|
| 33 | NC_021489 | <i>Acinetobacter baumannii</i> plasmid pAB-NCGM253, complete sequence           |
| 34 | NC_021727 | <i>Acinetobacter baumannii</i> BJAB07104 plasmid p1BJAB07104, complete sequence |
| 35 | NC_021728 | <i>Acinetobacter baumannii</i> BJAB07104 plasmid p2BJAB07104, complete sequence |
| 36 | NC_021730 | <i>Acinetobacter baumannii</i> BJAB0868 plasmid p1BJAB0868, complete sequence   |
| 37 | NC_021731 | <i>Acinetobacter baumannii</i> BJAB0868 plasmid p2BJAB0868, complete sequence   |
| 38 | NC_021732 | <i>Acinetobacter baumannii</i> BJAB0868 plasmid p3BJAB0868, complete sequence   |
| 39 | NC_021734 | <i>Acinetobacter baumannii</i> BJAB0715 plasmid pBJAB0715, complete sequence    |
| 40 | NC_022565 | <i>Acinetobacter baumannii</i> 107m plasmid ABIBUN107mP1, complete sequence     |
| 41 | NC_023031 | <i>Acinetobacter baumannii</i> ZW85-1 plasmid ZW85p2, complete sequence         |
| 42 | NC_023280 | <i>Acinetobacter nosocomialis</i> plasmid pRAY*-v3, complete sequence           |
| 43 | NC_023281 | <i>Acinetobacter nosocomialis</i> plasmid pAB49-v1, complete sequence           |
| 44 | NC_023322 | <i>Acinetobacter bereziniae</i> plasmid pNDM-40-1, complete sequence            |
| 45 | NC_024959 | <i>Acinetobacter calcoaceticus</i> plasmid pNDM-WS2, complete sequence          |
| 46 | NC_024999 | <i>Acinetobacter junii</i> plasmid pNDM-WS1, complete sequence                  |
| 47 | NC_025000 | <i>Acinetobacter lwoffii</i> plasmid pNDM-lz4b, complete sequence               |
| 48 | NC_025068 | <i>Acinetobacter baumannii</i> plasmid pRAY*, complete sequence                 |
| 49 | NC_025104 | <i>Acinetobacter baumannii</i> plasmid pAb-G7-2, complete sequence              |
| 50 | NC_025109 | <i>Acinetobacter baumannii</i> plasmid pA85-3, complete sequence                |
| 51 | NC_025110 | <i>Acinetobacter baumannii</i> plasmid pAB-G7-1, complete sequence              |
| 52 | NC_025111 | <i>Acinetobacter baumannii</i> plasmid pD72-2, complete sequence                |
| 53 | NC_025116 | <i>Acinetobacter</i> sp. M131 plasmid pM131_NDM1, complete sequence             |
| 54 | NC_025117 | <i>Acinetobacter</i> sp. M131 plasmid pM131-11, complete sequence               |
| 55 | NC_025118 | <i>Acinetobacter</i> sp. M131 plasmid pM131-9, complete sequence                |
| 56 | NC_025119 | <i>Acinetobacter</i> sp. M131 plasmid pM131-8, complete sequence                |
| 57 | NC_025120 | <i>Acinetobacter</i> sp. M131 plasmid pM131-6, complete sequence                |
| 58 | NC_025121 | <i>Acinetobacter</i> sp. M131 plasmid pM131-4, complete sequence                |
| 59 | NC_025122 | <i>Acinetobacter</i> sp. M131 plasmid pM131-3, complete sequence                |
| 60 | NC_025137 | <i>Acinetobacter pittii</i> plasmid pMS32-3, complete sequence                  |
| 61 | NC_025168 | <i>Acinetobacter baumannii</i> plasmid AbATCC329, complete sequence             |
| 62 | NC_025169 | <i>Acinetobacter</i> sp. M131 plasmid pM131-10, complete sequence               |
| 63 | NC_025170 | <i>Acinetobacter</i> sp. M131 plasmid pM131-7, complete sequence                |
| 64 | NC_025171 | <i>Acinetobacter</i> sp. M131 plasmid pM131-5, complete sequence                |

|    |             |                                                                                                                      |
|----|-------------|----------------------------------------------------------------------------------------------------------------------|
| 65 | NC_025172   | Acinetobacter sp. M131 plasmid pM131-2, complete sequence                                                            |
| 66 | NC_025173   | Acinetobacter pittii plasmid pMS32-1, complete sequence                                                              |
| 67 | NZ_AP014650 | Acinetobacter baumannii strain IOMTU433 plasmid pIOMTU433, complete sequence                                         |
| 68 | NZ_AP018825 | Acinetobacter ursingii strain M3 plasmid pAURM-1, complete sequence                                                  |
| 69 | NZ_AP018826 | Acinetobacter ursingii strain M3 plasmid pAURM-2, complete sequence                                                  |
| 70 | NZ_AP019741 | Acinetobacter radioresistens DSM 6976 = NBRC 102413 = CIP 103788 strain NBRC 102413 plasmid pARA1, complete sequence |
| 71 | NZ_AP019742 | Acinetobacter radioresistens DSM 6976 = NBRC 102413 = CIP 103788 strain NBRC 102413 plasmid pARA2, complete sequence |
| 72 | NZ_AP019743 | Acinetobacter radioresistens DSM 6976 = NBRC 102413 = CIP 103788 strain NBRC 102413 plasmid pARA3, complete sequence |
| 73 | NZ_AP019744 | Acinetobacter radioresistens DSM 6976 = NBRC 102413 = CIP 103788 strain NBRC 102413 plasmid pARA4, complete sequence |
| 74 | NZ_AP019745 | Acinetobacter radioresistens DSM 6976 = NBRC 102413 = CIP 103788 strain NBRC 102413 plasmid pARA5, complete sequence |
| 75 | NZ_AP019746 | Acinetobacter radioresistens DSM 6976 = NBRC 102413 = CIP 103788 strain NBRC 102413 plasmid pARA6, complete sequence |
| 76 | NZ_AP019747 | Acinetobacter radioresistens DSM 6976 = NBRC 102413 = CIP 103788 strain NBRC 102413 plasmid pARA7, complete sequence |
| 77 | NZ_AP019748 | Acinetobacter radioresistens DSM 6976 = NBRC 102413 = CIP 103788 strain NBRC 102413 plasmid pARA8, complete sequence |
| 78 | NZ_AP021937 | Acinetobacter pittii strain WP2-W18-ESBL-11 plasmid pWP2-W18-ESBL-11_1, complete sequence                            |
| 79 | NZ_AP021938 | Acinetobacter pittii strain WP2-W18-ESBL-11 plasmid pWP2-W18-ESBL-11_2, complete sequence                            |
| 80 | NZ_AP021939 | Acinetobacter pittii strain WP2-W18-ESBL-11 plasmid pWP2-W18-ESBL-11_3, complete sequence                            |
| 81 | NZ_AP022239 | Acinetobacter baumannii strain WP8-W18-ESBL-11 plasmid pWP8-W18-ESBL-11_1, complete sequence                         |
| 82 | NZ_AP022240 | Acinetobacter baumannii strain WP8-W18-ESBL-11 plasmid pWP8-W18-ESBL-11_2, complete sequence                         |
| 83 | NZ_AP022303 | Acinetobacter sp. BEC1-S18-ESBL-01 plasmid pBEC1-S18-ESBL-01_1, complete sequence                                    |
| 84 | NZ_AP022304 | Acinetobacter sp. BEC1-S18-ESBL-01 plasmid pBEC1-S18-ESBL-01_2, complete sequence                                    |
| 85 | NZ_AP023078 | Acinetobacter baumannii strain OCU_Ac16a plasmid pOCU_Ac16a_1, complete sequence                                     |
| 86 | NZ_AP023079 | Acinetobacter baumannii strain OCU_Ac16a plasmid pOCU_Ac16a_2, complete sequence                                     |
| 87 | NZ_AP023080 | Acinetobacter baumannii strain OCU_Ac16a plasmid pOCU_Ac16a_3, complete sequence                                     |
| 88 | NZ_CP006964 | Acinetobacter baumannii PKAB07 strain AB07 plasmid pPKAB07, complete sequence                                        |
| 89 | NZ_CP007713 | Acinetobacter baumannii LAC-4 plasmid pABLAC1, complete sequence                                                     |
| 90 | NZ_CP007714 | Acinetobacter baumannii LAC-4 plasmid pABLAC2, complete sequence                                                     |

|     |             |                                                                                        |
|-----|-------------|----------------------------------------------------------------------------------------|
| 91  | NZ_CP008707 | Acinetobacter baumannii strain AB5075-UW plasmid p1AB5075, complete sequence           |
| 92  | NZ_CP008708 | Acinetobacter baumannii strain AB5075-UW plasmid p2AB5075, complete sequence           |
| 93  | NZ_CP008709 | Acinetobacter baumannii strain AB5075-UW plasmid p3AB5075, complete sequence           |
| 94  | NZ_CP008850 | Acinetobacter baumannii strain AC29 plasmid pAC29a, complete sequence                  |
| 95  | NZ_CP008851 | Acinetobacter baumannii strain AC29 plasmid pAC29b, complete sequence                  |
| 96  | NZ_CP010351 | Acinetobacter johnsonii XBB1 plasmid pXBB1-9, complete sequence                        |
| 97  | NZ_CP010352 | Acinetobacter johnsonii XBB1 plasmid pXBB1-1, complete sequence                        |
| 98  | NZ_CP010353 | Acinetobacter johnsonii XBB1 plasmid pXBB1-2, complete sequence                        |
| 99  | NZ_CP010354 | Acinetobacter johnsonii XBB1 plasmid pXBB1-3, complete sequence                        |
| 100 | NZ_CP010355 | Acinetobacter johnsonii XBB1 plasmid pXBB1-4, complete sequence                        |
| 101 | NZ_CP010356 | Acinetobacter johnsonii XBB1 plasmid pXBB1-5, complete sequence                        |
| 102 | NZ_CP010357 | Acinetobacter johnsonii XBB1 plasmid pXBB1-6, complete sequence                        |
| 103 | NZ_CP010358 | Acinetobacter johnsonii XBB1 plasmid pXBB1-8, complete sequence                        |
| 104 | NZ_CP010369 | Acinetobacter nosocomialis strain 6411 plasmid p6411-89.111kb, complete sequence       |
| 105 | NZ_CP010370 | Acinetobacter nosocomialis strain 6411 plasmid p6411-9.012kb, complete sequence        |
| 106 | NZ_CP010398 | Acinetobacter baumannii strain 6200 plasmid p6200-114.848kb, complete sequence         |
| 107 | NZ_CP010399 | Acinetobacter baumannii strain 6200 plasmid p6200-47.274kb, complete sequence          |
| 108 | NZ_CP010400 | Acinetobacter baumannii strain 6200 plasmid p6200-9.327kb, complete sequence           |
| 109 | NZ_CP010780 | Acinetobacter baumannii strain XH386 plasmid pAB386, complete sequence                 |
| 110 | NZ_CP010782 | Acinetobacter baumannii strain A1 plasmid pA1-1, complete sequence                     |
| 111 | NZ_CP010903 | Acinetobacter nosocomialis strain 6411 plasmid p6411-66.409kb, complete sequence       |
| 112 | NZ_CP012005 | Acinetobacter baumannii strain ATCC 17978-mff plasmid pAB3, complete sequence          |
| 113 | NZ_CP012007 | Acinetobacter baumannii strain Ab04-mff plasmid pAB04-1, complete sequence             |
| 114 | NZ_CP012008 | Acinetobacter baumannii strain Ab04-mff plasmid pAB04-2, complete sequence             |
| 115 | NZ_CP012953 | Acinetobacter baumannii strain D36 plasmid pD36-1 clone GC1, complete sequence         |
| 116 | NZ_CP012954 | Acinetobacter baumannii strain D36 plasmid pRAY* (pD36-2) clone GC1, complete sequence |
| 117 | NZ_CP012955 | Acinetobacter baumannii strain D36 plasmid pD36-3 clone GC1, complete sequence         |
| 118 | NZ_CP012956 | Acinetobacter baumannii strain D36 plasmid pD36-4 clone GC1, complete sequence         |
| 119 | NZ_CP013925 | Acinetobacter baumannii strain KBN10P02143 plasmid pKBN10P02143, complete sequence     |
| 120 | NZ_CP014216 | Acinetobacter baumannii strain YU-R612 plasmid unnamed1, complete sequence             |
| 121 | NZ_CP014217 | Acinetobacter baumannii strain YU-R612 plasmid unnamed2, complete sequence             |
| 122 | NZ_CP014478 | Acinetobacter pittii strain AP_882 plasmid pNDM-AP_882, complete sequence              |

|     |             |                                                                                          |
|-----|-------------|------------------------------------------------------------------------------------------|
| 123 | NZ_CP014479 | Acinetobacter pittii strain AP_882 plasmid pOXA58-AP_882, complete sequence              |
| 124 | NZ_CP015111 | Acinetobacter sp. TGL-Y2 plasmid unnamed1, complete sequence                             |
| 125 | NZ_CP015112 | Acinetobacter sp. TGL-Y2 plasmid unnamed2, complete sequence                             |
| 126 | NZ_CP015122 | Acinetobacter baumannii strain ab736 plasmid unnamed, complete sequence                  |
| 127 | NZ_CP015146 | Acinetobacter pittii strain IEC338SC plasmid pIEC338SCOX, complete sequence              |
| 128 | NZ_CP015147 | Acinetobacter pittii strain IEC338SC plasmid pIEC338SC2, complete sequence               |
| 129 | NZ_CP015148 | Acinetobacter pittii strain IEC338SC plasmid pIEC338SC3, complete sequence               |
| 130 | NZ_CP015365 | Acinetobacter baumannii strain 3207 plasmid pAba3207a, complete sequence                 |
| 131 | NZ_CP015366 | Acinetobacter baumannii strain 3207 plasmid pAba3207b, complete sequence                 |
| 132 | NZ_CP015484 | Acinetobacter baumannii strain ORAB01 plasmid pORAB01-1, complete sequence               |
| 133 | NZ_CP015485 | Acinetobacter baumannii strain ORAB01 plasmid pORAB01-2, complete sequence               |
| 134 | NZ_CP015486 | Acinetobacter baumannii strain ORAB01 plasmid pORAB01-3, complete sequence               |
| 135 | NZ_CP015595 | Acinetobacter sp. NCu2D-2 plasmid unnamed, complete sequence                             |
| 136 | NZ_CP015616 | Acinetobacter schindleri strain ACE plasmid p1AsACE, complete sequence                   |
| 137 | NZ_CP015617 | Acinetobacter schindleri strain ACE plasmid p2AsACE, complete sequence                   |
| 138 | NZ_CP015618 | Acinetobacter schindleri strain ACE plasmid p3AsACE, complete sequence                   |
| 139 | NZ_CP015619 | Acinetobacter schindleri strain ACE plasmid p4AsACE, complete sequence                   |
| 140 | NZ_CP015620 | Acinetobacter schindleri strain ACE plasmid p5AsACE, complete sequence                   |
| 141 | NZ_CP015621 | Acinetobacter schindleri strain ACE plasmid p6AsACE, complete sequence                   |
| 142 | NZ_CP016296 | Acinetobacter baumannii strain CMC-CR-MDR-Ab4 plasmid pCMCVTab1-Ab4, complete sequence   |
| 143 | NZ_CP016297 | Acinetobacter baumannii strain CMC-CR-MDR-Ab4 plasmid pCMCVTab2-Ab4, complete sequence   |
| 144 | NZ_CP016299 | Acinetobacter baumannii strain CMC-MDR-Ab59 plasmid pCMCVTab1-Ab59, complete sequence    |
| 145 | NZ_CP016301 | Acinetobacter baumannii strain CMC-CR-MDR-Ab66 plasmid pCMCVTab1-Ab66, complete sequence |
| 146 | NZ_CP016302 | Acinetobacter baumannii strain CMC-CR-MDR-Ab66 plasmid pCMCVTab2-Ab66, complete sequence |
| 147 | NZ_CP016897 | Acinetobacter soli strain GFJ2 plasmid pGFJ1, complete sequence                          |
| 148 | NZ_CP016898 | Acinetobacter soli strain GFJ2 plasmid pGFJ2, complete sequence                          |
| 149 | NZ_CP016899 | Acinetobacter soli strain GFJ2 plasmid pGFJ3, complete sequence                          |
| 150 | NZ_CP016900 | Acinetobacter soli strain GFJ2 plasmid pGFJ4, complete sequence                          |
| 151 | NZ_CP016901 | Acinetobacter soli strain GFJ2 plasmid pGFJ5, complete sequence                          |
| 152 | NZ_CP016902 | Acinetobacter soli strain GFJ2 plasmid pGFJ6, complete sequence                          |

|     |             |                                                                                                      |
|-----|-------------|------------------------------------------------------------------------------------------------------|
| 153 | NZ_CP016903 | <i>Acinetobacter soli</i> strain GFJ2 plasmid pGFJ7, complete sequence                               |
| 154 | NZ_CP017643 | <i>Acinetobacter baumannii</i> strain KAB01 plasmid unnamed, complete sequence                       |
| 155 | NZ_CP017645 | <i>Acinetobacter baumannii</i> strain KAB02 plasmid unnamed, complete sequence                       |
| 156 | NZ_CP017647 | <i>Acinetobacter baumannii</i> strain KAB03 plasmid unnamed, complete sequence                       |
| 157 | NZ_CP017649 | <i>Acinetobacter baumannii</i> strain KAB04 plasmid unnamed, complete sequence                       |
| 158 | NZ_CP017651 | <i>Acinetobacter baumannii</i> strain KAB05 plasmid unnamed, complete sequence                       |
| 159 | NZ_CP017653 | <i>Acinetobacter baumannii</i> strain KAB06 plasmid unnamed, complete sequence                       |
| 160 | NZ_CP017655 | <i>Acinetobacter baumannii</i> strain KAB07 plasmid pKAB07, complete sequence                        |
| 161 | NZ_CP017657 | <i>Acinetobacter baumannii</i> strain KAB08 plasmid unnamed, complete sequence                       |
| 162 | NZ_CP017939 | <i>Acinetobacter pittii</i> strain YMC2010/8/T346 plasmid unnamed1, complete sequence                |
| 163 | NZ_CP018141 | <i>Acinetobacter larvae</i> strain BRTC-1 plasmid pRW1, complete sequence                            |
| 164 | NZ_CP018142 | <i>Acinetobacter larvae</i> strain BRTC-1 plasmid pRW2, complete sequence                            |
| 165 | NZ_CP018144 | <i>Acinetobacter baumannii</i> strain HRAB-85 plasmid unnamed, complete sequence                     |
| 166 | NZ_CP018255 | <i>Acinetobacter baumannii</i> strain AF-401 plasmid pAF-401, complete sequence                      |
| 167 | NZ_CP018257 | <i>Acinetobacter baumannii</i> strain AF-673 plasmid pAF-673, complete sequence                      |
| 168 | NZ_CP018261 | <i>Acinetobacter haemolyticus</i> strain XH900 plasmid pXH901, complete sequence                     |
| 169 | NZ_CP018333 | <i>Acinetobacter baumannii</i> strain A1296 isolate A1296 plasmid pA1296_1, complete sequence        |
| 170 | NZ_CP018334 | <i>Acinetobacter baumannii</i> strain A1296 isolate A1296 plasmid pA1296_2, complete sequence        |
| 171 | NZ_CP018422 | <i>Acinetobacter baumannii</i> strain XDR-BJ83 isolate male patient plasmid pBJ83, complete sequence |
| 172 | NZ_CP018678 | <i>Acinetobacter baumannii</i> strain LAC4 plasmid pALAC4-1, complete sequence                       |
| 173 | NZ_CP018679 | <i>Acinetobacter baumannii</i> strain LAC4 plasmid pALAC4-2, complete sequence                       |
| 174 | NZ_CP018862 | <i>Acinetobacter baumannii</i> strain 11510 plasmid pAba11510a                                       |
| 175 | NZ_CP018872 | <i>Acinetobacter haemolyticus</i> strain TJS01 plasmid pAHTJS1, complete sequence                    |
| 176 | NZ_CP018873 | <i>Acinetobacter haemolyticus</i> strain TJS01 plasmid pAHTJS2, complete sequence                    |
| 177 | NZ_CP018910 | <i>Acinetobacter pittii</i> strain XJ88 plasmid unnamed1, complete sequence                          |
| 178 | NZ_CP019115 | <i>Acinetobacter baumannii</i> strain MDR-CQ plasmid pMDR-CQ, complete sequence                      |
| 179 | NZ_CP019144 | <i>Acinetobacter lwoffii</i> strain ZS207 plasmid pmZS sequence                                      |
| 180 | NZ_CP019145 | <i>Acinetobacter lwoffii</i> strain ZS207 plasmid pZS-3, complete sequence                           |
| 181 | NZ_CP019146 | <i>Acinetobacter lwoffii</i> strain ZS207 plasmid pZS-6, complete sequence                           |
| 182 | NZ_CP019147 | <i>Acinetobacter lwoffii</i> strain ZS207 plasmid pZS-7, complete sequence                           |
| 183 | NZ_CP019148 | <i>Acinetobacter lwoffii</i> strain ZS207 plasmid pZS-8, complete sequence                           |
| 184 | NZ_CP019149 | <i>Acinetobacter lwoffii</i> strain ZS207 plasmid pZS-9, complete sequence                           |

|     |             |                                                                            |
|-----|-------------|----------------------------------------------------------------------------|
| 185 | NZ_CP019150 | Acinetobacter lwoffii strain ZS207 plasmid pZS-11, complete sequence       |
| 186 | NZ_CP019151 | Acinetobacter lwoffii strain ZS207 plasmid pZS-13, complete sequence       |
| 187 | NZ_CP019152 | Acinetobacter lwoffii strain ZS207 plasmid pZS-20, complete sequence       |
| 188 | NZ_CP019218 | Acinetobacter baumannii strain XH731 plasmid pXH731, complete sequence     |
| 189 | NZ_CP020001 | Acinetobacter calcoaceticus strain CA16 plasmid pCA16, complete sequence   |
| 190 | NZ_CP020573 | Acinetobacter baumannii strain 15A5 plasmid p15A5_1, complete sequence     |
| 191 | NZ_CP020575 | Acinetobacter baumannii strain 15A5 plasmid p15A5_2, complete sequence     |
| 192 | NZ_CP020576 | Acinetobacter baumannii strain SSA12 plasmid pSSA12_2, complete sequence   |
| 193 | NZ_CP020577 | Acinetobacter baumannii strain SSA12 plasmid pSSA12_1, complete sequence   |
| 194 | NZ_CP020580 | Acinetobacter baumannii strain SSMA17 plasmid pSSMA17_1, complete sequence |
| 195 | NZ_CP020582 | Acinetobacter baumannii strain JBA13 plasmid pJBA13_1, complete sequence   |
| 196 | NZ_CP020583 | Acinetobacter baumannii strain JBA13 plasmid pJBA13_2, complete sequence   |
| 197 | NZ_CP020585 | Acinetobacter baumannii strain CBA7 plasmid pCBA7_1, complete sequence     |
| 198 | NZ_CP020587 | Acinetobacter nosocomialis strain SSA3 plasmid pSSA3_1, complete sequence  |
| 199 | NZ_CP020589 | Acinetobacter baumannii strain 15A34 plasmid p15A34_1, complete sequence   |
| 200 | NZ_CP020593 | Acinetobacter baumannii strain USA2 plasmid pUSA2_1, complete sequence     |
| 201 | NZ_CP020594 | Acinetobacter baumannii strain USA15 plasmid pUSA15_1, complete sequence   |
| 202 | NZ_CP020596 | Acinetobacter baumannii strain HWBA8 plasmid pHWBA8_1, complete sequence   |
| 203 | NZ_CP021322 | Acinetobacter baumannii strain XH731 plasmid pXH731, complete sequence     |
| 204 | NZ_CP021327 | Acinetobacter baumannii strain XH386 plasmid pXH386, complete sequence     |
| 205 | NZ_CP021343 | Acinetobacter baumannii strain B11911 plasmid unnamed1 map unlocalized     |
| 206 | NZ_CP021344 | Acinetobacter baumannii strain B11911 plasmid pB11911, complete sequence   |
| 207 | NZ_CP021346 | Acinetobacter baumannii strain B11911 plasmid unnamed1 map unlocalized     |
| 208 | NZ_CP021348 | Acinetobacter baumannii strain B8300 plasmid pB8300, complete sequence     |
| 209 | NZ_CP021429 | Acinetobacter pittii strain HUMV-6483 plasmid p11, complete sequence       |
| 210 | NZ_CP021783 | Acinetobacter baumannii strain A85 plasmid pA85-1, complete sequence       |
| 211 | NZ_CP021784 | Acinetobacter baumannii strain A85 plasmid pA85-1a, complete sequence      |
| 212 | NZ_CP021785 | Acinetobacter baumannii strain A85 plasmid pA85-1b, complete sequence      |
| 213 | NZ_CP021786 | Acinetobacter baumannii strain A85 plasmid pA85-2, complete sequence       |
| 214 | NZ_CP021787 | Acinetobacter baumannii strain A85 plasmid pA85-3, complete sequence       |
| 215 | NZ_CP022284 | Acinetobacter baumannii strain 7804 plasmid pAba7804a, complete sequence   |
| 216 | NZ_CP022285 | Acinetobacter baumannii strain 7804 plasmid pAba7804b, complete sequence   |

|     |             |                                                                                            |
|-----|-------------|--------------------------------------------------------------------------------------------|
| 217 | NZ_CP022299 | Acinetobacter johnsonii strain IC001 plasmid pIC001A, complete sequence                    |
| 218 | NZ_CP022300 | Acinetobacter johnsonii strain IC001 plasmid pIC001B, complete sequence                    |
| 219 | NZ_CP022301 | Acinetobacter johnsonii strain IC001 plasmid pIC001C, complete sequence                    |
| 220 | NZ_CP022302 | Acinetobacter johnsonii strain IC001 plasmid pIC001D, complete sequence                    |
| 221 | NZ_CP023021 | Acinetobacter baumannii strain 9201 plasmid pAba9201a, complete sequence                   |
| 222 | NZ_CP023023 | Acinetobacter baumannii strain 10324 plasmid pAba10324a, complete sequence                 |
| 223 | NZ_CP023024 | Acinetobacter baumannii strain 10324 plasmid pAba10324b, complete sequence                 |
| 224 | NZ_CP023025 | Acinetobacter baumannii strain 10324 plasmid pAba10324c, complete sequence                 |
| 225 | NZ_CP023027 | Acinetobacter baumannii strain 10042 plasmid pAba10042a, complete sequence                 |
| 226 | NZ_CP023028 | Acinetobacter baumannii strain 10042 plasmid pAba10042b, complete sequence                 |
| 227 | NZ_CP023030 | Acinetobacter baumannii strain 9102 plasmid pAba9102a, complete sequence                   |
| 228 | NZ_CP023032 | Acinetobacter baumannii strain 7847 plasmid pAba7847a, complete sequence                   |
| 229 | NZ_CP023033 | Acinetobacter baumannii strain 7847 plasmid pAba7847b, complete sequence                   |
| 230 | NZ_CP023035 | Acinetobacter baumannii strain 5845 plasmid pAba5845a, complete sequence                   |
| 231 | NZ_CP023300 | Acinetobacter baumannii strain 11510 plasmid pAba11510b                                    |
| 232 | NZ_CP024012 | Acinetobacter sp. LoGeW2-3 plasmid unnamed1, complete sequence                             |
| 233 | NZ_CP024125 | Acinetobacter baumannii strain AYP-A2 plasmid pAYP-A2, complete sequence                   |
| 234 | NZ_CP024419 | Acinetobacter baumannii strain A388 plasmid pA388, complete sequence                       |
| 235 | NZ_CP024577 | Acinetobacter baumannii strain AbPK1 plasmid pAbPK1a, complete sequence                    |
| 236 | NZ_CP024578 | Acinetobacter baumannii strain AbPK1 plasmid pAbPK1b, complete sequence                    |
| 237 | NZ_CP025267 | Acinetobacter baumannii isolate SMC_Paed_Ab_BL01 plasmid pSMC_AB_BL01_1, complete sequence |
| 238 | NZ_CP025619 | Acinetobacter schindleri strain SGAir0122 plasmid pSGAir0122, complete sequence            |
| 239 | NZ_CP026086 | Acinetobacter pittii strain WCHAP005069 plasmid pOXA58_005069, complete sequence           |
| 240 | NZ_CP026087 | Acinetobacter pittii strain WCHAP005069 plasmid p1_005069, complete sequence               |
| 241 | NZ_CP026088 | Acinetobacter pittii strain WCHAP005069 plasmid p2_005069, complete sequence               |
| 242 | NZ_CP026126 | Acinetobacter baumannii strain ABNIH28 plasmid pABA-6973, complete sequence                |
| 243 | NZ_CP026127 | Acinetobacter baumannii strain ABNIH28 plasmid pNDM-0285, complete sequence                |
| 244 | NZ_CP026128 | Acinetobacter baumannii strain ABNIH28 plasmid pABA-1fe1, complete sequence                |
| 245 | NZ_CP026129 | Acinetobacter baumannii strain ABNIH28 plasmid pABA-2f10, complete sequence                |
| 246 | NZ_CP026339 | Acinetobacter baumannii strain 810CP plasmid pAba810CPb, complete sequence                 |
| 247 | NZ_CP026340 | Acinetobacter baumannii strain 810CP plasmid pAba810CPa, complete sequence                 |
| 248 | NZ_CP026413 | Acinetobacter sp. ACNIH2 plasmid pACI-35f6, complete sequence                              |

|     |             |                                                                                     |
|-----|-------------|-------------------------------------------------------------------------------------|
| 249 | NZ_CP026414 | Acinetobacter sp. ACNIH2 plasmid pACI-235c, complete sequence                       |
| 250 | NZ_CP026415 | Acinetobacter sp. ACNIH2 plasmid pACI-55cf, complete sequence                       |
| 251 | NZ_CP026416 | Acinetobacter sp. ACNIH2 plasmid pACI-3569, complete sequence                       |
| 252 | NZ_CP026417 | Acinetobacter sp. ACNIH2 plasmid pACI-c6b4, complete sequence                       |
| 253 | NZ_CP026418 | Acinetobacter sp. ACNIH2 plasmid pKPC-8dee, complete sequence                       |
| 254 | NZ_CP026419 | Acinetobacter sp. ACNIH2 plasmid pACI-6db8, complete sequence                       |
| 255 | NZ_CP026421 | Acinetobacter sp. ACNIH1 plasmid pACI-3bd5, complete sequence                       |
| 256 | NZ_CP026422 | Acinetobacter sp. ACNIH1 plasmid pACI-a283, complete sequence                       |
| 257 | NZ_CP026423 | Acinetobacter sp. ACNIH1 plasmid pACI-b25a, complete sequence                       |
| 258 | NZ_CP026424 | Acinetobacter sp. ACNIH1 plasmid pACI-148e, complete sequence                       |
| 259 | NZ_CP026425 | Acinetobacter sp. ACNIH1 plasmid pNDM-9c17, complete sequence                       |
| 260 | NZ_CP026426 | Acinetobacter sp. ACNIH1 plasmid pACI-df08, complete sequence                       |
| 261 | NZ_CP026427 | Acinetobacter sp. ACNIH1 plasmid unnamed, complete sequence                         |
| 262 | NZ_CP026617 | Acinetobacter sp. SWBY1 plasmid pSWBY1, complete sequence                           |
| 263 | NZ_CP026705 | Acinetobacter baumannii strain AR_0056 plasmid tig00000058_pilon, complete sequence |
| 264 | NZ_CP026706 | Acinetobacter baumannii strain AR_0056 plasmid tig00000059_pilon, complete sequence |
| 265 | NZ_CP026708 | Acinetobacter baumannii strain AR_0056 plasmid tig00000534_pilon, complete sequence |
| 266 | NZ_CP026712 | Acinetobacter baumannii strain AR_0063 plasmid unitig_2_pilon, complete sequence    |
| 267 | NZ_CP026748 | Acinetobacter baumannii strain WCHAB005133 plasmid p1_005133, complete sequence     |
| 268 | NZ_CP026749 | Acinetobacter baumannii strain WCHAB005133 plasmid pOXA58_005133, complete sequence |
| 269 | NZ_CP026944 | Acinetobacter baumannii strain S1, AB1A2 plasmid pAbS1_01                           |
| 270 | NZ_CP026945 | Acinetobacter baumannii strain S1, AB1A2 plasmid pAbS1_02                           |
| 271 | NZ_CP026946 | Acinetobacter baumannii strain S1, AB1A2 plasmid pAbS1_03                           |
| 272 | NZ_CP027121 | Acinetobacter baumannii strain AR_0056 plasmid unnamed2, complete sequence          |
| 273 | NZ_CP027122 | Acinetobacter baumannii strain AR_0056 plasmid unnamed1, complete sequence          |
| 274 | NZ_CP027124 | Acinetobacter baumannii strain AR_0056 plasmid unnamed3, complete sequence          |
| 275 | NZ_CP027179 | Acinetobacter baumannii strain AR_0070 plasmid unnamed1, complete sequence          |
| 276 | NZ_CP027180 | Acinetobacter baumannii strain AR_0070 plasmid unnamed2, complete sequence          |
| 277 | NZ_CP027181 | Acinetobacter baumannii strain AR_0070 plasmid unnamed3, complete sequence          |
| 278 | NZ_CP027182 | Acinetobacter baumannii strain AR_0070 plasmid unnamed4, complete sequence          |



|     |             |                                                                                       |
|-----|-------------|---------------------------------------------------------------------------------------|
| 279 | NZ_CP027184 | Acinetobacter baumannii strain AR_0052 plasmid unnamed2, complete sequence            |
| 280 | NZ_CP027185 | Acinetobacter baumannii strain AR_0052 plasmid unnamed1, complete sequence            |
| 281 | NZ_CP027186 | Acinetobacter baumannii strain AR_0052 plasmid unnamed4                               |
| 282 | NZ_CP027187 | Acinetobacter baumannii strain AR_0052 plasmid unnamed3, complete sequence            |
| 283 | NZ_CP027243 | Acinetobacter baumannii strain WCHAB005078 plasmid p1_005078, complete sequence       |
| 284 | NZ_CP027244 | Acinetobacter baumannii strain WCHAB005078 plasmid p2_005078, complete sequence       |
| 285 | NZ_CP027245 | Acinetobacter baumannii strain WCHAB005078 plasmid pOXA58_005078, complete sequence   |
| 286 | NZ_CP027247 | Acinetobacter pittii strain WCHAP100004 plasmid p1_100004, complete sequence          |
| 287 | NZ_CP027248 | Acinetobacter pittii strain WCHAP100004 plasmid p2_100004, complete sequence          |
| 288 | NZ_CP027249 | Acinetobacter pittii strain WCHAP100004 plasmid pOXA58_100004, complete sequence      |
| 289 | NZ_CP027251 | Acinetobacter pittii strain WCHAP100020 plasmid p1_100020, complete sequence          |
| 290 | NZ_CP027252 | Acinetobacter pittii strain WCHAP100020 plasmid p2_100020, complete sequence          |
| 291 | NZ_CP027253 | Acinetobacter pittii strain WCHAP100020 plasmid pOXA58_100020, complete sequence      |
| 292 | NZ_CP027483 | Acinetobacter baumannii strain I43 plasmid pABI43, complete sequence                  |
| 293 | NZ_CP027529 | Acinetobacter baumannii strain AR_0083 plasmid unnamed, complete sequence             |
| 294 | NZ_CP027531 | Acinetobacter baumannii strain AR_0088 plasmid unnamed1, complete sequence            |
| 295 | NZ_CP027532 | Acinetobacter baumannii strain AR_0088 plasmid unnamed2, complete sequence            |
| 296 | NZ_CP027608 | Acinetobacter baumannii strain AR_0102 plasmid unnamed1, complete sequence            |
| 297 | NZ_CP027609 | Acinetobacter baumannii strain AR_0102 plasmid unnamed2, complete sequence            |
| 298 | NZ_CP027610 | Acinetobacter baumannii strain AR_0101 plasmid unnamed, complete sequence             |
| 299 | NZ_CP028139 | Acinetobacter baumannii strain NCIMB 8209 plasmid pAbNCIMB8209_134, complete sequence |
| 300 | NZ_CP028556 | Acinetobacter sp. WCHA45 plasmid p1_010045, complete sequence                         |
| 301 | NZ_CP028557 | Acinetobacter sp. WCHA45 plasmid p2_010045, complete sequence                         |
| 302 | NZ_CP028558 | Acinetobacter sp. WCHA45 plasmid p3_010045, complete sequence                         |
| 303 | NZ_CP028559 | Acinetobacter sp. WCHA45 plasmid p4_010045, complete sequence                         |
| 304 | NZ_CP028560 | Acinetobacter sp. WCHA45 plasmid pNDM1_010045, complete sequence                      |
| 305 | NZ_CP028569 | Acinetobacter pittii strain WCHAP005046 plasmid p1_005046, complete sequence          |
| 306 | NZ_CP028570 | Acinetobacter pittii strain WCHAP005046 plasmid p2_005046, complete sequence          |
| 307 | NZ_CP028571 | Acinetobacter pittii strain WCHAP005046 plasmid p3_005046, complete sequence          |
| 308 | NZ_CP028572 | Acinetobacter pittii strain WCHAP005046 plasmid p4_005046, complete sequence          |

|     |             |                                                                                  |
|-----|-------------|----------------------------------------------------------------------------------|
| 309 | NZ_CP028573 | Acinetobacter pittii strain WCHAP005046 plasmid pOXA58_005046, complete sequence |
| 310 | NZ_CP028798 | Acinetobacter junii strain WCHAJ59 plasmid p1_010059, complete sequence          |
| 311 | NZ_CP028799 | Acinetobacter junii strain WCHAJ59 plasmid p2_010059, complete sequence          |
| 312 | NZ_CP029389 | Acinetobacter defluvii strain WCHA30 plasmid p1_010030, complete sequence        |
| 313 | NZ_CP029390 | Acinetobacter defluvii strain WCHA30 plasmid p2_010030, complete sequence        |
| 314 | NZ_CP029391 | Acinetobacter defluvii strain WCHA30 plasmid p3_010030, complete sequence        |
| 315 | NZ_CP029392 | Acinetobacter defluvii strain WCHA30 plasmid p4_010030, complete sequence        |
| 316 | NZ_CP029393 | Acinetobacter defluvii strain WCHA30 plasmid p5_010030, complete sequence        |
| 317 | NZ_CP029394 | Acinetobacter defluvii strain WCHA30 plasmid p6_010030, complete sequence        |
| 318 | NZ_CP029395 | Acinetobacter defluvii strain WCHA30 plasmid p7_010030, complete sequence        |
| 319 | NZ_CP029396 | Acinetobacter defluvii strain WCHA30 plasmid pOXA58_010030, complete sequence    |
| 320 | NZ_CP029570 | Acinetobacter baumannii strain DA33098 plasmid pDA33098-108, complete sequence   |
| 321 | NZ_CP029571 | Acinetobacter baumannii strain DA33098 plasmid pDA33098-71, complete sequence    |
| 322 | NZ_CP029572 | Acinetobacter baumannii strain DA33098 plasmid pDA33098-9-2, complete sequence   |
| 323 | NZ_CP029573 | Acinetobacter baumannii strain DA33098 plasmid pDA33098-9, complete sequence     |
| 324 | NZ_CP029611 | Acinetobacter pittii strain ST220 plasmid unnamed, complete sequence             |
| 325 | NZ_CP030084 | Acinetobacter baumannii strain Aba plasmid unnamed1, complete sequence           |
| 326 | NZ_CP030107 | Acinetobacter baumannii strain DA33382 plasmid pDA33382-2-2, complete sequence   |
| 327 | NZ_CP030108 | Acinetobacter baumannii strain DA33382 plasmid pDA33382-2, complete sequence     |
| 328 | NZ_CP030109 | Acinetobacter baumannii strain DA33382 plasmid pDA33382-85, complete sequence    |
| 329 | NZ_CP030755 | Acinetobacter schindleri strain H3 plasmid unnamed1, complete sequence           |
| 330 | NZ_CP030756 | Acinetobacter schindleri strain H3 plasmid unnamed2, complete sequence           |
| 331 | NZ_CP030757 | Acinetobacter schindleri strain H3 plasmid unnamed3, complete sequence           |
| 332 | NZ_CP030758 | Acinetobacter schindleri strain H3 plasmid unnamed4, complete sequence           |
| 333 | NZ_CP031381 | Acinetobacter baumannii ACICU plasmid pACICU1, complete sequence                 |
| 334 | NZ_CP031382 | Acinetobacter baumannii ACICU plasmid pACICU2, complete sequence                 |
| 335 | NZ_CP031445 | Acinetobacter baumannii strain MDR-UNC plasmid unnamed1, complete sequence       |
| 336 | NZ_CP031446 | Acinetobacter baumannii strain MDR-UNC plasmid pAB120, complete sequence         |
| 337 | NZ_CP031709 | Acinetobacter wuhouensis strain WCHA60 plasmid p1_010060, complete sequence      |
| 338 | NZ_CP031710 | Acinetobacter wuhouensis strain WCHA60 plasmid p2_010060, complete sequence      |
| 339 | NZ_CP031711 | Acinetobacter wuhouensis strain WCHA60 plasmid p3_010060, complete sequence      |
| 340 | NZ_CP031712 | Acinetobacter wuhouensis strain WCHA60 plasmid p4_010060, complete sequence      |

|     |             |                                                                                       |
|-----|-------------|---------------------------------------------------------------------------------------|
| 341 | NZ_CP031713 | Acinetobacter wuhouensis strain WCHA60 plasmid p5_010060, complete sequence           |
| 342 | NZ_CP031714 | Acinetobacter wuhouensis strain WCHA60 plasmid p6_010060, complete sequence           |
| 343 | NZ_CP031715 | Acinetobacter wuhouensis strain WCHA60 plasmid p7_010060, complete sequence           |
| 344 | NZ_CP031973 | Acinetobacter haemolyticus strain AN59 plasmid pAhaemAN59c, complete sequence         |
| 345 | NZ_CP031974 | Acinetobacter haemolyticus strain AN59 plasmid pAhaemAN59b, complete sequence         |
| 346 | NZ_CP031975 | Acinetobacter haemolyticus strain AN59 plasmid pAhaemAN59a, complete sequence         |
| 347 | NZ_CP031977 | Acinetobacter haemolyticus strain AN43 plasmid pAhaemAN43b, complete sequence         |
| 348 | NZ_CP031978 | Acinetobacter haemolyticus strain AN43 plasmid pAhaemAN43a                            |
| 349 | NZ_CP031980 | Acinetobacter haemolyticus strain AN4 plasmid pAhaemAN4d, complete sequence           |
| 350 | NZ_CP031981 | Acinetobacter haemolyticus strain AN4 plasmid pAhaemAN4c, complete sequence           |
| 351 | NZ_CP031982 | Acinetobacter haemolyticus strain AN4 plasmid pAhaemAN4b, complete sequence           |
| 352 | NZ_CP031983 | Acinetobacter haemolyticus strain AN4 plasmid pAhaemAN4a, complete sequence           |
| 353 | NZ_CP031985 | Acinetobacter haemolyticus strain AN3 plasmid pAhaemAN3c, complete sequence           |
| 354 | NZ_CP031986 | Acinetobacter haemolyticus strain AN3 plasmid pAhaemAN3b, complete sequence           |
| 355 | NZ_CP031987 | Acinetobacter haemolyticus strain AN3 plasmid pAhaemAN3a, complete sequence           |
| 356 | NZ_CP031989 | Acinetobacter haemolyticus strain 5227 plasmid pAhaem5227b, complete sequence         |
| 357 | NZ_CP031990 | Acinetobacter haemolyticus strain 5227 plasmid pAhaem5227a, complete sequence         |
| 358 | NZ_CP031992 | Acinetobacter haemolyticus strain 2126ch plasmid pAhaem2126chf, complete sequence     |
| 359 | NZ_CP031993 | Acinetobacter haemolyticus strain 2126ch plasmid pAhaem2126che, complete sequence     |
| 360 | NZ_CP031994 | Acinetobacter haemolyticus strain 2126ch plasmid pAhaem2126chd, complete sequence     |
| 361 | NZ_CP031995 | Acinetobacter haemolyticus strain 2126ch plasmid pAhaem2126chc, complete sequence     |
| 362 | NZ_CP031996 | Acinetobacter haemolyticus strain 2126ch plasmid pAhaem2126chb, complete sequence     |
| 363 | NZ_CP031997 | Acinetobacter haemolyticus strain 2126ch plasmid pAhaem2126cha, complete sequence     |
| 364 | NZ_CP031999 | Acinetobacter haemolyticus strain INNSZ174 plasmid pAhaemINNSZ174c, complete sequence |
| 365 | NZ_CP032000 | Acinetobacter haemolyticus strain INNSZ174 plasmid pAhaemINNSZ174b, complete sequence |
| 366 | NZ_CP032001 | Acinetobacter haemolyticus strain INNSZ174 plasmid pAhaemINNSZ174a, complete sequence |
| 367 | NZ_CP032003 | Acinetobacter haemolyticus strain 11616 plasmid pAhaem11616f, complete sequence       |
| 368 | NZ_CP032004 | Acinetobacter haemolyticus strain 11616 plasmid pAhaem11616e, complete sequence       |
| 369 | NZ_CP032005 | Acinetobacter haemolyticus strain 11616 plasmid pAhaem11616c, complete sequence       |
| 370 | NZ_CP032006 | Acinetobacter haemolyticus strain 11616 plasmid pAhaem11616d                          |
| 371 | NZ_CP032007 | Acinetobacter haemolyticus strain 11616 plasmid pAhaem11616b, complete sequence       |

|     |             |                                                                                     |
|-----|-------------|-------------------------------------------------------------------------------------|
| 372 | NZ_CP032008 | Acinetobacter haemolyticus strain 11616 plasmid pAhaem11616a, complete sequence     |
| 373 | NZ_CP032102 | Acinetobacter lwoffii strain EK30A plasmid pALWEK1.1, complete sequence             |
| 374 | NZ_CP032103 | Acinetobacter lwoffii strain EK30A plasmid pALWEK1.10, complete sequence            |
| 375 | NZ_CP032104 | Acinetobacter lwoffii strain EK30A plasmid pALWEK1.11, complete sequence            |
| 376 | NZ_CP032105 | Acinetobacter lwoffii strain EK30A plasmid pALWEK1.2, complete sequence             |
| 377 | NZ_CP032106 | Acinetobacter lwoffii strain EK30A plasmid pALWEK1.3, complete sequence             |
| 378 | NZ_CP032107 | Acinetobacter lwoffii strain EK30A plasmid pALWEK1.4, complete sequence             |
| 379 | NZ_CP032108 | Acinetobacter lwoffii strain EK30A plasmid pALWEK1.6, complete sequence             |
| 380 | NZ_CP032109 | Acinetobacter lwoffii strain EK30A plasmid pALWEK1.7, complete sequence             |
| 381 | NZ_CP032110 | Acinetobacter lwoffii strain EK30A plasmid pALWEK1.8, complete sequence             |
| 382 | NZ_CP032111 | Acinetobacter lwoffii strain EK30A plasmid pALWEK1.9, complete sequence             |
| 383 | NZ_CP032112 | Acinetobacter lwoffii strain ED23-35 plasmid pALWED1.2, complete sequence           |
| 384 | NZ_CP032113 | Acinetobacter lwoffii strain ED23-35 plasmid pALWED1.4, complete sequence           |
| 385 | NZ_CP032114 | Acinetobacter lwoffii strain ED23-35 plasmid pALWED1.5, complete sequence           |
| 386 | NZ_CP032115 | Acinetobacter lwoffii strain ED23-35 plasmid pALWED1.6, complete sequence           |
| 387 | NZ_CP032116 | Acinetobacter lwoffii strain ED23-35 plasmid pALWED1.7, complete sequence           |
| 388 | NZ_CP032117 | Acinetobacter lwoffii strain ED45-23 plasmid pALWED2.2, complete sequence           |
| 389 | NZ_CP032118 | Acinetobacter lwoffii strain ED45-23 plasmid pALWED2.3, complete sequence           |
| 390 | NZ_CP032119 | Acinetobacter lwoffii strain ED45-23 plasmid pALWED2.4, complete sequence           |
| 391 | NZ_CP032120 | Acinetobacter lwoffii strain ED45-23 plasmid pALWED2.5, complete sequence           |
| 392 | NZ_CP032121 | Acinetobacter lwoffii strain ED45-23 plasmid pALWED2.6, complete sequence           |
| 393 | NZ_CP032122 | Acinetobacter lwoffii strain ED45-23 plasmid pALWED2.7, complete sequence           |
| 394 | NZ_CP032123 | Acinetobacter lwoffii strain ED45-23 plasmid pALWED2.8, complete sequence           |
| 395 | NZ_CP032124 | Acinetobacter lwoffii strain ED45-23 plasmid pALWED2.9, complete sequence           |
| 396 | NZ_CP032127 | Acinetobacter chinensis strain WCHAc010005 plasmid p1_010005, complete sequence     |
| 397 | NZ_CP032128 | Acinetobacter chinensis strain WCHAc010005 plasmid p2_010005, complete sequence     |
| 398 | NZ_CP032129 | Acinetobacter chinensis strain WCHAc010005 plasmid p3_010005, complete sequence     |
| 399 | NZ_CP032130 | Acinetobacter chinensis strain WCHAc010005 plasmid p4_010005, complete sequence     |
| 400 | NZ_CP032131 | Acinetobacter chinensis strain WCHAc010005 plasmid p5_010005, complete sequence     |
| 401 | NZ_CP032132 | Acinetobacter chinensis strain WCHAc010005 plasmid pNDM1_010005, complete sequence  |
| 402 | NZ_CP032133 | Acinetobacter chinensis strain WCHAc010005 plasmid pOXA58_010005, complete sequence |
| 403 | NZ_CP032138 | Acinetobacter sp. WCHAc010052 plasmid p1_010052, complete sequence                  |

|     |             |                                                                          |
|-----|-------------|--------------------------------------------------------------------------|
| 404 | NZ_CP032139 | Acinetobacter sp. WCHAc010052 plasmid p2_010052, complete sequence       |
| 405 | NZ_CP032140 | Acinetobacter sp. WCHAc010052 plasmid p3_010052, complete sequence       |
| 406 | NZ_CP032141 | Acinetobacter sp. WCHAc010052 plasmid p4_010052, complete sequence       |
| 407 | NZ_CP032142 | Acinetobacter sp. WCHAc010052 plasmid pNDM1_010052, complete sequence    |
| 408 | NZ_CP032216 | Acinetobacter baumannii strain UPAB1 plasmid pAB5 map unlocalized        |
| 409 | NZ_CP032217 | Acinetobacter baumannii strain UPAB1 plasmid unnamed1                    |
| 410 | NZ_CP032218 | Acinetobacter baumannii strain UPAB1 plasmid pAB5 map unlocalized        |
| 411 | NZ_CP032219 | Acinetobacter baumannii strain UPAB1 plasmid pAB5 map unlocalized        |
| 412 | NZ_CP032220 | Acinetobacter baumannii strain UPAB1 plasmid unnamed2                    |
| 413 | NZ_CP032267 | Acinetobacter sp. WCHAc010034 plasmid p10_010034, complete sequence      |
| 414 | NZ_CP032268 | Acinetobacter sp. WCHAc010034 plasmid p1_010034, complete sequence       |
| 415 | NZ_CP032269 | Acinetobacter sp. WCHAc010034 plasmid p11_010034, complete sequence      |
| 416 | NZ_CP032270 | Acinetobacter sp. WCHAc010034 plasmid p2_010034, complete sequence       |
| 417 | NZ_CP032271 | Acinetobacter sp. WCHAc010034 plasmid p3_010034, complete sequence       |
| 418 | NZ_CP032272 | Acinetobacter sp. WCHAc010034 plasmid p4_010034, complete sequence       |
| 419 | NZ_CP032273 | Acinetobacter sp. WCHAc010034 plasmid p5_010034, complete sequence       |
| 420 | NZ_CP032274 | Acinetobacter sp. WCHAc010034 plasmid p6_010034, complete sequence       |
| 421 | NZ_CP032275 | Acinetobacter sp. WCHAc010034 plasmid p7_010034, complete sequence       |
| 422 | NZ_CP032276 | Acinetobacter sp. WCHAc010034 plasmid p8_010034, complete sequence       |
| 423 | NZ_CP032277 | Acinetobacter sp. WCHAc010034 plasmid p9_010034, complete sequence       |
| 424 | NZ_CP032278 | Acinetobacter sp. WCHAc010034 plasmid pNDM1_010034, complete sequence    |
| 425 | NZ_CP032280 | Acinetobacter sp. WCHA55 plasmid p1_010055, complete sequence            |
| 426 | NZ_CP032281 | Acinetobacter sp. WCHA55 plasmid p2_010055, complete sequence            |
| 427 | NZ_CP032282 | Acinetobacter sp. WCHA55 plasmid p3_010055, complete sequence            |
| 428 | NZ_CP032283 | Acinetobacter sp. WCHA55 plasmid p4_010055, complete sequence            |
| 429 | NZ_CP032284 | Acinetobacter sp. WCHA55 plasmid pNDM1_010055, complete sequence         |
| 430 | NZ_CP032285 | Acinetobacter sp. WCHA55 plasmid pOXA58_010055, complete sequence        |
| 431 | NZ_CP032287 | Acinetobacter lwoffii strain ED9-5a plasmid pALWED3.2, complete sequence |
| 432 | NZ_CP032288 | Acinetobacter lwoffii strain ED9-5a plasmid pALWED3.3, complete sequence |
| 433 | NZ_CP032289 | Acinetobacter lwoffii strain ED9-5a plasmid pALWED3.4, complete sequence |
| 434 | NZ_CP032290 | Acinetobacter lwoffii strain ED9-5a plasmid pALWED3.6, complete sequence |
| 435 | NZ_CP032741 | Acinetobacter baumannii strain C25 plasmid unnamed1                      |

|     |             |                                                                                       |
|-----|-------------|---------------------------------------------------------------------------------------|
| 436 | NZ_CP032742 | Acinetobacter baumannii strain C25 plasmid unnamed2                                   |
| 437 | NZ_CP033118 | Acinetobacter wuhouensis strain WCHAW010062 plasmid p10_010062, complete sequence     |
| 438 | NZ_CP033119 | Acinetobacter wuhouensis strain WCHAW010062 plasmid p1_010062, complete sequence      |
| 439 | NZ_CP033120 | Acinetobacter wuhouensis strain WCHAW010062 plasmid p11_010062, complete sequence     |
| 440 | NZ_CP033121 | Acinetobacter wuhouensis strain WCHAW010062 plasmid p12_010062, complete sequence     |
| 441 | NZ_CP033122 | Acinetobacter wuhouensis strain WCHAW010062 plasmid p2_010062, complete sequence      |
| 442 | NZ_CP033123 | Acinetobacter wuhouensis strain WCHAW010062 plasmid p3_010062, complete sequence      |
| 443 | NZ_CP033124 | Acinetobacter wuhouensis strain WCHAW010062 plasmid p4_010062, complete sequence      |
| 444 | NZ_CP033125 | Acinetobacter wuhouensis strain WCHAW010062 plasmid p5_010062, complete sequence      |
| 445 | NZ_CP033126 | Acinetobacter wuhouensis strain WCHAW010062 plasmid p6_010062, complete sequence      |
| 446 | NZ_CP033127 | Acinetobacter wuhouensis strain WCHAW010062 plasmid p7_010062, complete sequence      |
| 447 | NZ_CP033128 | Acinetobacter wuhouensis strain WCHAW010062 plasmid p8_010062, complete sequence      |
| 448 | NZ_CP033129 | Acinetobacter wuhouensis strain WCHAW010062 plasmid p9_010062, complete sequence      |
| 449 | NZ_CP033130 | Acinetobacter wuhouensis strain WCHAW010062 plasmid pOXA23_010062, complete sequence  |
| 450 | NZ_CP033131 | Acinetobacter wuhouensis strain WCHAW010062 plasmid pOXA58_010062, complete sequence  |
| 451 | NZ_CP033132 | Acinetobacter wuhouensis strain WCHAW010062 plasmid pOXA653_010062, complete sequence |
| 452 | NZ_CP033244 | Acinetobacter baumannii strain 7835 plasmid pAba7835a, complete sequence              |
| 453 | NZ_CP033245 | Acinetobacter baumannii strain 7835 plasmid pAba7835b, complete sequence              |
| 454 | NZ_CP033751 | Acinetobacter baumannii strain FDAARGOS_540 plasmid unnamed3                          |
| 455 | NZ_CP033752 | Acinetobacter baumannii strain FDAARGOS_540 plasmid unnamed2, complete sequence       |
| 456 | NZ_CP033753 | Acinetobacter baumannii strain FDAARGOS_540 plasmid unnamed1, complete sequence       |
| 457 | NZ_CP033769 | Acinetobacter baumannii strain FDAARGOS_533 plasmid unnamed1, complete sequence       |
| 458 | NZ_CP033770 | Acinetobacter baumannii strain FDAARGOS_533 plasmid unnamed2, complete sequence       |

|     |             |                                                                                   |
|-----|-------------|-----------------------------------------------------------------------------------|
| 459 | NZ_CP033857 | Acinetobacter sp. FDAARGOS_493 plasmid unnamed1, complete sequence                |
| 460 | NZ_CP033859 | Acinetobacter sp. FDAARGOS_493 plasmid unnamed2                                   |
| 461 | NZ_CP033860 | Acinetobacter sp. FDAARGOS_493 plasmid unnamed3, complete sequence                |
| 462 | NZ_CP033863 | Acinetobacter sp. FDAARGOS_560 plasmid unnamed1                                   |
| 463 | NZ_CP033864 | Acinetobacter sp. FDAARGOS_560 plasmid unnamed2                                   |
| 464 | NZ_CP033867 | Acinetobacter sp. FDAARGOS_494 plasmid unnamed                                    |
| 465 | NZ_CP033870 | Acinetobacter baumannii strain MRSN15313 plasmid p597A-6.7, complete sequence     |
| 466 | NZ_CP033871 | Acinetobacter baumannii strain MRSN15313 plasmid p597A-14.8, complete sequence    |
| 467 | NZ_CP033872 | Acinetobacter baumannii strain MRSN15313 plasmid pAb-MCR4.3, complete sequence    |
| 468 | NZ_CP034093 | Acinetobacter baumannii strain A52 plasmid pA52-1, complete sequence              |
| 469 | NZ_CP034094 | Acinetobacter baumannii strain A52 plasmid pA52-2, complete sequence              |
| 470 | NZ_CP034095 | Acinetobacter baumannii strain A52 plasmid pA52-3, complete sequence              |
| 471 | NZ_CP034096 | Acinetobacter baumannii strain A52 plasmid pA52-4, complete sequence              |
| 472 | NZ_CP034097 | Acinetobacter baumannii strain A52 plasmid pA52-OXA-72, complete sequence         |
| 473 | NZ_CP035044 | Acinetobacter baumannii strain ABUH796 plasmid p13.0Kbp, complete sequence        |
| 474 | NZ_CP035046 | Acinetobacter baumannii strain ABUH793 plasmid p107.0Kbp, complete sequence       |
| 475 | NZ_CP035047 | Acinetobacter baumannii strain ABUH793 plasmid p74.1Kbp, complete sequence        |
| 476 | NZ_CP035048 | Acinetobacter baumannii strain ABUH793 plasmid p10.9Kbp, complete sequence        |
| 477 | NZ_CP035050 | Acinetobacter baumannii strain ABUH773 plasmid p11.8Kbp, complete sequence        |
| 478 | NZ_CP035052 | Acinetobacter baumannii strain ABUH763 plasmid p74.1Kbp, complete sequence        |
| 479 | NZ_CP035053 | Acinetobacter baumannii strain ABUH763 plasmid p11.0Kbp, complete sequence        |
| 480 | NZ_CP035935 | Acinetobacter cumulans strain WCHAc060092 plasmid pNDM1_060092, complete sequence |
| 481 | NZ_CP035936 | Acinetobacter cumulans strain WCHAc060092 plasmid p1_060092, complete sequence    |
| 482 | NZ_CP035937 | Acinetobacter cumulans strain WCHAc060092 plasmid p2_060092, complete sequence    |
| 483 | NZ_CP035938 | Acinetobacter cumulans strain WCHAc060092 plasmid p3_060092, complete sequence    |
| 484 | NZ_CP035939 | Acinetobacter cumulans strain WCHAc060092 plasmid p4_060092, complete sequence    |
| 485 | NZ_CP035940 | Acinetobacter cumulans strain WCHAc060092 plasmid p5_060092, complete sequence    |
| 486 | NZ_CP035941 | Acinetobacter cumulans strain WCHAc060092 plasmid p6_060092, complete sequence    |
| 487 | NZ_CP035942 | Acinetobacter cumulans strain WCHAc060092 plasmid p7_060092, complete sequence    |
| 488 | NZ_CP035943 | Acinetobacter cumulans strain WCHAc060092 plasmid p8_060092, complete sequence    |
| 489 | NZ_CP036284 | Acinetobacter baumannii strain TG60155 plasmid p60155_1, complete sequence        |
| 490 | NZ_CP036285 | Acinetobacter baumannii strain TG60155 plasmid p60155_2, complete sequence        |

|     |             |                                                                                   |
|-----|-------------|-----------------------------------------------------------------------------------|
| 491 | NZ_CP036286 | Acinetobacter baumannii strain TG60155 plasmid p60155_3, complete sequence        |
| 492 | NZ_CP037425 | Acinetobacter johnsonii strain M19 plasmid pFM-M19, complete sequence             |
| 493 | NZ_CP038010 | Acinetobacter haemolyticus strain TJR01 plasmid pAHTJR1, complete sequence        |
| 494 | NZ_CP038011 | Acinetobacter haemolyticus strain TJR01 plasmid pAHTJR2, complete sequence        |
| 495 | NZ_CP038023 | Acinetobacter radioresistens strain DD78 plasmid pAR1, complete sequence          |
| 496 | NZ_CP038024 | Acinetobacter radioresistens strain DD78 plasmid pAR2, complete sequence          |
| 497 | NZ_CP038025 | Acinetobacter radioresistens strain DD78 plasmid pAR3, complete sequence          |
| 498 | NZ_CP038259 | Acinetobacter baumannii strain 39741 plasmid pEH_gr13, complete sequence          |
| 499 | NZ_CP038260 | Acinetobacter baumannii strain 39741 plasmid pEH_gr3, complete sequence           |
| 500 | NZ_CP038261 | Acinetobacter baumannii strain 39741 plasmid pEH_mcr4.3, complete sequence        |
| 501 | NZ_CP038263 | Acinetobacter baumannii strain LEV1449/17Ec plasmid pEC_gr13, complete sequence   |
| 502 | NZ_CP038264 | Acinetobacter baumannii strain LEV1449/17Ec plasmid pEC_gr6, complete sequence    |
| 503 | NZ_CP038265 | Acinetobacter baumannii strain LEV1449/17Ec plasmid pEC_mcr4.3, complete sequence |
| 504 | NZ_CP038501 | Acinetobacter baumannii strain CIAT758 plasmid unnamed1, complete sequence        |
| 505 | NZ_CP038502 | Acinetobacter baumannii strain CIAT758 plasmid unnamed2, complete sequence        |
| 506 | NZ_CP038503 | Acinetobacter baumannii strain CIAT758 plasmid unnamed3, complete sequence        |
| 507 | NZ_CP038645 | Acinetobacter baumannii strain ACN21 plasmid unnamed1, complete sequence          |
| 508 | NZ_CP038646 | Acinetobacter baumannii strain ACN21 plasmid unnamed2, complete sequence          |
| 509 | NZ_CP038647 | Acinetobacter baumannii strain ACN21 plasmid unnamed3, complete sequence          |
| 510 | NZ_CP038648 | Acinetobacter baumannii strain ACN21 plasmid unnamed4, complete sequence          |
| 511 | NZ_CP038649 | Acinetobacter baumannii strain ACN21 plasmid unnamed5, complete sequence          |
| 512 | NZ_CP038650 | Acinetobacter baumannii strain ACN21 plasmid unnamed6, complete sequence          |
| 513 | NZ_CP038651 | Acinetobacter baumannii strain ACN21 plasmid unnamed7, complete sequence          |
| 514 | NZ_CP038652 | Acinetobacter baumannii strain ACN21 plasmid unnamed8, complete sequence          |
| 515 | NZ_CP039024 | Acinetobacter baumannii ATCC 17978 substr. PMR-High plasmid unnamed1              |
| 516 | NZ_CP039026 | Acinetobacter baumannii ATCC 17978 substr. PMR-High plasmid unnamed2              |
| 517 | NZ_CP039027 | Acinetobacter baumannii ATCC 17978 substr. Lab-WT plasmid unnamed1                |
| 518 | NZ_CP039029 | Acinetobacter baumannii ATCC 17978 substr. Lab-WT plasmid unnamed2                |
| 519 | NZ_CP039030 | Acinetobacter baumannii ATCC 17978 substr. Lab-WT plasmid unnamed3                |
| 520 | NZ_CP039144 | Acinetobacter sp. 10FS3-1 plasmid p10FS3-1-1, complete sequence                   |
| 521 | NZ_CP039145 | Acinetobacter sp. 10FS3-1 plasmid p10FS3-1-2, complete sequence                   |
| 522 | NZ_CP039146 | Acinetobacter sp. 10FS3-1 plasmid p10FS3-1-3, complete sequence                   |



|     |             |                                                                              |
|-----|-------------|------------------------------------------------------------------------------|
| 523 | NZ_CP039147 | Acinetobacter sp. 10FS3-1 plasmid p10FS3-1-4, complete sequence              |
| 524 | NZ_CP039148 | Acinetobacter sp. 10FS3-1 plasmid p10FS3-1-5, complete sequence              |
| 525 | NZ_CP039149 | Acinetobacter sp. 10FS3-1 plasmid p10FS3-1-6, complete sequence              |
| 526 | NZ_CP039150 | Acinetobacter sp. 10FS3-1 plasmid p10FS3-1-7, complete sequence              |
| 527 | NZ_CP039151 | Acinetobacter sp. 10FS3-1 plasmid p10FS3-1-8, complete sequence              |
| 528 | NZ_CP039152 | Acinetobacter sp. 10FS3-1 plasmid p10FS3-1-9, complete sequence              |
| 529 | NZ_CP039153 | Acinetobacter sp. 10FS3-1 plasmid p10FS3-1-10, complete sequence             |
| 530 | NZ_CP039154 | Acinetobacter sp. 10FS3-1 plasmid p10FS3-1-11, complete sequence             |
| 531 | NZ_CP039155 | Acinetobacter sp. 10FS3-1 plasmid p10FS3-1-12, complete sequence             |
| 532 | NZ_CP039342 | Acinetobacter baumannii strain TG31986 plasmid pTG31986, complete sequence   |
| 533 | NZ_CP039344 | Acinetobacter baumannii strain TG31302 plasmid pTG31302, complete sequence   |
| 534 | NZ_CP039519 | Acinetobacter baumannii strain TG22653 plasmid pTG22653, complete sequence   |
| 535 | NZ_CP039521 | Acinetobacter baumannii strain TG22627 plasmid pTG22627, complete sequence   |
| 536 | NZ_CP039931 | Acinetobacter baumannii strain TG29392 plasmid pTG29392_1, complete sequence |
| 537 | NZ_CP039932 | Acinetobacter baumannii strain TG29392 plasmid pTG29392_2, complete sequence |
| 538 | NZ_CP039933 | Acinetobacter baumannii strain TG29392 plasmid pTG29392_3, complete sequence |
| 539 | NZ_CP039994 | Acinetobacter baumannii strain TG22182 plasmid pTG22182_1, complete sequence |
| 540 | NZ_CP039995 | Acinetobacter baumannii strain TG22182 plasmid pTG22182_2, complete sequence |
| 541 | NZ_CP040048 | Acinetobacter baumannii strain VB1190 plasmid unnamed1, complete sequence    |
| 542 | NZ_CP040049 | Acinetobacter baumannii strain VB1190 plasmid unnamed2, complete sequence    |
| 543 | NZ_CP040051 | Acinetobacter baumannii strain VB16141 plasmid unnamed1, complete sequence   |
| 544 | NZ_CP040052 | Acinetobacter baumannii strain VB16141 plasmid unnamed2, complete sequence   |
| 545 | NZ_CP040081 | Acinetobacter baumannii strain SP304 plasmid unnamed1, complete sequence     |
| 546 | NZ_CP040082 | Acinetobacter baumannii strain SP304 plasmid unnamed2, complete sequence     |
| 547 | NZ_CP040083 | Acinetobacter baumannii strain SP304 plasmid unnamed3, complete sequence     |
| 548 | NZ_CP040085 | Acinetobacter baumannii strain VB33071 plasmid unnamed1, complete sequence   |
| 549 | NZ_CP040086 | Acinetobacter baumannii strain VB33071 plasmid unnamed2, complete sequence   |
| 550 | NZ_CP040088 | Acinetobacter baumannii strain VB35575 plasmid unnamed1, complete sequence   |
| 551 | NZ_CP040260 | Acinetobacter baumannii strain P7774 plasmid unnamed1, complete sequence     |
| 552 | NZ_CP040261 | Acinetobacter baumannii strain P7774 plasmid unnamed2, complete sequence     |
| 553 | NZ_CP040262 | Acinetobacter baumannii strain P7774 plasmid unnamed3, complete sequence     |
| 554 | NZ_CP040426 | Acinetobacter baumannii strain PB364 plasmid pPB364_1, complete sequence     |

|     |             |                                                                                  |
|-----|-------------|----------------------------------------------------------------------------------|
| 555 | NZ_CP040427 | Acinetobacter baumannii strain PB364 plasmid pPB364_2, complete sequence         |
| 556 | NZ_CP040912 | Acinetobacter pittii strain AB17H194 plasmid pAB17H194-1, complete sequence      |
| 557 | NZ_CP040913 | Acinetobacter pittii strain AB17H194 plasmid pAB17H194-2, complete sequence      |
| 558 | NZ_CP041149 | Acinetobacter baumannii strain CUVET-MIC596 plasmid pCUVET596, complete sequence |
| 559 | NZ_CP041225 | Acinetobacter haemolyticus strain AN54 plasmid pAhaeAN54d                        |
| 560 | NZ_CP041226 | Acinetobacter haemolyticus strain AN54 plasmid pAhaeAN54c                        |
| 561 | NZ_CP041227 | Acinetobacter haemolyticus strain AN54 plasmid pUnnamed                          |
| 562 | NZ_CP041228 | Acinetobacter haemolyticus strain AN54 plasmid pAhaemAN54a                       |
| 563 | NZ_CP041229 | Acinetobacter haemolyticus strain AN54 plasmid pAhaeAN54e, complete sequence     |
| 564 | NZ_CP041287 | Acinetobacter indicus strain 94-2 plasmid p94-2-p4, complete sequence            |
| 565 | NZ_CP041288 | Acinetobacter indicus strain 94-2 plasmid p94-2-p2, complete sequence            |
| 566 | NZ_CP041289 | Acinetobacter indicus strain 94-2 plasmid p94-2-p5, complete sequence            |
| 567 | NZ_CP041290 | Acinetobacter indicus strain 94-2 plasmid p94-2-tetX3, complete sequence         |
| 568 | NZ_CP041292 | Acinetobacter indicus strain 94-2 plasmid p94-2-p3, complete sequence            |
| 569 | NZ_CP041293 | Acinetobacter indicus strain 80-1-2 plasmid p80-1-2-p5, complete sequence        |
| 570 | NZ_CP041294 | Acinetobacter indicus strain 80-1-2 plasmid p80-1-2-p3, complete sequence        |
| 571 | NZ_CP041296 | Acinetobacter indicus strain 80-1-2 plasmid p80-1-2-p2, complete sequence        |
| 572 | NZ_CP041297 | Acinetobacter indicus strain 80-1-2 plasmid p80-1-2-tetX3, complete sequence     |
| 573 | NZ_CP041298 | Acinetobacter indicus strain 80-1-2 plasmid p80-1-2-p4, complete sequence        |
| 574 | NZ_CP041366 | Acinetobacter tandoii strain SE63 plasmid p1, complete sequence                  |
| 575 | NZ_CP041367 | Acinetobacter tandoii strain SE63 plasmid p2, complete sequence                  |
| 576 | NZ_CP041588 | Acinetobacter baumannii strain J9 plasmid pJ9-1, complete sequence               |
| 577 | NZ_CP041589 | Acinetobacter baumannii strain J9 plasmid pJ9-2, complete sequence               |
| 578 | NZ_CP041590 | Acinetobacter baumannii strain J9 plasmid pJ9-3, complete sequence               |
| 579 | NZ_CP042365 | Acinetobacter pittii strain C54 plasmid pC54_001, complete sequence              |
| 580 | NZ_CP042366 | Acinetobacter pittii strain C54 plasmid pC54_002                                 |
| 581 | NZ_CP042367 | Acinetobacter pittii strain C54 plasmid pC54_003, complete sequence              |
| 582 | NZ_CP042368 | Acinetobacter pittii strain C54 plasmid pC54_004, complete sequence              |
| 583 | NZ_CP042369 | Acinetobacter pittii strain C54 plasmid pC54_005, complete sequence              |
| 584 | NZ_CP042370 | Acinetobacter pittii strain C54 plasmid pC54_006                                 |
| 585 | NZ_CP042557 | Acinetobacter baumannii strain E47 plasmid pE47_001, complete sequence           |
| 586 | NZ_CP042558 | Acinetobacter baumannii strain E47 plasmid pE47_002, complete sequence           |

|     |             |                                                                                        |
|-----|-------------|----------------------------------------------------------------------------------------|
| 587 | NZ_CP042559 | <i>Acinetobacter baumannii</i> strain E47 plasmid pE47_003, complete sequence          |
| 588 | NZ_CP042560 | <i>Acinetobacter baumannii</i> strain E47 plasmid pE47_004, complete sequence          |
| 589 | NZ_CP042561 | <i>Acinetobacter baumannii</i> strain E47 plasmid pE47_005, complete sequence          |
| 590 | NZ_CP042562 | <i>Acinetobacter baumannii</i> strain E47 plasmid pE47_006, complete sequence          |
| 591 | NZ_CP042563 | <i>Acinetobacter baumannii</i> strain E47 plasmid pE47_007, complete sequence          |
| 592 | NZ_CP042564 | <i>Acinetobacter baumannii</i> strain E47 plasmid pE47_008, complete sequence          |
| 593 | NZ_CP042565 | <i>Acinetobacter baumannii</i> strain E47 plasmid pE47_009, complete sequence          |
| 594 | NZ_CP042842 | <i>Acinetobacter baumannii</i> strain ATCC BAA-1790 plasmid unnamed, complete sequence |
| 595 | NZ_CP042995 | <i>Acinetobacter nosocomialis</i> strain J1A plasmid unnamed1, complete sequence       |
| 596 | NZ_CP042996 | <i>Acinetobacter nosocomialis</i> strain J1A plasmid unnamed2, complete sequence       |
| 597 | NZ_CP043053 | <i>Acinetobacter pittii</i> strain AP43 plasmid pAP43-OXA58-NDM1, complete sequence    |
| 598 | NZ_CP043054 | <i>Acinetobacter pittii</i> strain AP43 plasmid pAP43-2, complete sequence             |
| 599 | NZ_CP043055 | <i>Acinetobacter pittii</i> strain AP43 plasmid pAP43-3, complete sequence             |
| 600 | NZ_CP043308 | <i>Acinetobacter johnsonii</i> strain Acsw19 plasmid pAcsw19-1, complete sequence      |
| 601 | NZ_CP043309 | <i>Acinetobacter johnsonii</i> strain Acsw19 plasmid pAcsw19-2, complete sequence      |
| 602 | NZ_CP043310 | <i>Acinetobacter johnsonii</i> strain Acsw19 plasmid pAcsw19-3, complete sequence      |
| 603 | NZ_CP043954 | <i>Acinetobacter baumannii</i> strain K09-14 plasmid pK09-14, complete sequence        |
| 604 | NZ_CP044019 | <i>Acinetobacter indicus</i> strain HY20 plasmid pAI01, complete sequence              |
| 605 | NZ_CP044020 | <i>Acinetobacter indicus</i> strain HY20 plasmid pAI02, complete sequence              |
| 606 | NZ_CP044357 | <i>Acinetobacter baumannii</i> strain CAM180-1 plasmid pCAM180A, complete sequence     |
| 607 | NZ_CP044358 | <i>Acinetobacter baumannii</i> strain CAM180-1 plasmid pCAM180B, complete sequence     |
| 608 | NZ_CP044446 | <i>Acinetobacter indicus</i> strain CMG3-2 plasmid pCMG3-2-1, complete sequence        |
| 609 | NZ_CP044447 | <i>Acinetobacter indicus</i> strain CMG3-2 plasmid pCMG3-2-2, complete sequence        |
| 610 | NZ_CP044448 | <i>Acinetobacter indicus</i> strain CMG3-2 plasmid pCMG3-2-3, complete sequence        |
| 611 | NZ_CP044449 | <i>Acinetobacter indicus</i> strain CMG3-2 plasmid pCMG3-2-4, complete sequence        |
| 612 | NZ_CP044451 | <i>Acinetobacter indicus</i> strain MMS9-2 plasmid pMMS9-2-1, complete sequence        |
| 613 | NZ_CP044452 | <i>Acinetobacter indicus</i> strain MMS9-2 plasmid pMMS9-2-2, complete sequence        |
| 614 | NZ_CP044453 | <i>Acinetobacter indicus</i> strain MMS9-2 plasmid pMMS9-2-3, complete sequence        |
| 615 | NZ_CP044454 | <i>Acinetobacter indicus</i> strain MMS9-2 plasmid pMMS9-2-4, complete sequence        |
| 616 | NZ_CP044456 | <i>Acinetobacter indicus</i> strain B18 plasmid pB18-1, complete sequence              |
| 617 | NZ_CP044457 | <i>Acinetobacter indicus</i> strain B18 plasmid pB18-2, complete sequence              |
| 618 | NZ_CP044458 | <i>Acinetobacter indicus</i> strain B18 plasmid pB18-3, complete sequence              |

|     |             |                                                                                |
|-----|-------------|--------------------------------------------------------------------------------|
| 619 | NZ_CP044459 | Acinetobacter indicus strain B18 plasmid pB18-4, complete sequence             |
| 620 | NZ_CP044460 | Acinetobacter indicus strain B18 plasmid pB18-5, complete sequence             |
| 621 | NZ_CP044461 | Acinetobacter indicus strain B18 plasmid pB18-6, complete sequence             |
| 622 | NZ_CP044462 | Acinetobacter indicus strain B18 plasmid pB18-7, complete sequence             |
| 623 | NZ_CP044464 | Acinetobacter schindleri strain HZE23-1 plasmid pHZE23-1-1, complete sequence  |
| 624 | NZ_CP044465 | Acinetobacter schindleri strain HZE23-1 plasmid pHZE23-1-2, complete sequence  |
| 625 | NZ_CP044466 | Acinetobacter schindleri strain HZE23-1 plasmid pHZE23-1-3, complete sequence  |
| 626 | NZ_CP044467 | Acinetobacter schindleri strain HZE23-1 plasmid pHZE23-1-4, complete sequence  |
| 627 | NZ_CP044468 | Acinetobacter schindleri strain HZE23-1 plasmid pHZE23-1-5, complete sequence  |
| 628 | NZ_CP044469 | Acinetobacter schindleri strain HZE23-1 plasmid pHZE23-1-6, complete sequence  |
| 629 | NZ_CP044470 | Acinetobacter schindleri strain HZE23-1 plasmid pHZE23-1-7, complete sequence  |
| 630 | NZ_CP044471 | Acinetobacter schindleri strain HZE23-1 plasmid pHZE23-1-8, complete sequence  |
| 631 | NZ_CP044472 | Acinetobacter schindleri strain HZE23-1 plasmid pHZE23-1-9, complete sequence  |
| 632 | NZ_CP044473 | Acinetobacter schindleri strain HZE23-1 plasmid pHZE23-1-10, complete sequence |
| 633 | NZ_CP044475 | Acinetobacter schindleri strain HZE33-1 plasmid pHZE33-1-1, complete sequence  |
| 634 | NZ_CP044476 | Acinetobacter schindleri strain HZE33-1 plasmid pHZE33-1-2, complete sequence  |
| 635 | NZ_CP044477 | Acinetobacter schindleri strain HZE33-1 plasmid pHZE33-1-3, complete sequence  |
| 636 | NZ_CP044478 | Acinetobacter schindleri strain HZE33-1 plasmid pHZE33-1-4, complete sequence  |
| 637 | NZ_CP044479 | Acinetobacter schindleri strain HZE33-1 plasmid pHZE33-1-5, complete sequence  |
| 638 | NZ_CP044480 | Acinetobacter schindleri strain HZE33-1 plasmid pHZE33-1-6, complete sequence  |
| 639 | NZ_CP044481 | Acinetobacter schindleri strain HZE33-1 plasmid pHZE33-1-7, complete sequence  |
| 640 | NZ_CP044482 | Acinetobacter schindleri strain HZE33-1 plasmid pHZE33-1-8, complete sequence  |
| 641 | NZ_CP044484 | Acinetobacter schindleri strain HZE30-1 plasmid pHZE30-1-1, complete sequence  |
| 642 | NZ_CP044485 | Acinetobacter schindleri strain HZE30-1 plasmid pHZE30-1-2, complete sequence  |
| 643 | NZ_CP044486 | Acinetobacter schindleri strain HZE30-1 plasmid pHZE30-1-3, complete sequence  |
| 644 | NZ_CP044487 | Acinetobacter schindleri strain HZE30-1 plasmid pHZE30-1-4, complete sequence  |
| 645 | NZ_CP044488 | Acinetobacter schindleri strain HZE30-1 plasmid pHZE30-1-5, complete sequence  |
| 646 | NZ_CP044489 | Acinetobacter schindleri strain HZE30-1 plasmid pHZE30-1-6, complete sequence  |
| 647 | NZ_CP044490 | Acinetobacter schindleri strain HZE30-1 plasmid pHZE30-1-7, complete sequence  |
| 648 | NZ_CP044491 | Acinetobacter schindleri strain HZE30-1 plasmid pHZE30-1-8, complete sequence  |
| 649 | NZ_CP044518 | Acinetobacter baumannii strain 31FS3-2 plasmid p31FS3-2-1, complete sequence   |
| 650 | NZ_CP044520 | Acinetobacter baumannii strain 29FS20 plasmid p29FS20-1, complete sequence     |

|     |             |                                                                                  |
|-----|-------------|----------------------------------------------------------------------------------|
| 651 | NZ_CP044521 | Acinetobacter baumannii strain 29FS20 plasmid p29FS20-2, complete sequence       |
| 652 | NZ_CP045108 | Acinetobacter baumannii strain ATCC 19606 plasmid p1ATCC19606, complete sequence |
| 653 | NZ_CP045109 | Acinetobacter baumannii strain ATCC 19606 plasmid p2ATCC19606, complete sequence |
| 654 | NZ_CP045123 | Acinetobacter indicus strain XG03 plasmid pXG-13k, complete sequence             |
| 655 | NZ_CP045124 | Acinetobacter indicus strain XG03 plasmid pXG-160kb, complete sequence           |
| 656 | NZ_CP045125 | Acinetobacter indicus strain XG03 plasmid pXG-4k, complete sequence              |
| 657 | NZ_CP045126 | Acinetobacter indicus strain XG03 plasmid pXG-5k, complete sequence              |
| 658 | NZ_CP045128 | Acinetobacter indicus strain XG03 plasmid pXG03-X3, complete sequence            |
| 659 | NZ_CP045130 | Acinetobacter indicus strain TQ04 plasmid p4TQ-NDM, complete sequence            |
| 660 | NZ_CP045132 | Acinetobacter indicus strain TQ18 plasmid p18TQ-X3, complete sequence            |
| 661 | NZ_CP045133 | Acinetobacter indicus strain TQ18 plasmid p18TQ-NDM, complete sequence           |
| 662 | NZ_CP045134 | Acinetobacter indicus strain TQ18 plasmid p18TQ-13k, complete sequence           |
| 663 | NZ_CP045136 | Acinetobacter indicus strain XG01 plasmid pXG01-X3, complete sequence            |
| 664 | NZ_CP045196 | Acinetobacter indicus strain TQ23 plasmid p23TQ-37k, complete sequence           |
| 665 | NZ_CP045197 | Acinetobacter indicus strain TQ23 plasmid p23TQ-NDM, complete sequence           |
| 666 | NZ_CP045561 | Acinetobacter nosocomialis strain AC1530 plasmid pAC1530, complete sequence      |
| 667 | NZ_CP046043 | Acinetobacter towneri strain 19110F47 plasmid p19110F47-1, complete sequence     |
| 668 | NZ_CP046044 | Acinetobacter towneri strain 19110F47 plasmid p19110F47-2, complete sequence     |
| 669 | NZ_CP046295 | Acinetobacter lwoffii strain FDAARGOS_552 plasmid unnamed1, complete sequence    |
| 670 | NZ_CP046297 | Acinetobacter lwoffii strain FDAARGOS_552 plasmid unnamed2, complete sequence    |
| 671 | NZ_CP046298 | Acinetobacter lwoffii strain FDAARGOS_552 plasmid unnamed3, complete sequence    |
| 672 | NZ_CP046299 | Acinetobacter lwoffii strain FDAARGOS_552 plasmid unnamed4, complete sequence    |
| 673 | NZ_CP046537 | Acinetobacter baumannii strain XL380 plasmid unnamed, complete sequence          |
| 674 | NZ_CP046655 | Acinetobacter baumannii strain ATCC 19606 plasmid pMAC, complete sequence        |
| 675 | NZ_CP046899 | Acinetobacter baumannii strain A1429 plasmid pA1429c, complete sequence          |
| 676 | NZ_CP046900 | Acinetobacter baumannii strain A1429 plasmid pA1429b, complete sequence          |
| 677 | NZ_CP046901 | Acinetobacter baumannii strain A1429 plasmid pA1429a, complete sequence          |
| 678 | NZ_CP047974 | Acinetobacter baumannii strain DETAB-P2 plasmid pDETAB1, complete sequence       |
| 679 | NZ_CP047975 | Acinetobacter baumannii strain DETAB-P2 plasmid pDETAB2, complete sequence       |
| 680 | NZ_CP047976 | Acinetobacter baumannii strain DETAB-P2 plasmid pDETAB3, complete sequence       |
| 681 | NZ_CP048015 | Acinetobacter towneri strain 205 plasmid pAT205, complete sequence               |
| 682 | NZ_CP048016 | Acinetobacter towneri strain 205 plasmid pAT205-1                                |

|     |             |                                                                                   |
|-----|-------------|-----------------------------------------------------------------------------------|
| 683 | NZ_CP048017 | Acinetobacter towneri strain 205 plasmid pAT205-2                                 |
| 684 | NZ_CP048018 | Acinetobacter towneri strain 205 plasmid pAT205-3                                 |
| 685 | NZ_CP048655 | Acinetobacter indicus strain C15_T plasmid pC15-1, complete sequence              |
| 686 | NZ_CP048656 | Acinetobacter indicus strain C15_T plasmid pC15-2, complete sequence              |
| 687 | NZ_CP048657 | Acinetobacter indicus strain C15_T plasmid pC15-3, complete sequence              |
| 688 | NZ_CP048658 | Acinetobacter indicus strain C15_T plasmid pC15-4                                 |
| 689 | NZ_CP048660 | Acinetobacter piscicola strain YH12207_T plasmid pYH12207-1, complete sequence    |
| 690 | NZ_CP048661 | Acinetobacter piscicola strain YH12207_T plasmid pYH12207-2, complete sequence    |
| 691 | NZ_CP048662 | Acinetobacter piscicola strain YH12207_T plasmid pYH12207-3, complete sequence    |
| 692 | NZ_CP048663 | Acinetobacter piscicola strain YH12207_T plasmid pYH12207-4, complete sequence    |
| 693 | NZ_CP048664 | Acinetobacter piscicola strain YH12207_T plasmid pYH12207-5, complete sequence    |
| 694 | NZ_CP048665 | Acinetobacter piscicola strain YH12207_T plasmid pYH12207-6, complete sequence    |
| 695 | NZ_CP048666 | Acinetobacter piscicola strain YH12207_T plasmid pYH12207-7, complete sequence    |
| 696 | NZ_CP048667 | Acinetobacter piscicola strain YH12207_T plasmid pYH12207-8, complete sequence    |
| 697 | NZ_CP048668 | Acinetobacter piscicola strain YH12207_T plasmid pYH12207-9, complete sequence    |
| 698 | NZ_CP048669 | Acinetobacter piscicola strain YH12207_T plasmid pYH12207-10, complete sequence   |
| 699 | NZ_CP048671 | Acinetobacter sp. YH12138 strain YH12138_T plasmid pYH12138-1, complete sequence  |
| 700 | NZ_CP048672 | Acinetobacter sp. YH12138 strain YH12138_T plasmid pYH12138-2                     |
| 701 | NZ_CP048673 | Acinetobacter sp. YH12138 strain YH12138_T plasmid pYH12138-3, complete sequence  |
| 702 | NZ_CP048674 | Acinetobacter sp. YH12138 strain YH12138_T plasmid pYH12138-4, complete sequence  |
| 703 | NZ_CP048675 | Acinetobacter sp. YH12138 strain YH12138_T plasmid pYH12138-5, complete sequence  |
| 704 | NZ_CP048676 | Acinetobacter sp. YH12138 strain YH12138_T plasmid pYH12138-6, complete sequence  |
| 705 | NZ_CP048677 | Acinetobacter sp. YH12138 strain YH12138_T plasmid pYH12138-7, complete sequence  |
| 706 | NZ_CP048678 | Acinetobacter sp. YH12138 strain YH12138_T plasmid pYH12138-8, complete sequence  |
| 707 | NZ_CP048679 | Acinetobacter sp. YH12138 strain YH12138_T plasmid pYH12138-9, complete sequence  |
| 708 | NZ_CP048680 | Acinetobacter sp. YH12138 strain YH12138_T plasmid pYH12138-10, complete sequence |
| 709 | NZ_CP048682 | Acinetobacter indicus strain Q186-3_T plasmid pQ186-3-1, complete sequence        |
| 710 | NZ_CP048683 | Acinetobacter indicus strain Q186-3_T plasmid pQ186-3-2, complete sequence        |
| 711 | NZ_CP048684 | Acinetobacter indicus strain Q186-3_T plasmid pQ186-3-3, complete sequence        |
| 712 | NZ_CP048828 | Acinetobacter baumannii strain ABF9692 plasmid pABF9692, complete sequence        |
| 713 | NZ_CP049364 | Acinetobacter baumannii strain ATCC 17978 plasmid pAB1, complete sequence         |
| 714 | NZ_CP049365 | Acinetobacter baumannii strain ATCC 17978 plasmid pAB2, complete sequence         |

|     |             |                                                                                 |
|-----|-------------|---------------------------------------------------------------------------------|
| 715 | NZ_CP049807 | Acinetobacter pittii strain A1254 plasmid pA1254_1, complete sequence           |
| 716 | NZ_CP049808 | Acinetobacter pittii strain A1254 plasmid pA1254_2, complete sequence           |
| 717 | NZ_CP049809 | Acinetobacter pittii strain A1254 plasmid pA1254_3, complete sequence           |
| 718 | NZ_CP049810 | Acinetobacter pittii strain A1254 plasmid pA1254_4, complete sequence           |
| 719 | NZ_CP049917 | Acinetobacter lanii strain 185 plasmid unnamed1                                 |
| 720 | NZ_CP050386 | Acinetobacter baumannii strain VB82 plasmid pVB82_1, complete sequence          |
| 721 | NZ_CP050387 | Acinetobacter baumannii strain VB82 plasmid pVB82_2, complete sequence          |
| 722 | NZ_CP050389 | Acinetobacter baumannii strain VB473 plasmid pVB473_1, complete sequence        |
| 723 | NZ_CP050391 | Acinetobacter baumannii strain VB723 plasmid pVB723_1, complete sequence        |
| 724 | NZ_CP050392 | Acinetobacter baumannii strain VB11737 plasmid pVB11737_1, complete sequence    |
| 725 | NZ_CP050393 | Acinetobacter baumannii strain VB11737 plasmid pVB11737_2, complete sequence    |
| 726 | NZ_CP050394 | Acinetobacter baumannii strain VB11737 plasmid pVB11737_3, complete sequence    |
| 727 | NZ_CP050395 | Acinetobacter baumannii strain VB11737 plasmid pVB11737_4, complete sequence    |
| 728 | NZ_CP050396 | Acinetobacter baumannii strain VB11737 plasmid pVB11737_5, complete sequence    |
| 729 | NZ_CP050397 | Acinetobacter baumannii strain VB11737 plasmid pVB11737_6, complete sequence    |
| 730 | NZ_CP050398 | Acinetobacter baumannii strain VB11737 plasmid pVB11737_7, complete sequence    |
| 731 | NZ_CP050399 | Acinetobacter baumannii strain VB11737 plasmid pVB11737_8, complete sequence    |
| 732 | NZ_CP050402 | Acinetobacter baumannii strain VB2181 plasmid pVB2181, complete sequence        |
| 733 | NZ_CP050404 | Acinetobacter baumannii strain VB2486 plasmid pVB2486_1, complete sequence      |
| 734 | NZ_CP050405 | Acinetobacter baumannii strain VB2486 plasmid pVB2486_2, complete sequence      |
| 735 | NZ_CP050406 | Acinetobacter baumannii strain VB2486 plasmid pVB2486_3, complete sequence      |
| 736 | NZ_CP050407 | Acinetobacter baumannii strain VB2486 plasmid pVB2486_4, complete sequence      |
| 737 | NZ_CP050408 | Acinetobacter baumannii strain VB2486 plasmid pVB2486_5, complete sequence      |
| 738 | NZ_CP050409 | Acinetobacter baumannii strain VB2486 plasmid pVB2486_6, complete sequence      |
| 739 | NZ_CP050411 | Acinetobacter baumannii strain PM1912235 plasmid pPM192235_1, complete sequence |
| 740 | NZ_CP050413 | Acinetobacter baumannii strain PM192696 plasmid pPM192696_1, complete sequence  |
| 741 | NZ_CP050414 | Acinetobacter baumannii strain PM192696 plasmid pPM192696_2, complete sequence  |
| 742 | NZ_CP050416 | Acinetobacter baumannii strain PM193665 plasmid pPM193665_1, complete sequence  |
| 743 | NZ_CP050417 | Acinetobacter baumannii strain PM193665 plasmid pPM193665_2, complete sequence  |
| 744 | NZ_CP050418 | Acinetobacter baumannii strain PM193665 plasmid pPM193665_3, complete sequence  |
| 745 | NZ_CP050419 | Acinetobacter baumannii strain PM193665 plasmid pPM193665_4, complete sequence  |
| 746 | NZ_CP050420 | Acinetobacter baumannii strain PM193665 plasmid pPM193665_5, complete sequence  |

|     |             |                                                                                |
|-----|-------------|--------------------------------------------------------------------------------|
| 747 | NZ_CP050422 | Acinetobacter baumannii strain VB2200 plasmid pVB2200_1, complete sequence     |
| 748 | NZ_CP050423 | Acinetobacter baumannii strain VB2200 plasmid pVB2200_2, complete sequence     |
| 749 | NZ_CP050426 | Acinetobacter baumannii strain PM194188 plasmid pPM194122_1, complete sequence |
| 750 | NZ_CP050427 | Acinetobacter baumannii strain PM194188 plasmid pPM194122_2, complete sequence |
| 751 | NZ_CP050428 | Acinetobacter baumannii strain PM194188 plasmid pPM194122_3, complete sequence |
| 752 | NZ_CP050429 | Acinetobacter baumannii strain PM194188 plasmid pPM194122_4, complete sequence |
| 753 | NZ_CP050430 | Acinetobacter baumannii strain PM194188 plasmid pPM194122_5, complete sequence |
| 754 | NZ_CP050431 | Acinetobacter baumannii strain PM194188 plasmid pPM194122_6, complete sequence |
| 755 | NZ_CP050433 | Acinetobacter baumannii strain PM194229 plasmid pPM194229_1, complete sequence |
| 756 | NZ_CP050434 | Acinetobacter baumannii strain PM194229 plasmid pPM194229_2, complete sequence |
| 757 | NZ_CP050435 | Acinetobacter baumannii strain PM194229 plasmid pPM194229_3, complete sequence |
| 758 | NZ_CP050524 | Acinetobacter baumannii strain VB7036 plasmid pVB7036_1, complete sequence     |
| 759 | NZ_CP050525 | Acinetobacter baumannii strain VB7036 plasmid pVB7036_2, complete sequence     |
| 760 | NZ_CP050527 | Acinetobacter baumannii strain VB2139 plasmid pVB2139_1, complete sequence     |
| 761 | NZ_CP050528 | Acinetobacter baumannii strain VB2139 plasmid pVB2139_2, complete sequence     |
| 762 | NZ_CP050529 | Acinetobacter baumannii strain VB2139 plasmid pVB2139_3, complete sequence     |
| 763 | NZ_CP050905 | Acinetobacter baumannii strain DT-Ab057 plasmid unnamed1, complete sequence    |
| 764 | NZ_CP050906 | Acinetobacter baumannii strain DT-Ab057 plasmid unnamed2, complete sequence    |
| 765 | NZ_CP050908 | Acinetobacter baumannii strain DT-Ab022 plasmid unnamed1, complete sequence    |
| 766 | NZ_CP050909 | Acinetobacter baumannii strain DT-Ab022 plasmid unnamed2, complete sequence    |
| 767 | NZ_CP050910 | Acinetobacter baumannii strain DT-Ab022 plasmid unnamed3, complete sequence    |
| 768 | NZ_CP050912 | Acinetobacter baumannii strain DT-Ab020 plasmid unnamed1, complete sequence    |
| 769 | NZ_CP050913 | Acinetobacter baumannii strain DT-Ab020 plasmid unnamed2, complete sequence    |
| 770 | NZ_CP050915 | Acinetobacter baumannii strain DT-Ab007 plasmid unnamed1, complete sequence    |
| 771 | NZ_CP050917 | Acinetobacter baumannii strain DT-Ab003 plasmid unnamed1, complete sequence    |
| 772 | NZ_CP050918 | Acinetobacter baumannii strain DT-Ab003 plasmid unnamed2, complete sequence    |
| 773 | NZ_CP051209 | Acinetobacter sp. NEB149 plasmid pMsp179, complete sequence                    |
| 774 | NZ_CP051210 | Acinetobacter sp. NEB149 plasmid pMsp65, complete sequence                     |
| 775 | NZ_CP051211 | Acinetobacter sp. NEB149 plasmid pMsp22, complete sequence                     |
| 776 | NZ_CP051212 | Acinetobacter sp. NEB149 plasmid pMsp11, complete sequence                     |
| 777 | NZ_CP051475 | Acinetobacter baumannii strain VB2107 plasmid pVB2107_1, complete sequence     |
| 778 | NZ_CP051476 | Acinetobacter baumannii strain VB2107 plasmid pVB2107_2, complete sequence     |



|     |             |                                                                                    |
|-----|-------------|------------------------------------------------------------------------------------|
| 779 | NZ_CP051477 | Acinetobacter baumannii strain VB2107 plasmid pVB2107_3, complete sequence         |
| 780 | NZ_CP051863 | Acinetobacter baumannii strain Ab-C102 plasmid pAb-C102_1, complete sequence       |
| 781 | NZ_CP051864 | Acinetobacter baumannii strain Ab-C102 plasmid pAb-C102_2, complete sequence       |
| 782 | NZ_CP051865 | Acinetobacter baumannii strain Ab-C102 plasmid pAb-C102_3, complete sequence       |
| 783 | NZ_CP051867 | Acinetobacter baumannii strain Ab-C63 plasmid pAb-C63_1, complete sequence         |
| 784 | NZ_CP051868 | Acinetobacter baumannii strain Ab-C63 plasmid pAb-C63_2, complete sequence         |
| 785 | NZ_CP051870 | Acinetobacter baumannii strain Ab-D10a-a plasmid pAb-D10a-a_1, complete sequence   |
| 786 | NZ_CP051871 | Acinetobacter baumannii strain Ab-D10a-a plasmid pAb-D10a-a_2, complete sequence   |
| 787 | NZ_CP051872 | Acinetobacter baumannii strain Ab-D10a-a plasmid pAb-D10a-a_3, complete sequence   |
| 788 | NZ_CP051873 | Acinetobacter baumannii strain Ab-D10a-a plasmid pAb-D10a-a_4, complete sequence   |
| 789 | NZ_CP051874 | Acinetobacter baumannii strain Ab-D10a-a plasmid pAb-D10a-a_5, complete sequence   |
| 790 | NZ_CP051876 | Acinetobacter baumannii strain Ab-B004d-c plasmid pAb-B004d-c_1, complete sequence |
| 791 | NZ_CP051877 | Acinetobacter baumannii strain Ab-B004d-c plasmid pAb-B004d-c_2, complete sequence |
| 792 | NZ_CP051878 | Acinetobacter baumannii strain Ab-B004d-c plasmid pAb-B004d-c_3, complete sequence |
| 793 | NZ_CP051879 | Acinetobacter baumannii strain Ab-B004d-c plasmid pAb-B004d-c_4, complete sequence |
| 794 | NZ_CP053099 | Acinetobacter baumannii ATCC 17978 plasmid unnamed1, complete sequence             |
| 795 | NZ_CP053100 | Acinetobacter baumannii ATCC 17978 plasmid unnamed2, complete sequence             |
| 796 | NZ_CP053216 | Acinetobacter baumannii strain DT0544C plasmid unnamed1, complete sequence         |
| 797 | NZ_CP053217 | Acinetobacter baumannii strain DT0544C plasmid unnamed2, complete sequence         |
| 798 | NZ_CP053219 | Acinetobacter baumannii strain DT01139C plasmid unnamed1, complete sequence        |
| 799 | NZ_CP053220 | Acinetobacter baumannii strain DT01139C plasmid unnamed2, complete sequence        |
| 800 | NZ_CP053221 | Acinetobacter baumannii strain DT01139C plasmid unnamed3, complete sequence        |
| 801 | NZ_CP054138 | Acinetobacter pittii strain JXA13 plasmid pHNJXA13-1, complete sequence            |
| 802 | NZ_CP054804 | Acinetobacter lwoffii strain FDAARGOS_557 plasmid unnamed3                         |
| 803 | NZ_CP054805 | Acinetobacter lwoffii strain FDAARGOS_557 plasmid unnamed2                         |
| 804 | NZ_CP054806 | Acinetobacter lwoffii strain FDAARGOS_557 plasmid unnamed1, complete sequence      |
| 805 | NZ_CP054821 | Acinetobacter lwoffii strain FDAARGOS_551 plasmid unnamed1, complete sequence      |
| 806 | NZ_CP054823 | Acinetobacter lwoffii strain FDAARGOS_551 plasmid unnamed3                         |
| 807 | NZ_CP054824 | Acinetobacter lwoffii strain FDAARGOS_551 plasmid unnamed2, complete sequence      |
| 808 | NZ_CP054825 | Acinetobacter lwoffii strain FDAARGOS_551 plasmid unnamed4                         |
| 809 | NZ_CP054826 | Acinetobacter lwoffii strain FDAARGOS_551 plasmid unnamed5                         |
| 810 | NZ_CP054904 | Acinetobacter sp. FDAARGOS_724 plasmid unnamed1, complete sequence                 |

|     |             |                                                                                      |
|-----|-------------|--------------------------------------------------------------------------------------|
| 811 | NZ_CP054905 | Acinetobacter sp. FDAARGOS_724 plasmid unnamed4                                      |
| 812 | NZ_CP054906 | Acinetobacter sp. FDAARGOS_724 plasmid unnamed3                                      |
| 813 | NZ_CP054907 | Acinetobacter sp. FDAARGOS_724 plasmid unnamed2, complete sequence                   |
| 814 | NZ_CP055278 | Acinetobacter sp. NEB 394 plasmid pBspH10, complete sequence                         |
| 815 | NZ_CP055279 | Acinetobacter sp. NEB 394 plasmid pBspH11, complete sequence                         |
| 816 | NZ_CP055280 | Acinetobacter sp. NEB 394 plasmid pBspH12, complete sequence                         |
| 817 | NZ_CP055281 | Acinetobacter sp. NEB 394 plasmid pBspH13, complete sequence                         |
| 818 | NZ_CP055282 | Acinetobacter sp. NEB 394 plasmid pBspH14, complete sequence                         |
| 819 | NZ_CP055283 | Acinetobacter sp. NEB 394 plasmid pBspH1, complete sequence                          |
| 820 | NZ_CP055284 | Acinetobacter sp. NEB 394 plasmid pBspH2, complete sequence                          |
| 821 | NZ_CP055285 | Acinetobacter sp. NEB 394 plasmid pBspH3, complete sequence                          |
| 822 | NZ_CP055286 | Acinetobacter sp. NEB 394 plasmid pBspH4, complete sequence                          |
| 823 | NZ_CP055287 | Acinetobacter sp. NEB 394 plasmid pBspH5, complete sequence                          |
| 824 | NZ_CP055288 | Acinetobacter sp. NEB 394 plasmid pBspH6, complete sequence                          |
| 825 | NZ_CP055289 | Acinetobacter sp. NEB 394 plasmid pBspH7, complete sequence                          |
| 826 | NZ_CP055290 | Acinetobacter sp. NEB 394 plasmid pBspH8, complete sequence                          |
| 827 | NZ_CP055291 | Acinetobacter sp. NEB 394 plasmid pBspH9, complete sequence                          |
| 828 | NZ_CP056785 | Acinetobacter baumannii strain TP1 plasmid pTP1A, complete sequence                  |
| 829 | NZ_CP059042 | Acinetobacter baumannii strain ATCC 17978 plasmid unnamed, complete sequence         |
| 830 | NZ_CP059301 | Acinetobacter baumannii strain AC1633 plasmid pAC1633-1, complete sequence           |
| 831 | NZ_CP059302 | Acinetobacter baumannii strain AC1633 plasmid pAC1633-4, complete sequence           |
| 832 | NZ_CP059303 | Acinetobacter baumannii strain AC1633 plasmid pAC1633-2, complete sequence           |
| 833 | NZ_CP059304 | Acinetobacter baumannii strain AC1633 plasmid pAC1633-3, complete sequence           |
| 834 | NZ_CP059387 | Acinetobacter baumannii strain 36-1512 plasmid p1.36-1512, complete sequence         |
| 835 | NZ_CP059388 | Acinetobacter baumannii strain 36-1512 plasmid p2.36-1512, complete sequence         |
| 836 | NZ_CP059389 | Acinetobacter baumannii strain 36-1512 plasmid p3.36-1512, complete sequence         |
| 837 | NZ_CP059390 | Acinetobacter baumannii strain 36-1512 plasmid p4.36-1512, complete sequence         |
| 838 | NZ_CP059478 | Acinetobacter baumannii strain 17-84 plasmid p17-84_OXA, complete sequence           |
| 839 | NZ_CP059559 | Acinetobacter junii strain YR7 plasmid pNDM-YR7, complete sequence                   |
| 840 | NZ_CP059685 | Acinetobacter radioresistens strain FDAARGOS_731 plasmid unnamed1, complete sequence |
| 841 | NZ_CP059686 | Acinetobacter radioresistens strain FDAARGOS_731 plasmid unnamed2, complete sequence |

|     |             |                                                                                          |
|-----|-------------|------------------------------------------------------------------------------------------|
| 842 | NZ_CP059687 | Acinetobacter radioresistens strain FDAARGOS_731 plasmid unnamed5                        |
| 843 | NZ_CP059688 | Acinetobacter radioresistens strain FDAARGOS_731 plasmid unnamed3, complete sequence     |
| 844 | NZ_CP059689 | Acinetobacter radioresistens strain FDAARGOS_731 plasmid unnamed4, complete sequence     |
| 845 | NZ_CP059730 | Acinetobacter baumannii strain AbCTX13 plasmid pAbCTX13_7kb, complete sequence           |
| 846 | NZ_CP059731 | Acinetobacter baumannii strain AbCTX13 plasmid pAbCTX13_17kb, complete sequence          |
| 847 | NZ_CP060012 | Acinetobacter baumannii strain TP2 plasmid pTP2A, complete sequence                      |
| 848 | NZ_CP060014 | Acinetobacter baumannii strain TP3 plasmid pTP3A, complete sequence                      |
| 849 | NZ_CP060812 | Acinetobacter variabilis strain XM9F202-2 plasmid pXM9F202-2-186k, complete sequence     |
| 850 | NZ_CP060813 | Acinetobacter variabilis strain XM9F202-2 plasmid pXM9F202-2-tetX-90k, complete sequence |
| 851 | NZ_CP060814 | Acinetobacter variabilis strain XM9F202-2 plasmid pXM9F202-2-17k, complete sequence      |
| 852 | NZ_CP060815 | Acinetobacter variabilis strain XM9F202-2 plasmid pXM9F202-2-13k, complete sequence      |
| 853 | NZ_CP060816 | Acinetobacter variabilis strain XM9F202-2 plasmid pXM9F202-2-2k, complete sequence       |
| 854 | NZ_CP061515 | Acinetobacter baumannii strain CFSAN093710 plasmid pCFSAN093710_1, complete sequence     |
| 855 | NZ_CP061516 | Acinetobacter baumannii strain CFSAN093710 plasmid pCFSAN093710_2, complete sequence     |
| 856 | NZ_CP061518 | Acinetobacter baumannii strain CFSAN093709 plasmid pCFSAN093709, complete sequence       |
| 857 | NZ_CP061520 | Acinetobacter baumannii strain CFSAN093708 plasmid pCFSAN093708, complete sequence       |
| 858 | NZ_CP061522 | Acinetobacter baumannii strain CFSAN093707 plasmid pCFSAN093707, complete sequence       |
| 859 | NZ_CP061524 | Acinetobacter baumannii strain CFSAN093706 plasmid pCFSAN093706, complete sequence       |
| 860 | NZ_CP061526 | Acinetobacter baumannii strain CFSAN093705 plasmid pCFSAN093705, complete sequence       |
| 861 | NZ_CP061562 | Acinetobacter seifertii strain AS73 plasmid pAS73-1, complete sequence                   |
| 862 | NZ_CP061563 | Acinetobacter seifertii strain AS73 plasmid pAS73-2, complete sequence                   |
| 863 | NZ_CP061564 | Acinetobacter seifertii strain AS73 plasmid pAS73-3, complete sequence                   |
| 864 | NZ_CP061579 | Acinetobacter seifertii strain AS63 plasmid pAS63-1, complete sequence                   |
| 865 | NZ_CP061580 | Acinetobacter seifertii strain AS63 plasmid pAS63-2, complete sequence                   |
| 866 | NZ_CP061581 | Acinetobacter seifertii strain AS63 plasmid pAS63-3, complete sequence                   |
| 867 | NZ_CP061583 | Acinetobacter seifertii strain AS62 plasmid pAS62-1, complete sequence                   |
| 868 | NZ_CP061584 | Acinetobacter seifertii strain AS62 plasmid pAS62-2, complete sequence                   |
| 869 | NZ_CP061585 | Acinetobacter seifertii strain AS62 plasmid pAS62-3, complete sequence                   |
| 870 | NZ_CP061586 | Acinetobacter seifertii strain AS62 plasmid pAS62-4, complete sequence                   |

|     |             |                                                                        |
|-----|-------------|------------------------------------------------------------------------|
| 871 | NZ_CP061587 | Acinetobacter seifertii strain AS62 plasmid pAS62-5, complete sequence |
| 872 | NZ_CP061588 | Acinetobacter seifertii strain AS62 plasmid pAS62-6, complete sequence |
| 873 | NZ_CP061593 | Acinetobacter seifertii strain AS60 plasmid pAS60-1, complete sequence |
| 874 | NZ_CP061594 | Acinetobacter seifertii strain AS60 plasmid pAS60-2, complete sequence |
| 875 | NZ_CP061595 | Acinetobacter seifertii strain AS60 plasmid pAS60-3, complete sequence |
| 876 | NZ_CP061597 | Acinetobacter seifertii strain AS59 plasmid pAS59-1, complete sequence |
| 877 | NZ_CP061604 | Acinetobacter seifertii strain AS53 plasmid pAS53-1, complete sequence |
| 878 | NZ_CP061605 | Acinetobacter seifertii strain AS53 plasmid pAS53-2, complete sequence |
| 879 | NZ_CP061606 | Acinetobacter seifertii strain AS53 plasmid pAS53-3, complete sequence |
| 880 | NZ_CP061607 | Acinetobacter seifertii strain AS53 plasmid pAS53-4, complete sequence |
| 881 | NZ_CP061608 | Acinetobacter seifertii strain AS53 plasmid pAS53-5, complete sequence |
| 882 | NZ_CP061614 | Acinetobacter seifertii strain AS51 plasmid pAS51-1, complete sequence |
| 883 | NZ_CP061615 | Acinetobacter seifertii strain AS51 plasmid pAS51-2, complete sequence |
| 884 | NZ_CP061616 | Acinetobacter seifertii strain AS51 plasmid pAS51-3, complete sequence |
| 885 | NZ_CP061617 | Acinetobacter seifertii strain AS51 plasmid pAS51-4, complete sequence |
| 886 | NZ_CP061618 | Acinetobacter seifertii strain AS51 plasmid pAS51-5, complete sequence |
| 887 | NZ_CP061619 | Acinetobacter seifertii strain AS51 plasmid pAS51-6, complete sequence |
| 888 | NZ_CP061621 | Acinetobacter seifertii strain AS49 plasmid pAS49-1, complete sequence |
| 889 | NZ_CP061622 | Acinetobacter seifertii strain AS49 plasmid pAS49-2, complete sequence |
| 890 | NZ_CP061623 | Acinetobacter seifertii strain AS49 plasmid pAS49-3, complete sequence |
| 891 | NZ_CP061624 | Acinetobacter seifertii strain AS49 plasmid pAS49-4, complete sequence |
| 892 | NZ_CP061625 | Acinetobacter seifertii strain AS49 plasmid pAS49-5, complete sequence |
| 893 | NZ_CP061627 | Acinetobacter seifertii strain AS48 plasmid pAS48-1, complete sequence |
| 894 | NZ_CP061628 | Acinetobacter seifertii strain AS48 plasmid pAS48-2, complete sequence |
| 895 | NZ_CP061630 | Acinetobacter seifertii strain AS47 plasmid pAS47-1, complete sequence |
| 896 | NZ_CP061631 | Acinetobacter seifertii strain AS47 plasmid pAS47-2, complete sequence |
| 897 | NZ_CP061632 | Acinetobacter seifertii strain AS47 plasmid pAS47-3, complete sequence |
| 898 | NZ_CP061633 | Acinetobacter seifertii strain AS47 plasmid pAS47-4, complete sequence |
| 899 | NZ_CP061635 | Acinetobacter seifertii strain AS41 plasmid pAS41-1, complete sequence |
| 900 | NZ_CP061636 | Acinetobacter seifertii strain AS41 plasmid pAS41-2, complete sequence |
| 901 | NZ_CP061637 | Acinetobacter seifertii strain AS41 plasmid pAS41-3, complete sequence |
| 902 | NZ_CP061638 | Acinetobacter seifertii strain AS41 plasmid pAS41-4, complete sequence |

|     |             |                                                                                                   |
|-----|-------------|---------------------------------------------------------------------------------------------------|
| 903 | NZ_CP061639 | Acinetobacter seifertii strain AS41 plasmid pAS41-5, complete sequence                            |
| 904 | NZ_CP061641 | Acinetobacter seifertii strain AS40 plasmid pAS40-1, complete sequence                            |
| 905 | NZ_CP061642 | Acinetobacter seifertii strain AS40 plasmid pAS40-2, complete sequence                            |
| 906 | NZ_CP061643 | Acinetobacter seifertii strain AS40 plasmid pAS40-3, complete sequence                            |
| 907 | NZ_CP061644 | Acinetobacter seifertii strain AS40 plasmid pAS40-4, complete sequence                            |
| 908 | NZ_CP061645 | Acinetobacter seifertii strain AS40 plasmid pAS40-5, complete sequence                            |
| 909 | NZ_CP061647 | Acinetobacter seifertii strain AS39 plasmid pAS39-1, complete sequence                            |
| 910 | NZ_CP061648 | Acinetobacter seifertii strain AS39 plasmid pAS39-2, complete sequence                            |
| 911 | NZ_CP061649 | Acinetobacter seifertii strain AS39 plasmid pAS39-3, complete sequence                            |
| 912 | NZ_CP061661 | Acinetobacter seifertii strain AS31 plasmid pAS31-1, complete sequence                            |
| 913 | NZ_CP061662 | Acinetobacter seifertii strain AS31 plasmid pAS31-2, complete sequence                            |
| 914 | NZ_CP061663 | Acinetobacter seifertii strain AS31 plasmid pAS31-3, complete sequence                            |
| 915 | NZ_CP061665 | Acinetobacter seifertii strain AS28 plasmid pAS28-1, complete sequence                            |
| 916 | NZ_CP061667 | Acinetobacter seifertii strain AS25 plasmid pAS25-1, complete sequence                            |
| 917 | NZ_CP061668 | Acinetobacter seifertii strain AS25 plasmid pAS25-2, complete sequence                            |
| 918 | NZ_CP061676 | Acinetobacter seifertii strain AS17 plasmid pAS17-1, complete sequence                            |
| 919 | NZ_CP061677 | Acinetobacter seifertii strain AS17 plasmid pAS17-2, complete sequence                            |
| 920 | NZ_CP061679 | Acinetobacter seifertii strain AS11 plasmid pAS11-1, complete sequence                            |
| 921 | NZ_CP061680 | Acinetobacter seifertii strain AS11 plasmid pAS11-2, complete sequence                            |
| 922 | NZ_CP061682 | Acinetobacter seifertii strain AS9 plasmid pAS9-1, complete sequence                              |
| 923 | NZ_CP061684 | Acinetobacter seifertii strain AS5 plasmid pAS5-1, complete sequence                              |
| 924 | NZ_CP061685 | Acinetobacter seifertii strain AS5 plasmid pAS5-2, complete sequence                              |
| 925 | NZ_CP061686 | Acinetobacter seifertii strain AS5 plasmid pAS5-3, complete sequence                              |
| 926 | NZ_CP061829 | Acinetobacter seifertii strain AS42 plasmid pAS42-1, complete sequence                            |
| 927 | NZ_CP061830 | Acinetobacter seifertii strain AS42 plasmid pAS42-2, complete sequence                            |
| 928 | NZ_CP061831 | Acinetobacter seifertii strain AS42 plasmid pAS42-3, complete sequence                            |
| 929 | NZ_CP062920 | Acinetobacter baumannii strain Res13-Abat-PEA21-P4-01-A plasmid unnamed1774, complete sequence    |
| 930 | NZ_CP062921 | Acinetobacter baumannii strain Res13-Abat-PEA21-P4-01-A plasmid unnamed1836, complete sequence    |
| 931 | NZ_CP062922 | Acinetobacter baumannii strain Res13-Abat-PEA21-P4-01-A plasmid unnamednovel_1, complete sequence |
| 932 | NZ_CP062923 | Acinetobacter baumannii strain Res13-Abat-PEA21-P4-01-A plasmid unnamednovel_2, complete sequence |

|     |             |                                                                                 |
|-----|-------------|---------------------------------------------------------------------------------|
| 933 | NZ_CP063770 | Acinetobacter sp. Ac-14 plasmid unnamed1, complete sequence                     |
| 934 | NZ_CP063771 | Acinetobacter sp. Ac-14 plasmid unnamed2, complete sequence                     |
| 935 | NZ_CP065433 | Acinetobacter baumannii strain ATCC 17961 plasmid pAB17961-1, complete sequence |
| 936 | NZ_CP065434 | Acinetobacter baumannii strain ATCC 17961 plasmid pAB17961-2, complete sequence |
| 937 | NZ_CP065663 | Acinetobacter johnsonii strain FDAARGOS_910 plasmid unnamed1, complete sequence |
| 938 | NZ_CP065664 | Acinetobacter johnsonii strain FDAARGOS_910 plasmid unnamed2                    |
| 939 | NZ_CP065665 | Acinetobacter johnsonii strain FDAARGOS_910 plasmid unnamed3                    |
| 940 | NZ_CP065886 | Acinetobacter baumannii strain FDAARGOS_917 plasmid unnamed1, complete sequence |
| 941 | NZ_CP065888 | Acinetobacter baumannii strain FDAARGOS_917 plasmid unnamed2                    |
| 942 | NZ_CP066017 | Acinetobacter baumannii strain FDAARGOS_1036 plasmid unnamed                    |
| 943 | NZ_CP066120 | Acinetobacter bereziniae strain GD03185 plasmid unnamed map unlocalized         |
| 944 | NZ_CP066122 | Acinetobacter bereziniae strain GD0320 plasmid unnamed map unlocalized          |
| 945 | NZ_CP066230 | Acinetobacter baumannii strain G20AB011 plasmid pG20AB011-1, complete sequence  |
| 946 | NZ_CP066231 | Acinetobacter baumannii strain G20AB011 plasmid pG20AB011-2, complete sequence  |
| 947 | NZ_CP066233 | Acinetobacter baumannii strain G20AB010 plasmid pG20AB010-1, complete sequence  |
| 948 | NZ_CP066234 | Acinetobacter baumannii strain G20AB010 plasmid pG20AB010-2                     |
| 949 | NZ_CP066236 | Acinetobacter baumannii strain G20AB009 plasmid pG20AB009-1, complete sequence  |
| 950 | NZ_CP066238 | Acinetobacter baumannii strain G20AB007 plasmid pG20AB007-1, complete sequence  |
| 951 | NZ_CP066239 | Acinetobacter baumannii strain G20AB007 plasmid pG20AB007-2, complete sequence  |
| 952 | NZ_CP066240 | Acinetobacter baumannii strain G20AB007 plasmid pG20AB007-3, complete sequence  |
| 953 | NZ_CP067020 | Acinetobacter sp. CS-2 plasmid unnamed1, complete sequence                      |
| 954 | NZ_CP067021 | Acinetobacter sp. CS-2 plasmid unnamed2, complete sequence                      |
| 955 | NZ_CP067103 | Acinetobacter baumannii strain ATCC BAA-1790 plasmid pNC2, complete sequence    |
| 956 | NZ_CP068175 | Acinetobacter ursingii strain FDAARGOS_1096 plasmid unnamed1, complete sequence |
| 957 | NZ_CP068177 | Acinetobacter ursingii strain FDAARGOS_1096 plasmid unnamed2, complete sequence |
| 958 | NZ_CP068178 | Acinetobacter ursingii strain FDAARGOS_1096 plasmid unnamed3, complete sequence |
| 959 | NZ_CP068179 | Acinetobacter ursingii strain FDAARGOS_1096 plasmid unnamed4, complete sequence |
| 960 | NZ_CP068181 | Acinetobacter ursingii strain FDAARGOS_1095 plasmid unnamed1, complete sequence |
| 961 | NZ_CP068182 | Acinetobacter ursingii strain FDAARGOS_1095 plasmid unnamed2, complete sequence |
| 962 | NZ_CP068183 | Acinetobacter ursingii strain FDAARGOS_1095 plasmid unnamed3, complete sequence |
| 963 | NZ_CP068184 | Acinetobacter ursingii strain FDAARGOS_1095 plasmid unnamed4                    |

|     |             |                                                                                  |
|-----|-------------|----------------------------------------------------------------------------------|
| 964 | NZ_CP068185 | Acinetobacter johnsonii strain FDAARGOS_1094 plasmid unnamed1, complete sequence |
| 965 | NZ_CP068186 | Acinetobacter johnsonii strain FDAARGOS_1094 plasmid unnamed2, complete sequence |
| 966 | NZ_CP068188 | Acinetobacter johnsonii strain FDAARGOS_1094 plasmid unnamed3, complete sequence |
| 967 | NZ_CP068189 | Acinetobacter johnsonii strain FDAARGOS_1094 plasmid unnamed4, complete sequence |
| 968 | NZ_CP068190 | Acinetobacter johnsonii strain FDAARGOS_1094 plasmid unnamed5                    |
| 969 | NZ_CP068191 | Acinetobacter johnsonii strain FDAARGOS_1094 plasmid unnamed6                    |
| 970 | NZ_CP068192 | Acinetobacter johnsonii strain FDAARGOS_1094 plasmid unnamed7                    |
| 971 | NZ_CP068193 | Acinetobacter johnsonii strain FDAARGOS_1094 plasmid unnamed8, complete sequence |
| 972 | NZ_CP068194 | Acinetobacter johnsonii strain FDAARGOS_1094 plasmid unnamed9                    |
| 973 | NZ_CP068196 | Acinetobacter johnsonii strain FDAARGOS_1093 plasmid unnamed1, complete sequence |
| 974 | NZ_CP068197 | Acinetobacter johnsonii strain FDAARGOS_1093 plasmid unnamed2                    |
| 975 | NZ_CP068198 | Acinetobacter johnsonii strain FDAARGOS_1093 plasmid unnamed3                    |
| 976 | NZ_CP068199 | Acinetobacter johnsonii strain FDAARGOS_1093 plasmid unnamed4                    |
| 977 | NZ_CP068200 | Acinetobacter johnsonii strain FDAARGOS_1093 plasmid unnamed5                    |
| 978 | NZ_CP068201 | Acinetobacter johnsonii strain FDAARGOS_1093 plasmid unnamed6                    |
| 979 | NZ_CP068202 | Acinetobacter johnsonii strain FDAARGOS_1092 plasmid unnamed1, complete sequence |
| 980 | NZ_CP068203 | Acinetobacter johnsonii strain FDAARGOS_1092 plasmid unnamed2                    |
| 981 | NZ_CP068204 | Acinetobacter johnsonii strain FDAARGOS_1092 plasmid unnamed3                    |
| 982 | NZ_CP068205 | Acinetobacter johnsonii strain FDAARGOS_1092 plasmid unnamed4, complete sequence |
| 983 | NZ_CP068207 | Acinetobacter johnsonii strain FDAARGOS_1092 plasmid unnamed5                    |
| 984 | NZ_CP068208 | Acinetobacter johnsonii strain FDAARGOS_1092 plasmid unnamed6                    |
| 985 | NZ_CP068209 | Acinetobacter johnsonii strain FDAARGOS_1092 plasmid unnamed7, complete sequence |
| 986 | NZ_CP068210 | Acinetobacter johnsonii strain FDAARGOS_1092 plasmid unnamed8, complete sequence |
| 987 | NZ_CP069497 | Acinetobacter pittii strain FDAARGOS_1217 plasmid unnamed1, complete sequence    |
| 988 | NZ_CP069498 | Acinetobacter pittii strain FDAARGOS_1217 plasmid unnamed2, complete sequence    |
| 989 | NZ_CP069505 | Acinetobacter pittii strain FDAARGOS_1215 plasmid unnamed1, complete sequence    |
| 990 | NZ_CP069506 | Acinetobacter pittii strain FDAARGOS_1215 plasmid unnamed2, complete sequence    |

|      |             |                                                                                           |
|------|-------------|-------------------------------------------------------------------------------------------|
| 991  | NZ_CP069507 | Acinetobacter pittii strain FDAARGOS_1215 plasmid unnamed3, complete sequence             |
| 992  | NZ_CP069508 | Acinetobacter pittii strain FDAARGOS_1215 plasmid unnamed4, complete sequence             |
| 993  | NZ_CP069538 | Acinetobacter pittii strain FDAARGOS_1214 plasmid unnamed1, complete sequence             |
| 994  | NZ_CP069539 | Acinetobacter pittii strain FDAARGOS_1214 plasmid unnamed2                                |
| 995  | NZ_CP069540 | Acinetobacter pittii strain FDAARGOS_1214 plasmid unnamed3, complete sequence             |
| 996  | NZ_CP069541 | Acinetobacter pittii strain FDAARGOS_1214 plasmid unnamed4                                |
| 997  | NZ_CP069841 | Acinetobacter baumannii strain FDAARGOS_1360 plasmid unnamed1, complete sequence          |
| 998  | NZ_CP069842 | Acinetobacter baumannii strain FDAARGOS_1360 plasmid unnamed2, complete sequence          |
| 999  | NZ_CP069852 | Acinetobacter baumannii strain FDAARGOS_1359 plasmid unnamed, complete sequence           |
| 1000 | NZ_CP070363 | Acinetobacter baumannii strain AB5075-VUB plasmid pAB5075-VUB_1, complete sequence        |
| 1001 | NZ_CP070364 | Acinetobacter baumannii strain AB5075-VUB plasmid pAB5075-VUB_2, complete sequence        |
| 1002 | NZ_CP070365 | Acinetobacter baumannii strain AB5075-VUB plasmid pAB5075-VUB_3, complete sequence        |
| 1003 | NZ_CP070867 | Acinetobacter johnsonii strain XY27 plasmid plas1, complete sequence                      |
| 1004 | NZ_CP070868 | Acinetobacter johnsonii strain XY27 plasmid plas2, complete sequence                      |
| 1005 | NZ_CP070869 | Acinetobacter johnsonii strain XY27 plasmid plas3, complete sequence                      |
| 1006 | NZ_CP071318 | Acinetobacter indicus strain GXNN15X4 plasmid pGXNN15, complete sequence                  |
| 1007 | NZ_CP071767 | Acinetobacter towneri strain GX3 plasmid pGX3-1, complete sequence                        |
| 1008 | NZ_CP071768 | Acinetobacter towneri strain GX3 plasmid pGX3-2, complete sequence                        |
| 1009 | NZ_CP071769 | Acinetobacter towneri strain GX5 plasmid pGX5, complete sequence                          |
| 1010 | NZ_CP071772 | Acinetobacter towneri strain GX7 plasmid pGX7, complete sequence                          |
| 1011 | NZ_CP071920 | Acinetobacter baumannii strain GIMC5510:ABT-897-17 plasmid pABT-897-17, complete sequence |
| 1012 | NZ_CP072123 | Acinetobacter baumannii strain KSK1 plasmid p1KSK1, complete sequence                     |
| 1013 | NZ_CP072124 | Acinetobacter baumannii strain KSK1 plasmid p2KSK1, complete sequence                     |
| 1014 | NZ_CP072125 | Acinetobacter baumannii strain KSK1 plasmid p3KSK1, complete sequence                     |
| 1015 | NZ_CP072126 | Acinetobacter baumannii strain KSK1 plasmid p4KSK1, complete sequence                     |
| 1016 | NZ_CP072271 | Acinetobacter baumannii strain KSK6 plasmid p1KSK6, complete sequence                     |
| 1017 | NZ_CP072272 | Acinetobacter baumannii strain KSK6 plasmid p2KSK6, complete sequence                     |
| 1018 | NZ_CP072273 | Acinetobacter baumannii strain KSK6 plasmid p3KSK6, complete sequence                     |
| 1019 | NZ_CP072274 | Acinetobacter baumannii strain KSK6 plasmid p4KSK6, complete sequence                     |
| 1020 | NZ_CP072276 | Acinetobacter baumannii strain KSK7 plasmid p1KSK7, complete sequence                     |



|      |             |                                                                                        |
|------|-------------|----------------------------------------------------------------------------------------|
| 1021 | NZ_CP072277 | Acinetobacter baumannii strain KSK7 plasmid p2KSK7, complete sequence                  |
| 1022 | NZ_CP072278 | Acinetobacter baumannii strain KSK7 plasmid p3KSK7, complete sequence                  |
| 1023 | NZ_CP072279 | Acinetobacter baumannii strain KSK7 plasmid p4KSK7, complete sequence                  |
| 1024 | NZ_CP072281 | Acinetobacter baumannii strain KSK10 plasmid p1KSK10, complete sequence                |
| 1025 | NZ_CP072282 | Acinetobacter baumannii strain KSK10 plasmid p2KSK10, complete sequence                |
| 1026 | NZ_CP072283 | Acinetobacter baumannii strain KSK10 plasmid p3KSK10, complete sequence                |
| 1027 | NZ_CP072284 | Acinetobacter baumannii strain KSK10 plasmid p4KSK10, complete sequence                |
| 1028 | NZ_CP072286 | Acinetobacter baumannii strain KSK11 plasmid p1KSK11, complete sequence                |
| 1029 | NZ_CP072287 | Acinetobacter baumannii strain KSK11 plasmid p2KSK11, complete sequence                |
| 1030 | NZ_CP072288 | Acinetobacter baumannii strain KSK11 plasmid p3KSK11, complete sequence                |
| 1031 | NZ_CP072289 | Acinetobacter baumannii strain KSK11 plasmid p4KSK11, complete sequence                |
| 1032 | NZ_CP072291 | Acinetobacter baumannii strain KSK18 plasmid p1KSK18, complete sequence                |
| 1033 | NZ_CP072292 | Acinetobacter baumannii strain KSK18 plasmid p2KSK18, complete sequence                |
| 1034 | NZ_CP072293 | Acinetobacter baumannii strain KSK18 plasmid p3KSK18, complete sequence                |
| 1035 | NZ_CP072294 | Acinetobacter baumannii strain KSK18 plasmid p4KSK18, complete sequence                |
| 1036 | NZ_CP072296 | Acinetobacter baumannii strain KSK19 plasmid p1KSK19, complete sequence                |
| 1037 | NZ_CP072297 | Acinetobacter baumannii strain KSK19 plasmid p2KSK19, complete sequence                |
| 1038 | NZ_CP072298 | Acinetobacter baumannii strain KSK19 plasmid p3KSK19, complete sequence                |
| 1039 | NZ_CP072299 | Acinetobacter baumannii strain KSK19 plasmid p4KSK19, complete sequence                |
| 1040 | NZ_CP072301 | Acinetobacter baumannii strain KSK20 plasmid p1KSK20, complete sequence                |
| 1041 | NZ_CP072302 | Acinetobacter baumannii strain KSK20 plasmid p2KSK20, complete sequence                |
| 1042 | NZ_CP072303 | Acinetobacter baumannii strain KSK20 plasmid p3KSK20, complete sequence                |
| 1043 | NZ_CP072304 | Acinetobacter baumannii strain KSK20 plasmid p4KSK20, complete sequence                |
| 1044 | NZ_CP072306 | Acinetobacter baumannii strain KSK Sensitive plasmid p1KSKSensitive, complete sequence |
| 1045 | NZ_CP072307 | Acinetobacter baumannii strain KSK Sensitive plasmid p2KSKSensitive, complete sequence |
| 1046 | NZ_CP072399 | Acinetobacter baumannii strain KSK2 plasmid p1KSK2, complete sequence                  |
| 1047 | NZ_CP072400 | Acinetobacter baumannii strain KSK2 plasmid p2KSK2, complete sequence                  |
| 1048 | NZ_CP072401 | Acinetobacter baumannii strain KSK2 plasmid p3KSK2, complete sequence                  |
| 1049 | NZ_CP072402 | Acinetobacter baumannii strain KSK2 plasmid p4KSK2, complete sequence                  |
| 1050 | NZ_CP072527 | Acinetobacter baumannii strain DETAB-E227 plasmid pDETAB4, complete sequence           |
| 1051 | NZ_CP072528 | Acinetobacter baumannii strain DETAB-E227 plasmid pDETAB5, complete sequence           |
| 1052 | NZ_CP072529 | Acinetobacter baumannii strain DETAB-E227 plasmid pDETAB6, complete sequence           |

|      |             |                                                                                                                         |
|------|-------------|-------------------------------------------------------------------------------------------------------------------------|
| 1053 | NZ_CP073061 | Acinetobacter baumannii strain DETAB-P39 plasmid pDETAB13, complete sequence                                            |
| 1054 | NZ_CP073242 | Acinetobacter soli strain M3-1-68 plasmid pM3-1-68, complete sequence                                                   |
| 1055 | NZ_HG977523 | Acinetobacter baumannii strain CS01 plasmid pCS01A, complete sequence                                                   |
| 1056 | NZ_HG977524 | Acinetobacter baumannii strain CS01 plasmid pCS01B, complete sequence                                                   |
| 1057 | NZ_HG977525 | Acinetobacter baumannii strain CS01 plasmid pCS01C, complete sequence                                                   |
| 1058 | NZ_HG977527 | Acinetobacter baumannii strain CR17 plasmid pCR17A                                                                      |
| 1059 | NZ_HG977528 | Acinetobacter baumannii strain CR17 plasmid pCR17B                                                                      |
| 1060 | NZ_HG977529 | Acinetobacter baumannii strain CR17 plasmid pCR17C                                                                      |
| 1061 | NZ_JQ739157 | Acinetobacter pittii strain ABCA95 plasmid pABCA95, complete sequence                                                   |
| 1062 | NZ_JQ739158 | Acinetobacter lwoffii strain ABZ78 plasmid pABZ78, complete sequence                                                    |
| 1063 | NZ_KF889012 | Acinetobacter baumannii TYTH-1 plasmid pAB_CC, complete sequence                                                        |
| 1064 | NZ_KJ003839 | Acinetobacter pittii strain Acinetobacter pittii plasmid pNDM-AP, complete sequence                                     |
| 1065 | NZ_KJ534568 | Acinetobacter baumannii strain ATCC 223 plasmid AbATCC223, complete sequence                                            |
| 1066 | NZ_KM051986 | Acinetobacter baumannii strain D72 plasmid pD72-1 clone GC2; global clone 2, complete sequence                          |
| 1067 | NZ_KM210086 | Acinetobacter lwoffii strain JN49-1 plasmid pNDM-JN01, complete sequence                                                |
| 1068 | NZ_KM210088 | Acinetobacter sp. JN247 plasmid pNDM-JN02, complete sequence                                                            |
| 1069 | NZ_KM922672 | Acinetobacter baumannii strain A221 plasmid pAZJ221, complete sequence                                                  |
| 1070 | NZ_KM923969 | Acinetobacter lactucae strain JVAP01 plasmid pNDM-JVAP01, complete sequence                                             |
| 1071 | NZ_KM977710 | Acinetobacter baumannii strain D46 plasmid pD46-3, complete sequence                                                    |
| 1072 | NZ_KP890934 | Acinetobacter baumannii strain BM2686 plasmid pIP1858, complete sequence                                                |
| 1073 | NZ_KR535992 | Acinetobacter baumannii strain A105 plasmid pA105-1, complete sequence                                                  |
| 1074 | NZ_KR535993 | Acinetobacter baumannii strain A105 plasmid pA105-2, complete sequence                                                  |
| 1075 | NZ_KT022421 | Acinetobacter baumannii strain ML plasmid pAB-ML, complete sequence                                                     |
| 1076 | NZ_KT346360 | Acinetobacter baumannii strain RCH52 plasmid pRCH52-1, complete sequence                                                |
| 1077 | NZ_KT779035 | Acinetobacter baumannii strain D4 plasmid pD4, complete sequence                                                        |
| 1078 | NZ_KT852971 | Acinetobacter baumannii strain 255_n plasmid p255n_1 clone MLST16 (Pasteur); Clonal Complex 16; CC16, complete sequence |
| 1079 | NZ_KT965092 | Acinetobacter towneri strain G165 plasmid pNDM-GJ01, complete sequence                                                  |
| 1080 | NZ_KT965093 | Acinetobacter towneri strain G295 plasmid pNDM-GJ02, complete sequence                                                  |
| 1081 | NZ_KU500415 | Acinetobacter baumannii strain JV1 plasmid ABA02, complete sequence                                                     |
| 1082 | NZ_KU549175 | Acinetobacter baumannii strain C13 plasmid pC13-2 clone GC2, complete sequence                                          |
| 1083 | NZ_KU744946 | Acinetobacter baumannii strain A297 (RUH875) plasmid pA297-3 clone Global clone 1 (GC1), complete sequence              |

|      |             |                                                                                                           |
|------|-------------|-----------------------------------------------------------------------------------------------------------|
| 1084 | NZ_KU869528 | Acinetobacter baumannii strain A297(RUH875) plasmid pA297-2 clone GC1 (global clone 1), complete sequence |
| 1085 | NZ_KU869529 | Acinetobacter baumannii strain A297(RUH875) plasmid pA297-1 (pRAY*) clone GC1, complete sequence          |
| 1086 | NZ_KX118105 | Acinetobacter baumannii strain IHIT7853 plasmid IHIT7853-OXA-23, complete sequence                        |
| 1087 | NZ_KX230793 | Acinetobacter baumannii strain MAL plasmid pMAL-1, complete sequence                                      |
| 1088 | NZ_KX230794 | Acinetobacter baumannii strain MAL plasmid pMAL-2, complete sequence                                      |
| 1089 | NZ_KX426227 | Acinetobacter lwoffii strain ED23-35 plasmid pALWED1.1, complete sequence                                 |
| 1090 | NZ_KX426228 | Acinetobacter lwoffii strain ED23-35 plasmid pALWED1.3, complete sequence                                 |
| 1091 | NZ_KX426229 | Acinetobacter lwoffii strain ED45-23 plasmid pALWED2.1, complete sequence                                 |
| 1092 | NZ_KX426230 | Acinetobacter lwoffii strain ED9-5a plasmid pALWED3.5, complete sequence                                  |
| 1093 | NZ_KX426231 | Acinetobacter lwoffii strain EK30A plasmid pALWEK1.5, complete sequence                                   |
| 1094 | NZ_KX426232 | Acinetobacter lwoffii strain VS15 plasmid pALWVS1.1, complete sequence                                    |
| 1095 | NZ_KX528687 | Acinetobacter lwoffii strain ED9-5a plasmid pALWED3.1, complete sequence                                  |
| 1096 | NZ_KX528688 | Acinetobacter lwoffii strain EK30A plasmid pALWEK1.1, complete sequence                                   |
| 1097 | NZ_KY022424 | Acinetobacter baumannii strain Ab8098 plasmid pAb8098, complete sequence                                  |
| 1098 | NZ_KY202456 | Acinetobacter baumannii strain AB1433 plasmid pIBAC_oxa58_1433, complete sequence                         |
| 1099 | NZ_KY202457 | Acinetobacter baumannii strain AB2RED09 plasmid pIBAC_oxa58_2RED, complete sequence                       |
| 1100 | NZ_KY202458 | Acinetobacter baumannii strain AB20C15 plasmid pIBAC_oxa58_20C15, complete sequence                       |
| 1101 | NZ_KY216144 | Acinetobacter baumannii strain RCH51 plasmid pRCH51-3, complete sequence                                  |
| 1102 | NZ_KY499579 | Acinetobacter pittii strain CCBH10253 plasmid pAP10253-1, complete sequence                               |
| 1103 | NZ_KY617771 | Acinetobacter baumannii strain SGH0823 plasmid pS30-1, complete sequence                                  |
| 1104 | NZ_KY704308 | Acinetobacter baumannii strain IHIT32296 plasmid pAbIHIT32296, complete sequence                          |
| 1105 | NZ_KY888886 | Acinetobacter pittii strain IHIT24944 plasmid pAP24944-OXA-58, complete sequence                          |
| 1106 | NZ_LC483156 | Acinetobacter pittii strain SU1805 plasmid pSU1805NDM, complete sequence                                  |
| 1107 | NZ_LC537594 | Acinetobacter lwoffii strain SU1904 plasmid pSU1904NDM, complete sequence                                 |
| 1108 | NZ_LC591943 | Acinetobacter variabilis strain RYU24 plasmid pRYU24, complete sequence                                   |
| 1109 | NZ_LN833432 | Acinetobacter baumannii isolate CHI-32 plasmid pNDM-32, complete sequence                                 |
| 1110 | NZ_LN865144 | Acinetobacter baumannii isolate CIP70.10 plasmid II, complete sequence                                    |
| 1111 | NZ_LN873255 | Acinetobacter johnsonii strain LS47-1 plasmid pAJOLS1.1, complete sequence                                |
| 1112 | NZ_LN873256 | Acinetobacter lwoffii strain ED23-35 plasmid pALWED1.8, complete sequence                                 |
| 1113 | NZ_LN997847 | Acinetobacter baumannii isolate R2091 plasmid II, complete sequence                                       |

|      |             |                                                                                                      |
|------|-------------|------------------------------------------------------------------------------------------------------|
| 1114 | NZ_LR026972 | <i>Acinetobacter baumannii</i> strain KCRI-28 isolate RDK36_28 plasmid pKCRI-28-1, complete sequence |
| 1115 | NZ_LR026973 | <i>Acinetobacter baumannii</i> strain KCRI-43 isolate RDK37_43 plasmid pKCRI-43-1, complete sequence |
| 1116 | NZ_LR026974 | <i>Acinetobacter baumannii</i> strain KCRI-49 isolate RDK39_49 plasmid pKCRI-49-1, complete sequence |
| 1117 | NZ_LT594096 | <i>Acinetobacter baumannii</i> strain BAL062 plasmid 2, complete sequence                            |
| 1118 | NZ_LT605060 | <i>Acinetobacter baumannii</i> strain NCTC7364 plasmid 2, complete sequence                          |
| 1119 | NZ_LT984690 | <i>Acinetobacter baumannii</i> isolate K50 plasmid I, complete sequence                              |
| 1120 | NZ_LT984691 | <i>Acinetobacter baumannii</i> isolate K50 plasmid II, complete sequence                             |
| 1121 | NZ_MF078634 | <i>Acinetobacter pittii</i> strain HGSA488 plasmid pLS488, complete sequence                         |
| 1122 | NZ_MF078635 | <i>Acinetobacter pittii</i> strain HGSA535 plasmid pLS535, complete sequence                         |
| 1123 | NZ_MF399199 | <i>Acinetobacter baumannii</i> plasmid pD46-4, complete sequence                                     |
| 1124 | NZ_MG100202 | <i>Acinetobacter baumannii</i> strain Ab825 plasmid pAb825_36, complete sequence                     |
| 1125 | NZ_MG520098 | <i>Acinetobacter baumannii</i> strain Ab244 plasmid pAb244_7, complete sequence                      |
| 1126 | NZ_MG954376 | <i>Acinetobacter baumannii</i> strain SGH9601 plasmid pS21-1, complete sequence                      |
| 1127 | NZ_MG954377 | <i>Acinetobacter baumannii</i> strain SGH9601 plasmid pS21-2, complete sequence                      |
| 1128 | NZ_MG954378 | <i>Acinetobacter baumannii</i> strain SGH0905 plasmid pS32-1, complete sequence                      |
| 1129 | NZ_MG954379 | <i>Acinetobacter baumannii</i> strain SGH0905 plasmid pS32-2, complete sequence                      |
| 1130 | NZ_MH220285 | <i>Acinetobacter ursingii</i> strain RIVM0002 plasmid pRIVM0002_IMP-4_171109_B03, complete sequence  |
| 1131 | NZ_MH220286 | <i>Acinetobacter ursingii</i> strain RIVM0051 plasmid pRIVM0051_IMP-4, complete sequence             |
| 1132 | NZ_MH220287 | <i>Acinetobacter ursingii</i> strain RIVM0061 plasmid pRIVM0061_IMP-4_171109_B01, complete sequence  |
| 1133 | NZ_MH362811 | <i>Acinetobacter baumannii</i> strain 11A1314CRGN088 plasmid pO237-3, complete sequence              |
| 1134 | NZ_MH362812 | <i>Acinetobacter baumannii</i> strain 11A1314CRGN008 plasmid pO237-1, complete sequence              |
| 1135 | NZ_MH362813 | <i>Acinetobacter baumannii</i> strain 11A1213CRGN055 plasmid pO237-2, complete sequence              |
| 1136 | NZ_MH999418 | <i>Acinetobacter</i> sp. SWBY1 plasmid unnamed, complete sequence                                    |
| 1137 | NZ_MK053932 | <i>Acinetobacter baumannii</i> strain IEC383 plasmid pIEC383                                         |
| 1138 | NZ_MK053934 | <i>Acinetobacter nosocomialis</i> strain IEC38057 plasmid pIEC38057, complete sequence               |
| 1139 | NZ_MK134375 | <i>Acinetobacter baumannii</i> strain 34AB plasmid p34AB, complete sequence                          |
| 1140 | NZ_MK243454 | <i>Acinetobacter baumannii</i> strain 09A16CRGN0014 plasmid pCRA914-67, complete sequence            |

1141 NZ\_MK323040 *Acinetobacter seifertii* strain Asp-1069 plasmid pAs1069\_a, complete sequence

1142 NZ\_MK323041 *Acinetobacter seifertii* strain Asp-1069 plasmid pAs1069\_b, complete sequence

1143 NZ\_MK323042 *Acinetobacter baumannii* strain Acb-45063 plasmid pAb45063\_a, complete sequence

1144 NZ\_MK323043 *Acinetobacter baumannii* strain Acb-45063 plasmid pAb45063\_b, complete sequence

1145 NZ\_MK360916 *Acinetobacter baumannii* plasmid pAB18PR065-MCR-4.3, complete sequence

1146 NZ\_MK386680 *Acinetobacter baumannii* strain ABAY04001 plasmid pABAY04001\_1A, complete sequence

1147 NZ\_MK386681 *Acinetobacter baumannii* strain ABAY09008 plasmid pABAY09008\_1B, complete sequence

1148 NZ\_MK386682 *Acinetobacter baumannii* strain ABAY10001 plasmid pABAY10001\_1C, complete sequence

1149 NZ\_MK386683 *Acinetobacter baumannii* strain ABAY14012 plasmid pABAY14012\_4D, complete sequence

1150 NZ\_MK386684 *Acinetobacter baumannii* strain ABAY15001 plasmid pABAY15001\_6E, complete sequence

1151 NZ\_MK431775 *Acinetobacter baumannii* strain 11A14CRGN003 plasmid pO237-4, complete sequence

1152 NZ\_MK531536 *Acinetobacter baumannii* strain MC1 plasmid pMC1.1, complete sequence

1153 NZ\_MK531537 *Acinetobacter baumannii* strain MC1/MC23 plasmid pMC1.2/pMC23.2, complete sequence

1154 NZ\_MK531538 *Acinetobacter baumannii* strain MC23 plasmid pMC23.1, complete sequence

1155 NZ\_MK531539 *Acinetobacter baumannii* strain MC23 plasmid pMC23.3, complete sequence

1156 NZ\_MK531540 *Acinetobacter baumannii* strain MC75 plasmid pMC75.1, complete sequence

1157 NZ\_MK531541 *Acinetobacter baumannii* strain MC75 plasmid pMC75.2, complete sequence

1158 NZ\_MK944317 *Acinetobacter lwoffii* strain M2a plasmid pAVAc144, complete sequence

1159 NZ\_MK944318 *Acinetobacter lwoffii* strain M2a plasmid pAVAc145, complete sequence

1160 NZ\_MK944319 *Acinetobacter lwoffii* strain M2a plasmid pAVAc130, complete sequence

1161 NZ\_MK944320 *Acinetobacter lwoffii* strain M2a plasmid pAVAc84, complete sequence

1162 NZ\_MK944321 *Acinetobacter lwoffii* strain M2a plasmid pAVAc147, complete sequence

1163 NZ\_MK944322 *Acinetobacter lwoffii* strain M2a plasmid pAVAc176, complete sequence

1164 NZ\_MK978159 *Acinetobacter lwoffii* strain M2a plasmid pAVAc117, complete sequence

1165 NZ\_MK978160 *Acinetobacter lwoffii* strain M2a plasmid pAVAc119, complete sequence

1166 NZ\_MK978161 *Acinetobacter lwoffii* strain M2a plasmid pAVAc116, complete sequence

1167 NZ\_MK978162 *Acinetobacter lwoffii* strain M2a plasmid pAVAc14, complete sequence

1168 NZ\_MK978163 *Acinetobacter lwoffii* strain M2a plasmid pAVAc94, complete sequence

1169 NZ\_MN266872 *Acinetobacter baumannii* plasmid pAC1-BRL, complete sequence

1170 NZ\_MN461227 *Acinetobacter pittii* strain A352 plasmid pA352, complete sequence

1171 NZ\_MN461228 *Acinetobacter pittii* strain A2584 plasmid pA2584, complete sequence

1172 NZ\_MN481286 *Acinetobacter baylyi* strain A2702 plasmid pA2702, complete sequence

|      |             |                                                                                   |
|------|-------------|-----------------------------------------------------------------------------------|
| 1173 | NZ_MN481287 | <i>Acinetobacter pittii</i> strain A2949 plasmid pA2949, complete sequence        |
| 1174 | NZ_MN495625 | <i>Acinetobacter baumannii</i> strain A2485 plasmid pA2485, complete sequence     |
| 1175 | NZ_MN495626 | <i>Acinetobacter baumannii</i> strain A2503 plasmid pA2503, complete sequence     |
| 1176 | NZ_MT002974 | <i>Acinetobacter baumannii</i> strain AB17 plasmid pAB17, complete sequence       |
| 1177 | NZ_MT107270 | <i>Acinetobacter</i> sp. strain SH19PTT10 plasmid pYUSHP10-1, complete sequence   |
| 1178 | NZ_MT319099 | <i>Acinetobacter lwoffii</i> strain VS15 plasmid pALWVS1.4, complete sequence     |
| 1179 | NZ_MT675918 | <i>Acinetobacter lwoffii</i> strain ED9-5A plasmid pALWED3.7, complete sequence   |
| 1180 | NZ_MT675919 | <i>Acinetobacter lwoffii</i> strain EK30A plasmid pALWEK1.12, complete sequence   |
| 1181 | NZ_MT675920 | <i>Acinetobacter lwoffii</i> strain EK30A plasmid pALWEK1.13, complete sequence   |
| 1182 | NZ_MT675921 | <i>Acinetobacter lwoffii</i> strain EK30A plasmid pALWEK1.14, complete sequence   |
| 1183 | NZ_MT675922 | <i>Acinetobacter lwoffii</i> strain EK30A plasmid pALWEK1.16, complete sequence   |
| 1184 | NZ_MT675923 | <i>Acinetobacter lwoffii</i> strain VS15 plasmid pALWVS1.2, complete sequence     |
| 1185 | NZ_MT675924 | <i>Acinetobacter lwoffii</i> strain VS15 plasmid pALWVS1.3, complete sequence     |
| 1186 | NZ_MT675925 | <i>Acinetobacter lwoffii</i> strain EK30A plasmid pALWEK1.15, complete sequence   |
| 1187 | NZ_MT675926 | <i>Acinetobacter lwoffii</i> strain VS15 plasmid pALWVS1.5, complete sequence     |
| 1188 | NZ_MT742180 | <i>Acinetobacter lwoffii</i> strain 12CE1 plasmid pR4WN_12CE1, complete sequence  |
| 1189 | NZ_MT742181 | <i>Acinetobacter johnsonii</i> strain E10B plasmid pR4WN_E10B, complete sequence  |
| 1190 | NZ_MT742182 | <i>Acinetobacter</i> sp. TTH0-4 strain 1BD1 plasmid pR4WN_1BD1, complete sequence |
| 1191 | NZ_MT742183 | <i>Acinetobacter nosocomialis</i> strain WM98B plasmid pWM98B, complete sequence  |

| Accession number | AMR gene  | Identity | Alignment Length/Gene Leng | Coverage | Position in reference | Position in contig | Phenotype              | Plasmid                                                                             |
|------------------|-----------|----------|----------------------------|----------|-----------------------|--------------------|------------------------|-------------------------------------------------------------------------------------|
| NC_019268        | blaNDM-1  | 100      | 813/813                    | 100      | 1..813                | 9068..9880         | Beta-lactam resistance | Acinetobacter lwoffii plasmid pNDM-BJ01, complete sequence                          |
| NC_019281        | blaNDM-1  | 100      | 813/813                    | 100      | 1..813                | 9068..9880         | Beta-lactam resistance | Acinetobacter lwoffii plasmid pNDM-BJ02, complete sequence                          |
| NC_019985        | blaNDM-1  | 100      | 813/813                    | 100      | 1..813                | 9068..9880         | Beta-lactam resistance | Acinetobacter baumannii ZW85-1 plasmid pAbNDM-1, complete sequence                  |
| NC_020818        | blaNDM-1  | 100      | 813/813                    | 100      | 1..813                | 9068..9880         | Beta-lactam resistance | Acinetobacter baumannii plasmid pNDM-AB, complete sequence                          |
| NC_023322        | blaNDM-1  | 100      | 813/813                    | 100      | 1..813                | 8810..9622         | Beta-lactam resistance | Acinetobacter bereziniae plasmid pNDM-40-1, complete sequence                       |
| NC_024959        | blaNDM-1  | 100      | 813/813                    | 100      | 1..813                | 8615..9427         | Beta-lactam resistance | Acinetobacter calcoaceticus plasmid pNDM-WS2, complete sequence                     |
| NC_024999        | blaNDM-1  | 100      | 813/813                    | 100      | 1..813                | 8615..9427         | Beta-lactam resistance | Acinetobacter junii plasmid pNDM-WS1, complete sequence                             |
| NC_025000        | blaNDM-1  | 100      | 813/813                    | 100      | 1..813                | 9068..9880         | Beta-lactam resistance | Acinetobacter lwoffii plasmid pNDM-lz4b, complete sequence                          |
| NC_025116        | blaNDM-1  | 100      | 813/813                    | 100      | 1..813                | 17669..18481       | Beta-lactam resistance | Acinetobacter sp. M131 plasmid pM131_NDM1, complete sequence                        |
| NZ_AP023079      | blaNDM-1  | 100      | 813/813                    | 100      | 1..813                | 17685..18497       | Beta-lactam resistance | Acinetobacter baumannii strain OCU_Ac16a plasmid pOCU_Ac16a_2, complete sequence    |
| NZ_CP010370      | blaNDM-1  | 100      | 813/813                    | 100      | 1..813                | 16430..17242       | Beta-lactam resistance | Acinetobacter nosocomialis strain 6411 plasmid p6411-9.012kb, complete sequence     |
| NZ_CP010399      | blaNDM-1  | 100      | 766/813                    | 94.21894 | 1..766                | 46509..47274       | Beta-lactam resistance | Acinetobacter baumannii strain 6200 plasmid p6200-47.274kb, complete sequence       |
| NZ_CP010399      | blaNDM-16 | 100      | 766/813                    | 94.21894 | 1..766                | 46509..47274       | Beta-lactam resistance | Acinetobacter baumannii strain 6200 plasmid p6200-47.274kb, complete sequence       |
| NZ_CP014478      | blaNDM-1  | 100      | 813/813                    | 100      | 1..813                | 69791..70603       | Beta-lactam resistance | Acinetobacter pittii strain AP_882 plasmid pNDM-AP_882, complete sequence           |
| NZ_CP026127      | blaNDM-1  | 100      | 813/813                    | 100      | 1..813                | 12011..12823       | Beta-lactam resistance | Acinetobacter baumannii strain ABNIH28 plasmid pNDM-0285, complete sequence         |
| NZ_CP026425      | blaNDM-1  | 100      | 813/813                    | 100      | 1..813                | 23465..24277       | Beta-lactam resistance | Acinetobacter sp. ACNIH1 plasmid pNDM-9c17, complete sequence                       |
| NZ_CP026617      | blaNDM-1  | 100      | 813/813                    | 100      | 1..813                | 9753..10565        | Beta-lactam resistance | Acinetobacter sp. SWBY1 plasmid pSWBY1, complete sequence                           |
| NZ_CP027532      | blaNDM-1  | 100      | 813/813                    | 100      | 1..813                | 27410..28222       | Beta-lactam resistance | Acinetobacter baumannii strain AR_0088 plasmid unnamed2, complete sequence          |
| NZ_CP028560      | blaNDM-1  | 100      | 813/813                    | 100      | 1..813                | 57370..58182       | Beta-lactam resistance | Acinetobacter sp. WCHA45 plasmid pNDM1_010045, complete sequence                    |
| NZ_CP032132      | blaNDM-1  | 100      | 813/813                    | 100      | 1..813                | 20893..21705       | Beta-lactam resistance | Acinetobacter chinensis strain WCHAc010005 plasmid pNDM1_010005, complete sequence  |
| NZ_CP032142      | blaNDM-1  | 100      | 813/813                    | 100      | 1..813                | 20196..21008       | Beta-lactam resistance | Acinetobacter sp. WCHAc010052 plasmid pNDM1_010052, complete sequence               |
| NZ_CP032278      | blaNDM-1  | 100      | 813/813                    | 100      | 1..813                | 27148..27960       | Beta-lactam resistance | Acinetobacter sp. WCHAc010034 plasmid pNDM1_010034, complete sequence               |
| NZ_CP032284      | blaNDM-1  | 100      | 813/813                    | 100      | 1..813                | 54853..55665       | Beta-lactam resistance | Acinetobacter sp. WCHA55 plasmid pNDM1_010055, complete sequence                    |
| NZ_CP035935      | blaNDM-1  | 100      | 813/813                    | 100      | 1..813                | 33751..34563       | Beta-lactam resistance | Acinetobacter cumulans strain WCHAc060092 plasmid pNDM1_060092, complete sequence   |
| NZ_CP041229      | blaNDM-1  | 100      | 813/813                    | 100      | 1..813                | 43595..44407       | Beta-lactam resistance | Acinetobacter haemolyticus strain AN54 plasmid pAhaeAN54e, complete sequence        |
| NZ_CP043053      | blaNDM-1  | 100      | 813/813                    | 100      | 1..813                | 84638..85450       | Beta-lactam resistance | Acinetobacter pittii strain AP43 plasmid pAP43-OXA58-NDM1, complete sequence        |
| NZ_CP043309      | blaNDM-1  | 100      | 813/813                    | 100      | 1..813                | 250228..251040     | Beta-lactam resistance | Acinetobacter johnsonii strain AcsW19 plasmid pAcsW19-2, complete sequence          |
| NZ_CP044446      | blaNDM-1  | 100      | 813/813                    | 100      | 1..813                | 78851..79663       | Beta-lactam resistance | Acinetobacter indicus strain CMG3-2 plasmid pCMG3-2-1, complete sequence            |
| NZ_CP044451      | blaNDM-1  | 100      | 813/813                    | 100      | 1..813                | 86444..87256       | Beta-lactam resistance | Acinetobacter indicus strain MMS9-2 plasmid pMMS9-2-1, complete sequence            |
| NZ_CP044464      | blaNDM-1  | 100      | 813/813                    | 100      | 1..813                | 98889..99701       | Beta-lactam resistance | Acinetobacter schindleri strain HZE23-1 plasmid pHZE23-1-1, complete sequence       |
| NZ_CP044475      | blaNDM-1  | 100      | 813/813                    | 100      | 1..813                | 13913..14725       | Beta-lactam resistance | Acinetobacter schindleri strain HZE33-1 plasmid pHZE33-1-1, complete sequence       |
| NZ_CP044484      | blaNDM-1  | 100      | 813/813                    | 100      | 1..813                | 23995..24807       | Beta-lactam resistance | Acinetobacter schindleri strain HZE30-1 plasmid pHZE30-1-1, complete sequence       |
| NZ_CP045128      | blaNDM-1  | 100      | 813/813                    | 100      | 1..813                | 22880..23692       | Beta-lactam resistance | Acinetobacter indicus strain XG03 plasmid pXG03-X3, complete sequence               |
| NZ_CP045130      | blaNDM-1  | 100      | 813/813                    | 100      | 1..813                | 32161..32973       | Beta-lactam resistance | Acinetobacter indicus strain TQ04 plasmid p4TQ-NDM, complete sequence               |
| NZ_CP045133      | blaNDM-1  | 100      | 813/813                    | 100      | 1..813                | 7221..8033         | Beta-lactam resistance | Acinetobacter indicus strain TQ18 plasmid p18TQ-NDM, complete sequence              |
| NZ_CP045136      | blaNDM-1  | 100      | 813/813                    | 100      | 1..813                | 22880..23692       | Beta-lactam resistance | Acinetobacter indicus strain XG01 plasmid pXG01-X3, complete sequence               |
| NZ_CP045197      | blaNDM-1  | 100      | 813/813                    | 100      | 1..813                | 39140..39952       | Beta-lactam resistance | Acinetobacter indicus strain TQ23 plasmid p23TQ-NDM, complete sequence              |
| NZ_CP045561      | blaNDM-1  | 100      | 813/813                    | 100      | 1..813                | 70735..71547       | Beta-lactam resistance | Acinetobacter nosocomialis strain AC1530 plasmid pAC1530, complete sequence         |
| NZ_CP046043      | blaNDM-1  | 100      | 813/813                    | 100      | 1..813                | 30617..31429       | Beta-lactam resistance | Acinetobacter towneri strain 19110F47 plasmid p19110F47-1, complete sequence        |
| NZ_CP047975      | blaNDM-1  | 100      | 813/813                    | 100      | 1..813                | 61381..62193       | Beta-lactam resistance | Acinetobacter baumannii strain DETAB-P2 plasmid pDETAB2, complete sequence          |
| NZ_CP048828      | blaNDM-1  | 100      | 813/813                    | 100      | 1..813                | 201603..202415     | Beta-lactam resistance | Acinetobacter baumannii strain ABF9692 plasmid pABF9692, complete sequence          |
| NZ_CP050416      | blaNDM-1  | 100      | 813/813                    | 100      | 1..813                | 57875..58687       | Beta-lactam resistance | Acinetobacter baumannii strain PM193665 plasmid pPM193665_1, complete sequence      |
| NZ_CP050426      | blaNDM-1  | 100      | 813/813                    | 100      | 1..813                | 57875..58687       | Beta-lactam resistance | Acinetobacter baumannii strain PM194188 plasmid pPM194122_1, complete sequence      |
| NZ_CP053220      | blaNDM-1  | 100      | 813/813                    | 100      | 1..813                | 58992..59804       | Beta-lactam resistance | Acinetobacter baumannii strain DT01139C plasmid unnamed2, complete sequence         |
| NZ_CP054138      | blaNDM-1  | 100      | 813/813                    | 100      | 1..813                | 101397..102209     | Beta-lactam resistance | Acinetobacter pittii strain JXA13 plasmid pHNJXA13-1, complete sequence             |
| NZ_CP059301      | blaNDM-1  | 100      | 813/813                    | 100      | 1..813                | 73124..73936       | Beta-lactam resistance | Acinetobacter baumannii strain AC1633 plasmid pAC1633-1, complete sequence          |
| NZ_CP059559      | blaNDM-1  | 99.88    | 813/813                    | 100      | 1..813                | 36031..36843       | Beta-lactam resistance | Acinetobacter junii strain YR7 plasmid pNDM-YR7, complete sequence                  |
| NZ_CP067021      | blaNDM-1  | 100      | 813/813                    | 100      | 1..813                | 17039..17851       | Beta-lactam resistance | Acinetobacter sp. CS-2 plasmid unnamed2, complete sequence                          |
| NZ_CP072528      | blaNDM-1  | 100      | 813/813                    | 100      | 1..813                | 79595..80407       | Beta-lactam resistance | Acinetobacter baumannii strain DETAB-E227 plasmid pDETAB5, complete sequence        |
| NZ_JQ739157      | blaNDM-1  | 100      | 813/813                    | 100      | 1..813                | 2312..3124         | Beta-lactam resistance | Acinetobacter pittii strain ABCA95 plasmid pABCA95, complete sequence               |
| NZ_KJ003839      | blaNDM-1  | 100      | 813/813                    | 100      | 1..813                | 25918..26730       | Beta-lactam resistance | Acinetobacter pittii strain Acinetobacter pittii plasmid pNDM-AP, complete sequence |
| NZ_KM210086      | blaNDM-14 | 100      | 813/813                    | 100      | 1..813                | 9068..9880         | Beta-lactam resistance | Acinetobacter lwoffii strain JN49-1 plasmid pNDM-JN01, complete sequence            |
| NZ_KM210088      | blaNDM-1  | 100      | 813/813                    | 100      | 1..813                | 9068..9880         | Beta-lactam resistance | Acinetobacter sp. JN247 plasmid pNDM-JN02, complete sequence                        |
| NZ_KM923969      | blaNDM-1  | 100      | 813/813                    | 100      | 1..813                | 9068..9880         | Beta-lactam resistance | Acinetobacter lactucae strain JVAP01 plasmid pNDM-JVAP01, complete sequence         |
| NZ_KT965092      | blaNDM-1  | 100      | 813/813                    | 100      | 1..813                | 14253..15065       | Beta-lactam resistance | Acinetobacter towneri strain G165 plasmid pNDM-GJ01, complete sequence              |
| NZ_KT965093      | blaNDM-1  | 100      | 813/813                    | 100      | 1..813                | 5229..6041         | Beta-lactam resistance | Acinetobacter towneri strain G295 plasmid pNDM-GJ02, complete sequence              |
| NZ_LC483156      | blaNDM-1  | 100      | 813/813                    | 100      | 1..813                | 31134..31946       | Beta-lactam resistance | Acinetobacter pittii strain SU1805 plasmid pSU1805NDM, complete sequence            |

|             |          |               |               |              |                        |                                                                                 |
|-------------|----------|---------------|---------------|--------------|------------------------|---------------------------------------------------------------------------------|
| NZ_LC537594 | blaNDM-1 | 100 813/813   | 100 1..813    | 33772..34584 | Beta-lactam resistance | Acinetobacter lwoffii strain SU1904 plasmid pSU1904NDM, complete sequence       |
| NZ_LC591943 | blaNDM-1 | 100 813/813   | 100 1..813    | 64552..65364 | Beta-lactam resistance | Acinetobacter variabilis strain RYU24 plasmid pRYU24, complete sequence         |
| NZ_LN833432 | blaNDM-1 | 100 813/813   | 100 1..813    | 46686..47498 | Beta-lactam resistance | Acinetobacter baumannii isolate CHI-32 plasmid pNDM-32, complete sequence       |
| NZ_MK053932 | blaNDM-1 | 100 813/813   | 100 1..813    | 9068..9880   | Beta-lactam resistance | Acinetobacter baumannii strain IEC383 plasmid pIEC383                           |
| NZ_MK053934 | blaNDM-1 | 99.88 813/813 | 99.877 1..813 | 31208..32019 | Beta-lactam resistance | Acinetobacter nosocomialis strain IEC38057 plasmid pIEC38057, complete sequence |
| NZ_MT002974 | blaNDM-1 | 100 813/813   | 100 1..813    | 31208..32020 | Beta-lactam resistance | Acinetobacter baumannii strain AB17 plasmid pAB17, complete sequence            |



| Accession  | Description                                                                                                                                                                                                                                                  | Max Score | Total Score | Query Cover | E value | Per. ident | Acc. Len |
|------------|--------------------------------------------------------------------------------------------------------------------------------------------------------------------------------------------------------------------------------------------------------------|-----------|-------------|-------------|---------|------------|----------|
| CP059559.1 | Acinetobacter junii strain YR7 plasmid pNDM-YR7, complete sequence                                                                                                                                                                                           | 8268      | 8507        | 100%        | 0       | 100        | 45911    |
| MT002974.1 | Acinetobacter baumannii strain AB17 plasmid pAB17, complete sequence                                                                                                                                                                                         | 8263      | 8501        | 100%        | 0       | 99.98      | 41087    |
| CP044446.1 | Acinetobacter indicus strain CMG3-2 plasmid pCMG3-2-1, complete sequence                                                                                                                                                                                     | 8263      | 12714       | 100%        | 0       | 99.98      | 120957   |
| CP044475.1 | Acinetobacter schindleri strain HZE33-1 plasmid pHZE33-1-1, complete sequence                                                                                                                                                                                | 8263      | 12714       | 100%        | 0       | 99.98      | 132305   |
| LR697132.1 | Klebsiella pneumoniae isolate 836ac8ea-b38d-11e9-8998-68b599768938 genome assembly, plasmid: p14ARS_VSM0843-1                                                                                                                                                | 8263      | 8501        | 100%        | 0       | 99.98      | 95284    |
| LR697099.1 | Klebsiella pneumoniae isolate 8329a5f4-b38d-11e9-8998-68b599768938 genome assembly, plasmid: p13ARS_GMH0099                                                                                                                                                  | 8263      | 8501        | 100%        | 0       | 99.98      | 273158   |
| CP020524.1 | Escherichia coli strain 190 plasmid unnamed1, complete sequence                                                                                                                                                                                              | 8263      | 8501        | 100%        | 0       | 99.98      | 177196   |
| MH445382.1 | Acinetobacter baylyi strain NB01 plasmid pNDM-NB01, partial sequence                                                                                                                                                                                         | 8263      | 8501        | 100%        | 0       | 99.98      | 32131    |
| MG462728.1 | Escherichia coli strain AMA1416 plasmid pAMA1416, complete sequence                                                                                                                                                                                          | 8263      | 8501        | 100%        | 0       | 99.98      | 190059   |
| CP027532.1 | Acinetobacter baumannii strain AR_0088 plasmid unnamed2, complete sequence                                                                                                                                                                                   | 8263      | 8501        | 100%        | 0       | 99.98      | 41087    |
| CP026425.1 | Acinetobacter sp. ACNIH1 plasmid pNDM-9c17, complete sequence                                                                                                                                                                                                | 8263      | 8501        | 100%        | 0       | 99.98      | 39361    |
| CP026127.1 | Acinetobacter baumannii strain ABNIH28 plasmid pNDM-0285, complete sequence                                                                                                                                                                                  | 8263      | 8501        | 100%        | 0       | 99.98      | 39359    |
| KX832928.1 | Providencia rettgeri strain 06-1619 plasmid p06-1619-NDM, complete sequence                                                                                                                                                                                  | 8263      | 8501        | 100%        | 0       | 99.98      | 54712    |
| CP021961.1 | Klebsiella pneumoniae strain AR_0139 plasmid tig00000006, complete sequence                                                                                                                                                                                  | 8263      | 8501        | 100%        | 0       | 99.98      | 97389    |
| AP018143.1 | Escherichia coli plasmid pM214_AC2 DNA, complete genome, isolate: M214                                                                                                                                                                                       | 8263      | 10487       | 100%        | 0       | 99.98      | 176026   |
| CP021210.1 | Escherichia coli strain strain Z247 plasmid p2474-NDM1, complete sequence                                                                                                                                                                                    | 8263      | 8501        | 100%        | 0       | 99.98      | 75553    |
| KP770032.1 | Citrobacter freundii strain Pn5 genomic sequence                                                                                                                                                                                                             | 8263      | 8501        | 100%        | 0       | 99.98      | 12951    |
| KP347609.1 | Acinetobacter soli strain Cu244 blaNDM-1 gene cluster, partial sequence                                                                                                                                                                                      | 8263      | 8501        | 100%        | 0       | 99.98      | 7937     |
| KM210088.1 | Acinetobacter sp. JN247 plasmid pNDM-JN02, complete sequence                                                                                                                                                                                                 | 8263      | 8501        | 100%        | 0       | 99.98      | 41084    |
| CP010370.2 | Acinetobacter nosocomialis strain 6411 plasmid p6411-9.012kb, complete sequence                                                                                                                                                                              | 8263      | 10498       | 100%        | 0       | 99.98      | 47274    |
| KP009590.1 | Acinetobacter baumannii strain GB661 transposases, AphA6 (aphA6), beta-lactamase NDM-1 (blaNDM-1), Ble (ble), phosphoribosylanthranilate isomerase (trpF), and twin-arginine translocation pathway signal sequence domain protein (dsbC) genes, complete cds | 8263      | 8501        | 100%        | 0       | 99.98      | 7622     |
| CP010391.1 | Klebsiella pneumoniae strain 6234 plasmid p6234-178.193kb, complete sequence                                                                                                                                                                                 | 8263      | 10493       | 100%        | 0       | 99.98      | 178193   |
| OK500124.1 | Providencia rettgeri strain PROV275 plasmid pPROV275-2NDM, complete sequence                                                                                                                                                                                 | 8263      | 8501        | 100%        | 0       | 99.98      | 273271   |
| CP098041.1 | Providencia rettgeri strain 18004577 plasmid p18001477_NDM, complete sequence                                                                                                                                                                                | 8263      | 8501        | 100%        | 0       | 99.98      | 273271   |
| CP095676.1 | Providencia stuartii strain dmpro_s193a plasmid p_dmpro_s193a_NDM1, complete sequence                                                                                                                                                                        | 8263      | 8501        | 100%        | 0       | 99.98      | 287607   |
| CP095673.1 | Enterobacter hormaechei strain dmeb_c388 plasmid p_dmeb_c388_NDM1, complete sequence                                                                                                                                                                         | 8263      | 8501        | 100%        | 0       | 99.98      | 158245   |
| CP095599.1 | Klebsiella pneumoniae strain dm186b plasmid p_dm186b_NDM1, complete sequence                                                                                                                                                                                 | 8263      | 10487       | 100%        | 0       | 99.98      | 174692   |
| CP095597.1 | Klebsiella pneumoniae strain dm12b plasmid p_dm12b_NDM1, complete sequence                                                                                                                                                                                   | 8263      | 10482       | 100%        | 0       | 99.98      | 173482   |
| CP095593.1 | Providencia stuartii strain bpro_s46a plasmid p_bpro_s46a_NDM1, complete sequence                                                                                                                                                                            | 8263      | 8501        | 100%        | 0       | 99.98      | 296291   |
| CP095592.1 | Providencia stuartii strain bpro_s12 plasmid p_bpro_s12_NDM1, complete sequence                                                                                                                                                                              | 8263      | 8501        | 100%        | 0       | 99.98      | 296291   |
| CP095591.1 | Providencia stuartii strain bpro_s102a plasmid p_bpro_s102a_NDM1, complete sequence                                                                                                                                                                          | 8263      | 8501        | 100%        | 0       | 99.98      | 296291   |
| CP095677.1 | Providencia stuartii strain p_dmpro_s749a_NDM1                                                                                                                                                                                                               | 8263      | 8501        | 100%        | 0       | 99.98      | 111974   |
| MZ342958.1 | Citrobacter werkmanii strain LYSPS2 plasmid pLYSPS2-3, complete sequence                                                                                                                                                                                     | 8263      | 8501        | 100%        | 0       | 99.98      | 87232    |
| CP091361.1 | Acinetobacter baumannii strain AB177-VUB chromosome, complete genome                                                                                                                                                                                         | 8263      | 32703       | 100%        | 0       | 99.98      | 4014141  |
| CP090384.1 | Acinetobacter towneri strain SCLZS30 plasmid pNDM_SCLZS30, complete sequence                                                                                                                                                                                 | 8263      | 8501        | 100%        | 0       | 99.98      | 47845    |
| CP089137.1 | Escherichia coli strain XD35 plasmid pXD35004, complete sequence                                                                                                                                                                                             | 8263      | 8501        | 100%        | 0       | 99.98      | 85891    |
| JX072963.1 | Acinetobacter sp. M131 plasmid pM131_NDM1, complete sequence                                                                                                                                                                                                 | 8263      | 8501        | 100%        | 0       | 99.98      | 47271    |
| KF295828.1 | Providencia rettgeri strain 09ACRGNY2001 plasmid pPrY2001, complete sequence                                                                                                                                                                                 | 8263      | 8501        | 100%        | 0       | 99.98      | 113295   |
| JN377410.2 | Acinetobacter baumannii ZW85-1 plasmid pAbNDM-1, complete sequence                                                                                                                                                                                           | 8263      | 12461       | 100%        | 0       | 99.98      | 48368    |
| MW073138.1 | Acinetobacter sp. strain FL51 plasmid pNDM-FL51, complete sequence                                                                                                                                                                                           | 8263      | 8501        | 100%        | 0       | 99.98      | 41068    |
| KC503911.1 | Acinetobacter baumannii strain GF216 plasmid pNDM-AB, complete sequence                                                                                                                                                                                      | 8263      | 10414       | 100%        | 0       | 99.98      | 47098    |
| JX441323.1 | Acinetobacter johnsonii plasmid pNDM-XC1, partial sequence                                                                                                                                                                                                   | 8263      | 8501        | 100%        | 0       | 99.98      | 12376    |
| CP060013.1 | Acinetobacter baumannii strain TP3 chromosome, complete genome                                                                                                                                                                                               | 8263      | 19058       | 100%        | 0       | 99.98      | 3871732  |
| CP060011.1 | Acinetobacter baumannii strain TP2 chromosome, complete genome                                                                                                                                                                                               | 8263      | 18999       | 100%        | 0       | 99.98      | 3870560  |
| JN616388.1 | Acinetobacter lwoffii strain SGC-HZ9 plasmid pAL-1, partial sequence                                                                                                                                                                                         | 8263      | 8501        | 100%        | 0       | 99.98      | 6451     |
| JQ060896.1 | Acinetobacter lwoffii strain WJ10659 plasmid pNDM-BJ02, complete sequence                                                                                                                                                                                    | 8263      | 8501        | 100%        | 0       | 99.98      | 46165    |
| JQ001791.1 | Acinetobacter lwoffii strain WJ10621 plasmid pNDM-BJ01, complete sequence                                                                                                                                                                                    | 8263      | 10476       | 100%        | 0       | 99.98      | 47274    |
| MT897966.1 | Citrobacter freundii plasmid pCf638, partial sequence                                                                                                                                                                                                        | 8263      | 8501        | 100%        | 0       | 99.98      | 16444    |
| LR697127.1 | Escherichia coli isolate 83804cd8-b38d-11e9-8998-68b599768938 genome assembly, plasmid: p14ARS_NMC0074-2                                                                                                                                                     | 8257      | 10487       | 100%        | 0       | 99.96      | 146817   |
| CP035935.1 | Acinetobacter cumulans strain WCHAc060092 plasmid pNDM1_060092, complete sequence                                                                                                                                                                            | 8257      | 12688       | 100%        | 0       | 99.96      | 48560    |
| CP032142.1 | Acinetobacter sp. WCHAc010052 plasmid pNDM1_010052, complete sequence                                                                                                                                                                                        | 8257      | 8630        | 100%        | 0       | 99.96      | 39365    |
| KM210086.1 | Acinetobacter lwoffii strain JN49-1 plasmid pNDM-JN01, complete sequence                                                                                                                                                                                     | 8257      | 8496        | 100%        | 0       | 99.96      | 41084    |
| KJ003839.1 | Acinetobacter pittii strain Acinetobacter pittii plasmid pNDM-AP, complete sequence                                                                                                                                                                          | 8257      | 8630        | 100%        | 0       | 99.96      | 39364    |

|            |                                                                                                                                                                                                                                                                                                                                                                                                                                                                                                                                                                                                                                                                                                                                                                                                                                                                                                                                                                                                                                                                                                                                                                   |      |       |      |   |       |         |
|------------|-------------------------------------------------------------------------------------------------------------------------------------------------------------------------------------------------------------------------------------------------------------------------------------------------------------------------------------------------------------------------------------------------------------------------------------------------------------------------------------------------------------------------------------------------------------------------------------------------------------------------------------------------------------------------------------------------------------------------------------------------------------------------------------------------------------------------------------------------------------------------------------------------------------------------------------------------------------------------------------------------------------------------------------------------------------------------------------------------------------------------------------------------------------------|------|-------|------|---|-------|---------|
| KJ547696.1 | Acinetobacter lwoffii strain Iz4b plasmid pNDM-Iz4b, complete sequence                                                                                                                                                                                                                                                                                                                                                                                                                                                                                                                                                                                                                                                                                                                                                                                                                                                                                                                                                                                                                                                                                            | 8257 | 10482 | 100% | 0 | 99.96 | 46570   |
| CP079750.1 | Acinetobacter johnsonii strain MR1 plasmid pMRB, complete sequence                                                                                                                                                                                                                                                                                                                                                                                                                                                                                                                                                                                                                                                                                                                                                                                                                                                                                                                                                                                                                                                                                                | 8257 | 8496  | 100% | 0 | 99.96 | 41087   |
| MK053934.1 | Acinetobacter nosocomialis strain IEC38057 plasmid pIEC38057, complete sequence                                                                                                                                                                                                                                                                                                                                                                                                                                                                                                                                                                                                                                                                                                                                                                                                                                                                                                                                                                                                                                                                                   | 8255 | 8494  | 100% | 0 | 99.96 | 41085   |
| CP021962.1 | Klebsiella pneumoniae strain AR_0139 plasmid tig00000008, complete sequence                                                                                                                                                                                                                                                                                                                                                                                                                                                                                                                                                                                                                                                                                                                                                                                                                                                                                                                                                                                                                                                                                       | 8255 | 8494  | 100% | 0 | 99.96 | 132217  |
| CP044451.1 | Acinetobacter indicus strain MMS9-2 plasmid pMMS9-2-1, complete sequence                                                                                                                                                                                                                                                                                                                                                                                                                                                                                                                                                                                                                                                                                                                                                                                                                                                                                                                                                                                                                                                                                          | 8251 | 12703 | 100% | 0 | 99.93 | 121603  |
| CP045136.1 | Acinetobacter indicus strain XG01 plasmid pXG01-X3, complete sequence                                                                                                                                                                                                                                                                                                                                                                                                                                                                                                                                                                                                                                                                                                                                                                                                                                                                                                                                                                                                                                                                                             | 8251 | 8490  | 100% | 0 | 99.93 | 103629  |
| CP053220.1 | Acinetobacter baumannii strain DT01139C plasmid unnamed2, complete sequence                                                                                                                                                                                                                                                                                                                                                                                                                                                                                                                                                                                                                                                                                                                                                                                                                                                                                                                                                                                                                                                                                       | 8251 | 12885 | 100% | 0 | 99.93 | 63650   |
| AP023079.1 | Acinetobacter baumannii OCU_Ac16a plasmid pOCU_Ac16a_2 DNA, complete sequence                                                                                                                                                                                                                                                                                                                                                                                                                                                                                                                                                                                                                                                                                                                                                                                                                                                                                                                                                                                                                                                                                     | 8251 | 8490  | 100% | 0 | 99.93 | 41087   |
| CP095609.1 | Klebsiella pneumoniae strain dm330 plasmid p_dm330_NDM1, complete sequence                                                                                                                                                                                                                                                                                                                                                                                                                                                                                                                                                                                                                                                                                                                                                                                                                                                                                                                                                                                                                                                                                        | 8250 | 10474 | 100% | 0 | 99.93 | 154399  |
| CP032278.1 | Acinetobacter sp. WCHAc010034 plasmid pNDM1_010034, complete sequence                                                                                                                                                                                                                                                                                                                                                                                                                                                                                                                                                                                                                                                                                                                                                                                                                                                                                                                                                                                                                                                                                             | 8246 | 14635 | 100% | 0 | 99.91 | 49649   |
| KM923969.1 | Acinetobacter dijkshoorniae strain JVAP01 plasmid pNDM-JVAP01, complete sequence                                                                                                                                                                                                                                                                                                                                                                                                                                                                                                                                                                                                                                                                                                                                                                                                                                                                                                                                                                                                                                                                                  | 8246 | 10471 | 100% | 0 | 99.91 | 47268   |
| CP078046.1 | Acinetobacter lwoffii strain AL_065 plasmid pAL_065-2, complete sequence                                                                                                                                                                                                                                                                                                                                                                                                                                                                                                                                                                                                                                                                                                                                                                                                                                                                                                                                                                                                                                                                                          | 8246 | 16101 | 100% | 0 | 99.91 | 284005  |
| CP095567.1 | Klebsiella pneumoniae strain b193b plasmid p_b193b_NDM1, complete sequence                                                                                                                                                                                                                                                                                                                                                                                                                                                                                                                                                                                                                                                                                                                                                                                                                                                                                                                                                                                                                                                                                        | 8242 | 10458 | 100% | 0 | 99.91 | 173564  |
| CP032132.1 | Acinetobacter chinensis strain WCHAc010005 plasmid pNDM1_010005, complete sequence                                                                                                                                                                                                                                                                                                                                                                                                                                                                                                                                                                                                                                                                                                                                                                                                                                                                                                                                                                                                                                                                                | 8240 | 10449 | 100% | 0 | 99.89 | 39357   |
| MK053932.1 | Acinetobacter baumannii strain IEC383 plasmid pIEC383                                                                                                                                                                                                                                                                                                                                                                                                                                                                                                                                                                                                                                                                                                                                                                                                                                                                                                                                                                                                                                                                                                             | 8235 | 10449 | 100% | 0 | 99.87 | 47283   |
| CP078043.1 | Acinetobacter junii strain AJ_068 plasmid pAJ_068-2, complete sequence                                                                                                                                                                                                                                                                                                                                                                                                                                                                                                                                                                                                                                                                                                                                                                                                                                                                                                                                                                                                                                                                                            | 8235 | 22929 | 100% | 0 | 99.87 | 264416  |
| CP038644.1 | Acinetobacter baumannii strain ACN21 chromosome, complete genome                                                                                                                                                                                                                                                                                                                                                                                                                                                                                                                                                                                                                                                                                                                                                                                                                                                                                                                                                                                                                                                                                                  | 8233 | 21576 | 100% | 0 | 99.84 | 3827138 |
| CP095620.1 | Klebsiella pneumoniae strain dm478b plasmid p_dm478b_NDM1, complete sequence                                                                                                                                                                                                                                                                                                                                                                                                                                                                                                                                                                                                                                                                                                                                                                                                                                                                                                                                                                                                                                                                                      | 8233 | 10009 | 100% | 0 | 99.87 | 174558  |
| CP065392.1 | Acinetobacter baumannii strain AbBAS-1 chromosome                                                                                                                                                                                                                                                                                                                                                                                                                                                                                                                                                                                                                                                                                                                                                                                                                                                                                                                                                                                                                                                                                                                 | 8227 | 33804 | 100% | 0 | 99.84 | 4007838 |
| KX503323.1 | Escherichia coli strain HNEC46 plasmid PHNEC46, complete sequence                                                                                                                                                                                                                                                                                                                                                                                                                                                                                                                                                                                                                                                                                                                                                                                                                                                                                                                                                                                                                                                                                                 | 8218 | 8457  | 100% | 0 | 99.82 | 74046   |
| KF856624.1 | Proteus mirabilis strain FEL 1104F (1104F) gene, partial cds; Salmonella genomic island 1, complete sequence, intl1 (intl1), AacA4 (aacA4), AadB (aadB), DhfrA1 (dhfrA1), OrfC (orfC), QacEdelta1 (qacEdelta1), and Sull (sull) genes, complete cds; tetA pseudogene, complete sequence; VEB-6 (blaVEB-6), QacEdelta1 (qacEdelta1), Sull (sull), and ISCR1 (orf513) genes, complete cds; orfX pseudogene, complete sequence; OrfY (orfY) and ISAbA14, TnpA (tnpA) genes, complete cds; tnpB pseudogene, complete sequence; AphA6 (aphA6), transposase (tnpA), NDM-1 (blaNDM-1), bleMBL (bleMBL), TrpF (trpF), DHA-1 (blaDHA-1), AmpR (ampR), QacEdelta1 (qacEdelta1), Sull (sull), ISCR1 TnpA (tnpA), AmpR (ampR), HybF (hybF), QacEdelta1 (qacEdelta1), and Sull (sul1) genes, complete cds; acetyltransferase domain protein pseudogene, complete sequence; and TnpA transposition transposase (tnpA), TnpR (tnpR), MerR (merR), MerF (merF), MerP (merP), MerT (merT), MerA (merA), MerD (merD), MerE (merE), TniR (tnpR), TniQ (tniQ), TniP (tniP), TniA (tniA), hypothetical protein, HinB (hinB), HinA (hinA), and hypothetical protein genes, complete cds | 8218 | 8457  | 100% | 0 | 99.8  | 67496   |
| LC483156.1 | Acinetobacter pittii SU1805 plasmid pSU1805NDM DNA, complete sequence                                                                                                                                                                                                                                                                                                                                                                                                                                                                                                                                                                                                                                                                                                                                                                                                                                                                                                                                                                                                                                                                                             | 8202 | 8440  | 100% | 0 | 99.69 | 41022   |
| LN611576.1 | Acinetobacter haemolyticus plasmid pNDM-69122 partial sequence, strain 69122-EW                                                                                                                                                                                                                                                                                                                                                                                                                                                                                                                                                                                                                                                                                                                                                                                                                                                                                                                                                                                                                                                                                   | 8196 | 8435  | 99%  | 0 | 99.95 | 8519    |
| CP045133.1 | Acinetobacter indicus strain TQ18 plasmid p18TQ-NDM, complete sequence                                                                                                                                                                                                                                                                                                                                                                                                                                                                                                                                                                                                                                                                                                                                                                                                                                                                                                                                                                                                                                                                                            | 8183 | 8401  | 100% | 0 | 99.66 | 40439   |
| CP045130.1 | Acinetobacter indicus strain TQ04 plasmid p4TQ-NDM, complete sequence                                                                                                                                                                                                                                                                                                                                                                                                                                                                                                                                                                                                                                                                                                                                                                                                                                                                                                                                                                                                                                                                                             | 8183 | 8414  | 100% | 0 | 99.66 | 41086   |
| CP067021.1 | Acinetobacter sp. CS-2 plasmid unnamed2, complete sequence                                                                                                                                                                                                                                                                                                                                                                                                                                                                                                                                                                                                                                                                                                                                                                                                                                                                                                                                                                                                                                                                                                        | 8165 | 21074 | 100% | 0 | 99.98 | 283930  |
| CP078027.1 | Acinetobacter variabilis strain AV_175 chromosome, complete genome                                                                                                                                                                                                                                                                                                                                                                                                                                                                                                                                                                                                                                                                                                                                                                                                                                                                                                                                                                                                                                                                                                | 8080 | 34022 | 100% | 0 | 99.24 | 3252197 |
| KJ018153.1 | Acinetobacter calcoaceticus strain NDM-WS2 plasmid pNDM-WS2 sequence                                                                                                                                                                                                                                                                                                                                                                                                                                                                                                                                                                                                                                                                                                                                                                                                                                                                                                                                                                                                                                                                                              | 8072 | 8311  | 97%  | 0 | 99.93 | 13940   |
| KF702385.1 | Acinetobacter bereziniae strain CHI-40-1 plasmid pNDM-40-1, complete sequence                                                                                                                                                                                                                                                                                                                                                                                                                                                                                                                                                                                                                                                                                                                                                                                                                                                                                                                                                                                                                                                                                     | 8037 | 10262 | 97%  | 0 | 99.98 | 45826   |
| LC537594.1 | Acinetobacter lwoffii SU1904 plasmid pSU1904NDM DNA, complete sequence                                                                                                                                                                                                                                                                                                                                                                                                                                                                                                                                                                                                                                                                                                                                                                                                                                                                                                                                                                                                                                                                                            | 7952 | 8191  | 100% | 0 | 98.62 | 43651   |
| CP045540.1 | Proteus mirabilis strain CRE14IB plasmid pIB_NDM_1, complete sequence                                                                                                                                                                                                                                                                                                                                                                                                                                                                                                                                                                                                                                                                                                                                                                                                                                                                                                                                                                                                                                                                                             | 7749 | 7988  | 93%  | 0 | 99.98 | 99278   |
| JN687470.1 | Providencia stuartii plasmid pMR0211, complete sequence                                                                                                                                                                                                                                                                                                                                                                                                                                                                                                                                                                                                                                                                                                                                                                                                                                                                                                                                                                                                                                                                                                           | 7749 | 7988  | 93%  | 0 | 99.98 | 178277  |
| CP010399.1 | Acinetobacter baumannii strain 6200 plasmid p6200-47.274kb, complete sequence                                                                                                                                                                                                                                                                                                                                                                                                                                                                                                                                                                                                                                                                                                                                                                                                                                                                                                                                                                                                                                                                                     | 7494 | 10494 | 100% | 0 | 99.98 | 47274   |
| JF714412.2 | Escherichia coli strain N10-2337 plasmid pNDM102337, complete sequence                                                                                                                                                                                                                                                                                                                                                                                                                                                                                                                                                                                                                                                                                                                                                                                                                                                                                                                                                                                                                                                                                            | 7280 | 7885  | 88%  | 0 | 99.97 | 165974  |
| LR822055.1 | Citrobacter werkmanii isolate BB1472 genome assembly, plasmid: pCW-NDM-1_                                                                                                                                                                                                                                                                                                                                                                                                                                                                                                                                                                                                                                                                                                                                                                                                                                                                                                                                                                                                                                                                                         | 7107 | 7345  | 86%  | 0 | 99.97 | 161908  |
| LR822058.1 | Escherichia coli isolate BB1471 genome assembly, plasmid: plasmoidNDM-1_                                                                                                                                                                                                                                                                                                                                                                                                                                                                                                                                                                                                                                                                                                                                                                                                                                                                                                                                                                                                                                                                                          | 7105 | 7343  | 85%  | 0 | 99.97 | 9301    |
| CP077964.1 | Proteus mirabilis strain 6Pmi283 plasmid p6Pmi283-NDM, complete sequence                                                                                                                                                                                                                                                                                                                                                                                                                                                                                                                                                                                                                                                                                                                                                                                                                                                                                                                                                                                                                                                                                          | 7020 | 7258  | 85%  | 0 | 99.95 | 211006  |
| CP030876.1 | Klebsiella pneumoniae strain JNM10C3 plasmid pKJNM10C3.1                                                                                                                                                                                                                                                                                                                                                                                                                                                                                                                                                                                                                                                                                                                                                                                                                                                                                                                                                                                                                                                                                                          | 6841 | 7079  | 83%  | 0 | 99.81 | 190163  |
| MZ836799.1 | Escherichia coli strain EC-13-49 plasmid pEC-13-49-NDM-1, complete sequence                                                                                                                                                                                                                                                                                                                                                                                                                                                                                                                                                                                                                                                                                                                                                                                                                                                                                                                                                                                                                                                                                       | 6820 | 7059  | 82%  | 0 | 99.97 | 214323  |
| MZ836796.1 | Escherichia coli strain EC-13-22 plasmid pEC-13-22-NDM-1, complete sequence                                                                                                                                                                                                                                                                                                                                                                                                                                                                                                                                                                                                                                                                                                                                                                                                                                                                                                                                                                                                                                                                                       | 6820 | 7059  | 82%  | 0 | 99.97 | 212551  |
| KU764665.1 | Enterobacter aerogenes strain HN0711 plasmid pHN-NDM0711, partial sequence                                                                                                                                                                                                                                                                                                                                                                                                                                                                                                                                                                                                                                                                                                                                                                                                                                                                                                                                                                                                                                                                                        | 6815 | 7053  | 82%  | 0 | 99.95 | 18622   |
| KP282691.1 | Acinetobacter bereziniae strain ABCA242 plasmid pABCA242 aphA6 (aphA6), transposase (ABCA242_0002), NDM-1 (blaNDM-1), bleomycin resistance protein (ABCA242_0004), TrpF (trpF), DsbC (dsbC), CutA1 (cuA1), GroES (groES), and GroEL (groEL) genes, complete cds; ABAC242_0011 gene, complete sequence; and Resolvase (ABCA242_0012) gene, complete cds                                                                                                                                                                                                                                                                                                                                                                                                                                                                                                                                                                                                                                                                                                                                                                                                            | 6445 | 6684  | 78%  | 0 | 99.97 | 12866   |
| JQ739157.2 | Acinetobacter pittii strain ABCA95 plasmid pABCA95, complete sequence                                                                                                                                                                                                                                                                                                                                                                                                                                                                                                                                                                                                                                                                                                                                                                                                                                                                                                                                                                                                                                                                                             | 6445 | 6684  | 78%  | 0 | 99.97 | 6544    |
| KP282692.1 | Acinetobacter baumannii strain ABC3229 plasmid pABC3229 AphA6 (aphA6), hypothetical protein (ABC3229_0002), BlaNDM-1 (blaNDM-1), bleomycin resistance protein (ABC3229_0004), TrpF (trpF), DsbC (dsbC), CutA1 (cutA1), GroES (groES), GroEL (groEL), and resolvase (ABC3229_0010) genes, complete cds                                                                                                                                                                                                                                                                                                                                                                                                                                                                                                                                                                                                                                                                                                                                                                                                                                                             | 6440 | 6678  | 78%  | 0 | 99.94 | 11777   |

|            |                                                                           |      |      |     |   |       |        |
|------------|---------------------------------------------------------------------------|------|------|-----|---|-------|--------|
| LR822056.1 | Providencia rettgeri isolate BB1487 genome assembly, plasmid: pPR-NDM-1B_ | 6423 | 6662 | 77% | 0 | 99.97 | 210081 |
| LR822049.1 | Providencia rettgeri isolate BB1467 genome assembly, plasmid: pPR-NDM-1A_ | 6423 | 6662 | 77% | 0 | 99.97 | 110068 |
| JQ080305.2 | Acinetobacter haemolyticus plasmid pABC7926, partial sequence             | 6423 | 8648 | 78% | 0 | 99.86 | 12863  |
